# Supplementary material for: Transcranial Magnetic Stimulation as a Potential Biomarker in Multiple Sclerosis: A Systematic Review with Recommendations for Future Research
Source: Neural Plast. 2019 Sep 16;2019:6430596. doi: 10.1155/2019/6430596 (PMC6766108; doi:10.1155/2019/6430596)
Supplement: Supplementary Materials — Figure S1: key potential confounding variable findings. In-depth descriptions of the TMS and clinical outcomes employed in reviewed studies can be found in Tables S1 and S2, respectively. See Tables S3 and S4 for results pertaining to article screening and data extraction, respectively. Original review protocol can be found in Supplemental Methods 1-2. [file 6430596.f1.zip › Supplemental Table S3 - Article Screening.xlsx]

## Sheet: FullTextReview
Number	Authors	Title	Abstract	KPW_Include (Y/N/U/R)	KPW_Comments	NJS_Include (Y/N/U/R)	NJS_Comments	Consensus_Include (Y/N)	Consensus_Comments	Journal	Publication Year	Volume	Issue	Start Page	End Page	e-Page	DOI	Column1	Column2
1		Proceedings of the 15th Biennial Clinical Neurophysiology Workshop of the Australian and New Zealand Association of Neurologists	The proceedings contain 18 papers. The topics discussed include: cortical hyperexcitability of the thenar group of intrinsic hand muscles may contribute to the split-hand sign in ALS; insulin pump therapy in type 1 diabetes: potential to be neuroprotective; diagnostic utility of threshold tracking TMS in ALS: comparative study to Awaji criteria; membrane polarization in sensory and motor axons: e…	N		N	Conference	N		Clinical Neurophysiology (2014) 125:4. Date of Publication: April 2014
2		Joint Meeting of the Swiss Society of Clinical Neurophysiology and Swiss Neurological Society 2012	The proceedings contain 29 papers. The topics discussed include: natalizumab de-escalation to interferon beta-1b in multiple sclerosis patients; dissociation of periodic leg movements from arousals in restless legs syndrome; in vivo cortical spreading depression in epilepsy patients is not limited to clinically significant trauma; clinical yield of electric source imaging in epilepsy; displaying …	N		N	Conference	N		Clinical Neurophysiology (2012) 123:10. Date of Publication: October 2012
3		INCAS Neurocognitive Laboratory; Four Years of Intensive Efforts to Build up Experimental Understructures for Human Subjects in Iran		N		N	Conference	N		Basic and Clinical Neuroscience (2010) 1:4 (70-76). Date of Publication: 2010
4	ABBRUZZESE, G; MORENA, M; DALLAGATA, D; ABBRUZZESE, M; FAVALE, E	MOTOR EVOKED-POTENTIALS (MEPS) IN LACUNAR SYNDROMES	Motor evoked potentials (MEPs) evoked in the biceps, thenar and tibialis anterior muscles by electrical stimulation of the scalp and of the spinal regions were recorded in 32 patients with focal deficits due to minor cerebral ischemia of the lacunar type and in a control group. Somatosensory evoked potentials (SEPs) to median nerve stimulation were also recorded. The central motor conduction time…	N		N	Lacunar stroke	N		ELECTROENCEPHALOGRAPHY AND CLINICAL NEUROPHYSIOLOGY			CLARE	CUSTOMER RELATIONS MANAGER, BAY 15, SHANNON INDUSTRIAL ESTATE CO, CLARE, IRELAND	0013-4694	JUN	1991
5	Abdelkader A.A., Samir H., El-Hadidy R., El-Sawy N.	Repetitive transcranial magnetic stimulation effect in multiple sclerosis spasticity (clinical and electrophysiological evaluation): A preliminary Egyptian study	Background: Repetitive transcranial magnetic stimulation (rTMS) is a noninvasive technique that induces cortical excitability changes at the stimulation and distant sites, leading to either facilitation or inhibition depending on the pulse frequency. These effects may outlast the train of stimulus duration, for minutes or even hours. Repetitive TMS may improve spasticity in multiple sclerosis (MS…	N		N	No healthy control group	N		Egyptian Journal of Neurology, Psychiatry and Neurosurgery (2013) 50:2 (157-162). Date of Publication: 2013
6	Abel, TJ; Hebb, AO; Silbergeld, DL	Cortical stimulation mapping in a patient with foreign accent syndrome: Case report	Foreign accent syndrome is a rare language output disorder characterized by changes in various speech features leading to a perceived foreign accent. There are few cases reported in the literature. Due to the rarity of this condition, information regarding the functional neuroanatomy of FAS is lacking. We present the case of a 60-year-old woman with a left anterior parietal lobe breast carcinoma …	N		N	Foreign accent syndrome	N		CLINICAL NEUROLOGY AND NEUROSURGERY	2009	111	1	97	101		10.1016/j.clineuro.2008.07.014
7	Abo-Krysha N., Farouk A.A.	Utility of clinical assessment and electrophysiological study of the respiratory impairment in Egyptian patients with multiple sclerosis	Background: The respiratory motor pathways may be involved because of the multi-focal nature of central nervous system affection in the Multiple sclerosis, leading to respiratory muscle weakness (predominately diaphragm involvement), producing a restrictive ventilatory defect. Materials & methods: Clinical pulmonary dysfunction index. An index comprised of four clinical signs: the patient's repor…	N		N	No upper- or lower-limb EMG	N		Journal of Neurological Sciences (2007) 24:4 (296-306). Date of Publication: 2007
8	ABRAHAM, R; FORTI, A; ADAMS, J	A COMPARISON OF MAGNETIC STIMULATION AND MEDIAN NERVE SOMATOSENSORY EVOKED-POTENTIALS IN PATIENTS WITH DEFINITE MULTIPLE-SCLEROSIS		N	Conference	N	Conference	N	Conference	INTERNATIONAL JOURNAL OF NEUROSCIENCE			READING	C/O STBS LTD PO BOX 90, READING, BERKS, ENGLAND RG1 8JL	0020-7454		1987
9	ACKERMANN, H; SCHOLZ, E; KOEHLER, W; DICHGANS, J	INFLUENCE OF POSTURE AND VOLUNTARY BACKGROUND CONTRACTION UPON COMPOUND MUSCLE ACTION-POTENTIALS FROM ANTERIOR TIBIAL AND SOLEUS MUSCLE FOLLOWING TRANSCRANIAL MAGNETIC STIMULATION	Compound muscle action potentials (CMAPs) were recorded from anterior tibial (TA) and soleus (SOL) muscles following transcranial magnetic stimulation of motor cortex in 10 healthy subjects: (1) while standing upright without support, (2) while sitting, and (3) while lying supine. The results of this study demonstrate a significant influence of posture upon the amplitudes of CMAPs. Postural facil…	N	Conference	N	Healthy controls only	N		ELECTROENCEPHALOGRAPHY AND CLINICAL NEUROPHYSIOLOGY			CLARE	CUSTOMER RELATIONS MANAGER, BAY 15, SHANNON INDUSTRIAL ESTATE CO, CLARE, IRELAND	0013-4694	FEB	1991
10	Agaoglu, J; Kale, N; Onder, G; Emir, C; Tanik, O	The application of transcranial magnetic stimulation in multiple sclerosis, evaluation of the relation of EDSS and motor-evoked potentials		N	Conference	N	Conference	N	Conference	MULTIPLE SCLEROSIS	2006	12		S167	S167
11	Agosta, F; Valsasina, P; Absinta, M; Sala, S; Caputo, D; Filippi, M	Primary Progressive Multiple Sclerosis: Tactile-associated Functional MR Activity in the Cervical Spinal Cord	Purpose: To assess the extent of tactile-associated cervical spinal cord activation in patients with primary progressive (PP) multiple sclerosis (MS) and to investigate the relationship between spinal cord functional activation and the severity of cervical spinal cord and brain structural damage by using magnetic resonance (MR) images. Materials and Methods: The study was conducted with instituti…	Y		N	No TMS	N		RADIOLOGY	2009	253	1	209	215		10.1148/radiol.2532090187
12	Agosta, F; Valsasina, P; Caputo, D; Stroman, PW; Filippi, M	Tactile-associated recruitment of the cervical cord is altered in patients with multiple sclerosis	Functional magnetic resonance imaging (fMRI) studies of the brain have shown that cortical reorganization might contribute to a more favourable clinical outcome of multiple sclerosis (MS). In order to assess whether fMRI changes can also be detected in the spinal cord from patients with MS, and to investigate their nature and extent, twenty-five patients and 12 matched healthy controls were scann…	N	TMS	N	No TMS	N		NEUROIMAGE	2008	39	4	1542	1548		10.1016/j.neuroimage.2007.10.048
13	Agosta, F; Valsasina, P; Rocca, MA; Caputo, D; Sala, S; Judica, E; Stroman, PW; Filippi, M	Evidence for enhanced functional activity of cervical cord in relapsing multiple sclerosis	Functional MRI (fMRI) was used to assess proprioceptive-associated cervical cord activity in 24 relapsing multiple sclerosis (MS) patients and 10 controls. Cord and brain conventional and diffusion tensor (DT) MRI were also acquired. fMRI was performed using a block design during a proprioceptive stimulation consisting of a passive flexion-extension of the right upper limb. Cord lesion number, cr…	U	Can't read	N	No TMS	N		MAGNETIC RESONANCE IN MEDICINE	2008	59	5	1035	1042		10.1002/mrm.21595
14	Albert M.L.	Aphasia therapy works!		N	Clinical data	N	Aphasia	N		Stroke (2003) 34:4 (992-993). Date of Publication: 1 Apr 2003
16	Aldrich T.K., Sinderby C., McKenzie D.K., Estenne M., Gandevia S.C.	Electrophysiologic techniques for the assessment of respiratory muscle function	This Section of the Statement has described available electrophysiologic tests, the functions of which are to assess the integrity ofthe respiratory neuromotor apparatus. These electrophysiologic tests are technically complex and require considerable expertise. There are two main types of test: electromyography (EMG) and stimulation tests. Type 1: EMG. For the respiratory muscles the EMG can be u…	N	Diagnoses - neurologists or criteria	N	No TMS	N		American Journal of Respiratory and Critical Care Medicine (2002) 166:4 (548-558). Date of Publication: 15 Aug 2002
17	Alexeeva, N; Broton, JG; Calancie, B	Latency of changes in spinal motoneuron excitability evoked by transcranial magnetic brain stimulation in spinal cord injured individuals	Objectives: To examine the basis for delay in the excitatory effects of transcranial magnetic stimulation (TMS) of motor cortex on motoneuron pools of muscles left partially-paralyzed by traumatic spinal cord injury (SCI). Methods: The effect of subthreshold transcranial magnetic stimulation (TMS) on just-suprathreshold H-reflex amplitude was examined in subjects (n = 10) with incomplete cervical…	N	Clinical data	N	Spinal cord injury	N		ELECTROMYOGRAPHY AND MOTOR CONTROL-ELECTROENCEPHALOGRAPHY AND CLINICAL NEUROPHYSIOLOGY			CLARE	CUSTOMER RELATIONS MANAGER, BAY 15, SHANNON INDUSTRIAL ESTATE CO, CLARE, IRELAND	0924-980X	AUG	1998
18	Allah Elshehaby F.G., Ebrahim M.H., Mohamed M.A.E., Mohamed W.F., Ahmed A.E.	Brain Excitability Changes in the Relapsing and Remitting Phases of Multiple Sclerosis: A Study with Transcranial Magnetic Stimulation	Multiple sclerosis (MS) is the most common disabling neurological disease in young adults characterized by recurrent relapses and/or progression. Multiple sclerosis was the first neurological disease in which transcranial magnetic stimulation (TMS) was used. Objective: The aim of this study is to assess the relationship between the level of cerebral excitability and clinical phase of MS (the rela…	N	needle electrodes were used.	N	No healthy control group	N		Egyptian Journal of Neurology, Psychiatry and Neurosurgery (2010) 47:4 (535-540). Date of Publication: October 2010
19	Amadio, S; Pluchino, S; Brini, E; Morana, P; Guerriero, R; Boneschi, FM; Comi, G; Zaratin, P; Muzio, V; Del Carro, U	Motor evoked potentials in a mouse model of chronic multiple sclerosis	We tested cortical motor evoked potentials (cMEPs) as a quantitative marker for in vivo monitoring of corticospinal tract damage in a murine multiple sclerosis model (experimental autoimmune encephalomyelitis, EAE). The cMEPs, previously standardized in naive C57BL/6 developing and adult mice, were studied longitudinally in adult EAE mice. Central conduction times (CCTs) increased significantly s…	N	Poster abstract	N	Rodent model	N		MUSCLE & NERVE	2006	33	2	265	273		10.1002/mus.20463
20	Amato M.P., Portaccio E.	Management options in multiple sclerosis-associated fatigue	Introduction: Multiple sclerosis (MS) is a chronic, inflammatory, autoimmune disease of the CNS. Its characteristic early clinical course includes exacerbations and remissions of neurologic disability. Fatigue is one of the most common symptoms of MS and is associated with a reduced quality of life; it is described as the worst symptom of the disease by 50 60% of patients. Yet, due to limitations…	Y		N		N		Expert Opinion on Pharmacotherapy (2012) 13:2 (207-216). Date of Publication: February 2012							10.1517/14656566.2012.647767
22	Amatya B., Khan F., Demetrios L.L.M.M., Wade D.T.	Effectiveness and safety of non-pharmacological interventions for spasticity in multiple sclerosis: A systematic review	Objectives: To investigate the effectiveness and safety of non-pharmacological interventions for the management of spasticity in people with MS in improving patient outcomes. Design: Systematic review. Settings: Inpatient and ambulatory rehabilitation settings. Methods: A comprehensive literature search was performed using the Cochrane MS Group Trials Register which among other sources contains C…	N	Clinical data? Type, duration, Strength?	N		N		PM and R (2014) 6:8 SUPPL. 2 (S107). Date of Publication: August 2014							10.1016/j.pmrj.2014.08.196
23	Amatya, B; Khan, F; La Mantia, L; Demetrios, M; Wade, DT	Non pharmacological interventions for spasticity in multiple sclerosis	Background Spasticity is commonly experienced by people with multiple sclerosis (MS), and it contributes to overall disability in this population. A wide range of non pharmacological interventions are used in isolation or with pharmacological agents to treat spasticity in MS. Evidence for their effectiveness is yet to be determined. Objectives To assess the effectiveness of various non pharmacolo…	U	mean Expanded Disability Status Scale of 3.5 (range between 2 and 6)..no SD?	N		N		COCHRANE DATABASE OF SYSTEMATIC REVIEWS	2013		2			CD009974	10.1002/14651858.CD009974.pub2
24	Aminoff M.J.	Between the covers: This month's main articles		N	Diagnoses - neurologists or criteria	N	Editorial	N		Muscle and Nerve (2004) 29:6 (v-vi). Date of Publication: Jun 2004
25	Aminoff, MJ	Electrophysiological evaluation of root and spinal cord disease	The electrophysiological evaluation of root or spinal cord disease is complementary to neuroimaging studies, providing information about functional rather than anatomical integrity and information that is important for diagnostic and prognostic purposes. The electrophysiological findings help to localize a lesion but are not pathognomonic of specific diseases. The findings may also provide insigh…	N	Needles electrodes?	N	Spinal cord disease	N		SEMINARS IN NEUROLOGY	2002	22	2	197	204		10.1055/s-2002-36543
26	AndreObadia, N; Garassus, P; Mauguiere, F	Motor evoked potentials (MEPs) assessment of central motor conduction in intraspinal tumors: A study of 33 patients.	MEPs to transcutaneous magnetic stimulation have been recorded in 43 patients with un intraspinal tumor documented by MRI. The tumor was extramedullary in 18 patients and intramedullary in 25. MEPs were abnormal in 62.8% of patients. There, were no significant differences in the rare of MEP abnormalities according to the lesion site or the histological findings, except for meningiomas which showe…	N	Abstract?	N	Intraspinal tumor	N		NEUROPHYSIOLOGIE CLINIQUE-CLINICAL NEUROPHYSIOLOGY			PARIS CEDEX 15	141 RUE JAVEL, 75747 PARIS CEDEX 15, FRANCE	0987-7053		1996
27	Anninos P., Adamopoulos A., Kotini A., Tsagas N.	MEG evaluation of pico-Tesla external TMS on multiple sclerosis patients	Magnetoencephalographic (MEG) recordings of 10 multiple sclerosis (MS) patients (2 men, 8 women, mean 41.3±9.5 years, mean disease duration 12.7±7.2 years) were obtained using a whole-head 122 - channel MEG system in a magnetically shielded room of low magnetic noise. Our experimental design was double-blind in order to look for possible effect of external pico - Tesla Transcranial Magnetic Stimu…	N	Abstract?	N	No healthy control group	N		Multiple Sclerosis and Related Disorders (2016) 8 (45-53). Date of Publication: 1 Jul 2016							10.1016/j.msard.2016.04.008
30	Anninos, P; Adamopoulos, A; Kotini, A; Tsagas, N	The SQUID as diagnostic tool to evaluate the effect of transcranial magnetic stimulation in patients with CNS disorders	Magnetoencephalograph (MEG) recordings of patients with CATS disorders were obtained using a whole-head 122-channel magnetometer SQUID and analyzed using Fourier statistical analysis. External transcranial magnetic stimulation in the order of pica Tesla (pTMS) was applied on the above patients with proper characteristics (magnetic field amplitude : 1-7.5pT, frequency :the alpha-rhythm of the pati…	N	Abstract?	N	No healthy control group	N		ADVANCES IN BIOMEDICAL RESEARCH, PROCEEDINGS	2010			99	+
32	Anninos, P; Chatzimichael, A; Adamopoulos, A; Kotini, A; Tsagas, N	A combined study of MEG and pico-Tesla TMS on children with autism disorder	Magnetoencephalographic (MEG) recordings from the brain of 10 children with autism (6 boys and 4 girls, with ages range from 5-12 years, mean +/- SD: 8.3 +/- 2.1) were obtained using a whole-head 122-channel MEG system in a magnetically shielded room of low magnetic noise. A double-blind experimental design was used in order to look for possible effect of external pico-Tesla Transcranial Magnetic…	N	Clinical data? No EDSS	N	Children with ASD	N		JOURNAL OF INTEGRATIVE NEUROSCIENCE	2016	15	4	497	513		10.1142/S0219635216500278
33	Anninos, P; Kotini, A; Tamiolakis, D; Tsagas, N	Transcranial magnetic stimulation - A case report and review of the literature	Objective : Transcranial magnetic stimulation (TMS) is a non-invasive tool for the electrical stimulation of neural tissue. TMS can be applied as single pulses of stimulation, pairs of stimuli separated by variable intervals to the same or different brain areas, or as trains of repetitive stimuli at various frequencies. Case report : A 2-years-old male infant was referred to our department with a…	Y		N	Epstein-Barr virus	N		ACTA NEUROLOGICA BELGICA	2006	106	1	26	30
34	Arjona, A; Fernandez-Romero, E; Espino, R	Paroxystic anarthria in the multiple sclerosis	Introduction. The paroxystic clinical features of multiple sclerosis (MS) include trigeminal neuralgia, itch, transient diplopia, Lhermitte's sign, akinesia, dystonia, Uhthoff's phenomenon and others which are very characteristic, such as paroxystic ataxia and dysarthria. Clinical case. We present the case of a 30 year old man who consulted for multiple episodes lasting only a few seconds, of com…	N	Leg?	N	No TMS	N		REVISTA DE NEUROLOGIA			BARCELONA	C/O CESAR VIGUERA, EDITOR, APDO 94121, 08080 BARCELONA, SPAIN	0210-0010	FEB 1	1999
35	Arsiwalla X.D., Zucca R., Betella A., Martinez E., Dalmazzo D., Omedas P., Deco G., Verschure P.F.M.J.	Network dynamics with BrainX(3): A large-scale simulation of the human brain network with real-time interaction	BrainX(3) is a large-scale simulation of human brain activity with real-time interaction, rendered in 3D in a virtual reality environment, which combines computational power with human intuition for the exploration and analysis of complex dynamical networks. We ground this simulation on structural connectivity obtained from diffusion spectrum imaging data and model it on neuronal population dynam…	Y	Outpatient? Qualify based on that?	N	Simulation	N		Frontiers in Neuroinformatics (2015) 9:FEB Article Number: 2. Date of Publication: 24 Feb 2015							10.3389/fninf.2015.00002
36	Attarian S.	"Everything is hard before it's easy" - Thomas Fuller		Y	T0	N	Commentary	N		Clinical Neurophysiology (2011) 122:1 (7-8). Date of Publication: January 2011							10.1016/j.clinph.2010.06.014
39	Auer C., Siebner H.R., Dressnandt J., Conrad B.	Intrathecal baclofen increases corticospinal output to hand muscles in multiple sclerosis	Continuous intrathecal baclofen infusion (CIBI) is a highly effective treatment for severe spasticity, especially of spinal origin.1-2 The beneficial effect of CIBI on spasticity is related to its gamma-aminobutyric acid (GABA)B-ergic action on spinal interneurons, resulting in a profound depression of disinhibited mono- and polysynaptic spinal reflexes.1-3 Although the effects on spinal reflexes…	U	Mean, SD?; Diagnoses?	N	No clinical measures	N	No clinical measures	Neurology (1999) 52:6 (1298-1299). Date of Publication: 1999
41	Auer, T; Schwarcz, A; Reka, AH; Barsi, P; Janszky, J	Functional magnetic resonance imaging in neurology	The present contribution discusses the clinical use of functional MRI (fMRI) and its role in the most common neurological diseases. FMRI was found a reliable and reproducible examination tool resulting in a wide distribution of fMRI methods in presurgical evaluation of epilepsy in determining the relationship of eloquent areas and the epileptic focus. Preliminary data suggest that fMRI using memo…	Y		N	No TMS	N		IDEGGYOGYASZATI SZEMLE-CLINICAL NEUROSCIENCE	2008	61	1-2	16	23
42	Awad, RA	Neurogenic bowel dysfunction in patients with spinal cord injury, myelomeningocele, multiple sclerosis and Parkinson's disease	Exciting new features have been described concerning neurogenic bowel dysfunction, including interactions between the central nervous system, the enteric nervous system, axonal injury, neuronal loss, neurotransmission of noxious and non-noxious stimuli, and the fields of gastroenterology and neurology. Patients with spinal cord injury, myelomeningocele, multiple sclerosis and Parkinson's disease …	N	Presentation	N	No TMS	N		WORLD JOURNAL OF GASTROENTEROLOGY	2011	17	46	5035	5048		10.3748/wjg.v17.i46.5035
43	AWISZUS, F; FEISTNER, H	ABNORMAL EPSPS EVOKED BY MAGNETIC BRAIN-STIMULATION IN HAND MUSCLE MOTONEURONS OF PATIENTS WITH AMYOTROPHIC-LATERAL-SCLEROSIS	Using cross-correlation between magnetic brain stimulation and discharges of a motoneuron made active by a slight voluntary contraction, an indirect estimate of the EPSP evoked by magnetic brain stimulation in single hand muscle motoneurons was obtained in patients with amyotrophic lateral sclerosis (ALS) and normal controls. In total, 60 motoneurons of 3 normal subjects and 70 motoneurons of 7 p…	N	Not a TMS study (SEP)	N	ALS	N		ELECTROENCEPHALOGRAPHY AND CLINICAL NEUROPHYSIOLOGY			CLARE	CUSTOMER RELATIONS MANAGER, BAY 15, SHANNON INDUSTRIAL ESTATE CO, CLARE, IRELAND	0013-4694	DEC	1993
44	Ayache S., Farhat W., Zouari H., Mylius V., Creange A., Alani T., Lefaucheur J.-P.	Tremor in multiple sclerosis: The intriguing role of the cerebellum	OBJECTIVE: To determine the presence of tremor in MS patients having functional disability in one or both upper limbs and to determine the existence of cerebellar or protuberential dysfunction associated with tremor. BACKGROUND: The pathophysiology of tremor occurring in multiple sclerosis (MS) remains poorly characterized. Lesion of protuberential structures, the cerebellum or its efferent pathw…	Missing		N	No healthy control group	N		Neurology (2013) 80:1 MeetingAbstracts. Date of Publication: 12 Feb 2013
45	Ayache S.S., Chalah M.A.	Cortical excitability changes: A mirror to the natural history of multiple sclerosis?		Missing		N	Editorial	N		Neurophysiologie Clinique (2017) 47:3 (221-223). Date of Publication: 1 Jun 2017							10.1016/j.neucli.2017.02.001
46	Ayache S.S., Chalah M.A.	Fatigue in multiple sclerosis – Insights into evaluation and management	Multiple sclerosis (MS) is a chronic inflammatory and neurodegenerative disease of the central nervous system, characterized by the accumulation of numerous neurological symptoms and signs throughout its course. Fatigue is one of the most distressing complaints that MS patients may experience over their lifetime. In spite of its high prevalence, the pathophysiology of MS fatigue is far from being…	N	Conference	N	No TMS	N		Neurophysiologie Clinique (2017) 47:2 (139-171). Date of Publication: 1 Apr 2017							10.1016/j.neucli.2017.02.004
49	Ayache S.S., Chalah M.A., Créange A., Lefaucheur J.-P.	Cortical excitability parameters in multiple sclerosis: Where do we stand?	Introduction: The transcranial magnetic stimulation (TMS) is a noninvasive technique that continues to attract the attention of scientists and researchers. When applied to the cerebral cortex, TMS can activate the corticospinal pathways and generate motor evoked potentials in the corresponding muscle. Besides the activation of pyramidal tracts, the development of paired-pulse paradigms has opened…	N	No clinical data (EDSS)	N		N		Brain Stimulation (2017) 10:2 (392). Date of Publication: 1 Mar 2017							10.1016/j.brs.2017.01.158
50	Ayache S.S., Créange A., Farhat W.H., Zouari H.G., Lesage C., Palm U., Abdellaoui M., Lefaucheur J.-P.	Cortical excitability changes over time in progressive multiple sclerosis	In 25 patients with progressive forms of multiple sclerosis (MS), motor cortex excitability was longitudinally studied over one year by means of transcranial magnetic stimulation (TMS). The following TMS parameters were considered: resting and active motor thresholds (MTs), input-output curve, short-interval intracortical inhibition (SICI), and intracortical facilitation. Clinical evaluation was …	N	Presentation	N	No healthy control group	N		Functional Neurology (2015) 30:4 (257-263). Date of Publication: 1 Oct 2015
53	Ayache S.S., Créange A., Farhat W.H., Zouari H.G., Mylius V., Ahdab R., Abdellaoui M., Lefaucheur J.-P.	Relapses in multiple sclerosis: Effects of high-dose steroids on cortical excitability	Background and purpose: High-dose steroid administration is the usual treatment of multiple sclerosis (MS) relapse, but it remains to determine whether this treatment may act by changing the excitability of cortical circuitry. Methods: The functional cortical effects of high-dose steroids in 21 MS patients before and after 3 days of intravenous administration of methylprednisolone (1 g/day) for t…	N	Presentation	N	No healthy control group	N		European Journal of Neurology (2014) 21:4 (630-e30). Date of Publication: April 2014							10.1111/ene.12356
56	Ayache S.S., Lefaucheur J.-P., Chalah M.A.	Long term effects of prefrontal tDCS on multiple sclerosis fatigue: A case study		N	Presentation	N	No TMS	N		Brain Stimulation (2017) 10:5 (1001-1002). Date of Publication: 1 Sep 2017							10.1016/j.brs.2017.05.004
57	Ayache, SS; Ahdab, R; Neves, DO; Nguyen, JP; Lefaucheur, JP	Thalamic Stimulation Restores Defective Cerebellocortical Inhibition in Multiple Sclerosis Tremor		N	Leg	N	Letter	N		MOVEMENT DISORDERS	2009	24	3	467	469		10.1002/mds.22416
59	Ayache, SS; Chalah, MA	Fatigue in multiple sclerosis - Insights into evaluation and management	Multiple sclerosis (MS) is a chronic inflammatory and neurodegenerative disease of the central nervous system, characterized by the accumulation of numerous neurological symptoms and signs throughout its course. Fatigue is one of the most distressing complaints that MS patients may experience over their lifetime. In spite of its high prevalence, the pathophysiology of MS fatigue is far from being…	N	Abstract	R		R		NEUROPHYSIOLOGIE CLINIQUE-CLINICAL NEUROPHYSIOLOGY	2017	47	2	139	171		10.1016/j.neucli.2017.02.004
64	Aydin, S; Abuzayed, B; Kiziltan, G; Gunduz, A; Yagci, S; Mengi, M; Kizilkilic, O; Uzan, M; Hanci, M	Unilateral Thalamic Vim and GPi Stimulation for the Treatment of Holmes' Tremor Caused by Midbrain Cavernoma: Case Report and Review of the Literature	A 30-year-old man with brainstem cavernoma experienced hemorrhage and was operated in 2008. Six months after the operation, the patient presented with new complaints of left arm tremor namely Holmes' tremor. Neurological examination also revealed left-sided internuclear ophthalmoplegia, left-sided mild paresis, and increased deep tendon reflexes of the left upper extremity, truncal ataxia, and dy…	N	No clinical data (EDSS)	N	No TMS	N		JOURNAL OF NEUROLOGICAL SURGERY PART A-CENTRAL EUROPEAN NEUROSURGERY	2013	74	4	271	276		10.1055/s-0032-1322549
65	Azin M., Zangiabadi N., Iranmanesh F., Baneshi M.R., Banihashem S.	Effects of intermittent theta burst stimulation on manual dexterity and motor imagery in patients with multiple sclerosis: A quasi-experimental controlled study	Background: Intermittent theta burst stimulation (iTBS) is a repetitive transcranial magnetic stimulation (rTMS) protocol that influences cortical excitability and motor function recovery. Objectives: This study aimed to investigate the effects of iTBS on manual dexterity and hand motor imagery in multiple sclerosis (MS) patients. Methods: Thirty-six MS patients were non-randomly assigned into sh…	N	No MEP data	N	No healthy control group	N		Iranian Red Crescent Medical Journal (2016) 18:10 Article Number: e27056. Date of Publication: 1 Oct 2016							10.5812/ircmj.27056
67	Babovic, R; Milicevic, S; Radovanovic, S; Jancic, J	Testing of urodynamic dysfunctions in patients with multiple sclerosis	Background/Aim. Multiple sclerosis (MS) is a chronic autoimmune inflammatory disorder of the unknown origin leading to multifocal demyelization, axonal damage and the loss of the nervous tissue in various parts of the central nervous system. Most MS patients have decreased functionality of the bladder leading to various dysuria disorders during the course of the illness. However, in 2% of the cas…	Y		N	No TMS	N		VOJNOSANITETSKI PREGLED	2014	71	5	446	450		10.2298/VSP120618049B
68	Bachasson, D; Temesi, J; Bankole, C; Lagrange, E; Boutte, C; Millet, GY; Verges, S; Levy, P; Feasson, L; Wuyam, B	Assessement of quadriceps strength, endurance and fatigue in FSHD and CMT: Benefits and limits of femoral nerve magnetic stimulation	Objectives: To (i) evaluate the feasibility and the reliability of a test assessing quadriceps strength, endurance and fatigue in patients with fascioscapulohumeral dystrophy (FSHD) and Charcot-Marie-Tooth disease (CMT), (ii) compare quadriceps function between patients and healthy controls. Methods: Controls performed the test once and patients twice on two separate visits. It involved progressi…	N	Poster abstract	N	Fascioscapulohumeral dystrophy and Charcot-Marie-Tooth disease	N		CLINICAL NEUROPHYSIOLOGY	2014	125	2	396	405		10.1016/j.clinph.2013.08.001
69	Báez Martín M.M., Cruz Menor M., Cabrera Abreu I., Cabrera Gómez J., Galvizu Sánchez R.	Utility of auditory middle latency response in patients with Multiple Sclerosis relapsing-remitting type	A prospective study was carried out to establish the utility of Auditory Middle Latency Response (AMLR) in the evaluation of patients with relapsing- remitting multiple sclerosis. Twenty subjects were evaluated with the multimodal battery of auditory, visual and somatosensory evoked potentials, AMLR, and motor evoked potential by transcraneal magnetic stimulation. The results showed the following…	U	Frequency of MEP?	N	No healthy control group	N		Revista Ecuatoriana de Neurologia (2007) 16:2 (69-76). Date of Publication: 2007
70	Baez-Martin, MM; Cabrera-Abreu, I	Mid-latency auditory evoked potential	Aims. Given the diversity of criteria regarding the use of the midlatency auditory evoked potential (MLAEP)for diagnostic purposes, we carry out a review of the subject and highlight areas such as the generators of fundamental components, the conditions in which responses are obtained, factors that can modify results and the clinical uses that have been reported. Development. There seems to be a …	Y		N	No TMS	N		REVISTA DE NEUROLOGIA	2003	37	6	579	586
72	Bagnato F., Centonze D., Galgani S., Grasso M.G., Haggiag S., Strano S.	Painful and involuntary multiple sclerosis	Introduction: Pain, dysphagia, respiratory problems, sexual and cardiovascular dysfunctions may occur in patients with MS. Areas covered: In the present review, we attempt to summarize the current knowledge on the impact pain, dysphagia, respiratory problems, sexual and cardiovascular dysfunctions have in patients with MS. Expert opinion: To effectively manage MS, it is essential that these sympt…	R	Review	N	No TMS	N		Expert Opinion on Pharmacotherapy (2011) 12:5 (763-777). Date of Publication: April 2011							10.1517/14656566.2011.540239
74	Banwell B., Giovannoni G., Hawkes C., Lublin F.	Editors' Welcome		N	leg	N	Editorial	N		Multiple Sclerosis and Related Disorders (2015) 4:5 (A1-A2). Date of Publication: 1 Sep 2015							10.1016/j.msard.2015.08.007
76	Barker A.T., Freeston I.L., Jalinous R., Jarratt J.A.	Clinical evaluation of conduction time measurements in central motor pathways using magnetic stimulation of human brain		N	poster session	N	Letter	N		Lancet (1986) 1:8493 (1325-1326). Date of Publication: 1986
77	Barkhof, F; Elton, M; Lindeboom, J; Tas, MW; Schmidt, WF; Hommes, OR; Polman, CH; Kok, A; Valk, J	Functional correlates of callosal atrophy in relapsing-remitting multiple sclerosis patients. A preliminary MRI study	In multiple sclerosis (MS), periventricular lesions produce atrophy of the corpus callosum (CC), as evidenced by magnetic resonance imaging (MRI). We investigated whether CC atrophy in relapsing-remitting MS patients is related to functional deficits. We compared 14 mildly disabled (mean Expanded Disability Status Scale score 2.7) relapsing-omitting MS patients with 14 age- und sex-matched contro…	N	abstract	N	No TMS	N		JOURNAL OF NEUROLOGY		Imhof-Tas, M.W./L-4403-2015	DARMSTADT	PLATZ DER DEUTSCHEN EINHEIT 25, D-64293 DARMSTADT, GERMANY	0340-5354	MAR	1998
78	Barry, RL; Smith, SA; Dula, AN; Gore, JC	Resting state functional connectivity in the human spinal cord	Functional magnetic resonance imaging using blood oxygenation level dependent (BOLD) contrast is well established as one of the most powerful methods for mapping human brain function. Numerous studies have measured how low-frequency BOLD signal fluctuations from the brain are correlated between voxels in a resting state, and have exploited these signals to infer functional connectivity within spe…	U	Not there	N	No TMS	N		ELIFE	2014	3				e02812	10.7554/eLife.02812
79	Bassi, MS; Mori, F; Buttari, F; Marfia, GA; Sancesario, A; Centonze, D; Iezzi, E	Neurophysiology of synaptic functioning in multiple sclerosis	Multiple sclerosis (MS) is an inflammatory immune-mediate disorder of the central nervous system (CNS), primarily affecting the myelin sheath and followed by neurodegeneration. Synaptic alterations are emerging as critical determinants of early neurodegeneration in MS. Inflammation-induced alterations of synaptic transmission and plasticity have been investigated in vitro and also in human MS usi…	U	not there	N		N		CLINICAL NEUROPHYSIOLOGY	2017	128	7	1148	1157		10.1016/j.clinph.2017.04.006
80	Beaulieu, LD; Schneider, C	Repetitive peripheral magnetic stimulation to reduce pain or improve sensorimotor impairments: A literature review on parameters of application and afferents recruitment	Introduction. Repetitive peripheral magnetic stimulation (rPMS over spinal root, nerve or muscle belly) is a promising technology in physiopathology research. As compared to electrical stimulation, rPMS is deemed to activate deep conductive structures and produce strong muscle contractions and massive proprioceptive afferents with minimal cutaneous recruitment. RPMS may thus act differently on ne…	N	not defined group of MS	N	Irrelevant Review	N		NEUROPHYSIOLOGIE CLINIQUE-CLINICAL NEUROPHYSIOLOGY	2015	45	3	223	237		10.1016/j.neucli.2015.08.002
81	Beaulieu, LD; Schneider, C	Effects of repetitive peripheral magnetic stimulation on normal or impaired motor control. A review	Introduction. - Repetitive magnetic stimulation at the periphery (rPMS), i.e. over spinal roots, nerves or muscles, represents a new painless and noninvasive approach that can contribute to motor recovery. This method is based on the assumption that, under rPMS, neural networks involved in motor control would be regulated by the large recruitment of proprioceptive afferents, with little activatio…	N	clinical data? No EDSS	N	Irrelevant Review	N		NEUROPHYSIOLOGIE CLINIQUE-CLINICAL NEUROPHYSIOLOGY	2013	43	4	251	260		10.1016/j.neucli.2013.05.003
84	Bede, P; Bokde, ALW; Byrne, S; Elamin, M; Fagan, AJ; Hardiman, O	Spinal cord markers in ALS: Diagnostic and biomarker considerations	Despite considerable involvement of the spinal cord in amyotrophic lateral sclerosis (ALS), current biomarker research is primarily centred on brain imaging and CSF proteomics. In clinical practice, spinal cord imaging in ALS is performed primarily to rule out alternative conditions in the diagnostic phase of the disease. Quantitative spinal cord imaging has traditionally been regarded as challen…	U	not there	N	ALS	N		AMYOTROPHIC LATERAL SCLEROSIS	2012	13	5	407	415		10.3109/17482968.2011.649760
85	BEER, S; ROSLER, KM; HESS, CW	DIAGNOSTIC-VALUE OF PARACLINICAL TESTS IN MULTIPLE-SCLEROSIS - RELATIVE SENSITIVITIES AND SPECIFICITIES FOR RECLASSIFICATION ACCORDING TO THE POSER COMMITTEE CRITERIA	The yield of paraclinical tests was evaluated in a prospective study of 189 consecutive patients referred for suspected multiple sclerosis (142 patients with multiple sclerosis, 47 non-multiple sclerosis patients on discharge), Patients were first classified according to the Poser criteria by the clinical findings. Subsequently, the results of paraclinical tests (cranial MRI, visually evoked pote…	U	not there	N	No healthy control group	N		JOURNAL OF NEUROLOGY NEUROSURGERY AND PSYCHIATRY			LONDON	BRITISH MED ASSOC HOUSE, TAVISTOCK SQUARE, LONDON, ENGLAND WC1H 9JR	0022-3050	AUG	1995
86	Belopitova L., Bozhinova V., Georgiev I., Todorova R., Petkov D., Gergelcheva V.	Clinics and prognosls in acute disseminated encephalitis and multiple sclerosis in childhood	The investigation covers 59 children (38 girls and 21 boys) with acute demyelinating processes for a period of 20 years at the Paediatric Neurological Clinics. Onset of the disease in 28 children (37.3%) is between 5-10 years of age and only 9 children (from two years and 6 months up to 5 years) represent 15.3%. Prevailing patients with cerebral form (51%), 9 disclose cerebrospinal localization. …	U	not there	N	Pediatric MS	N		Pediatriya (1997) 36:3 (26-29+3). Date of Publication: 1997
87	Belopitova L., Guergueltcheva V., Bojinova V.	Definite and suspected multiple sclerosis in children: Long-term follow-up and magnetic resonance imaging findings	Twenty-five children at the ages of 3 to 18 years with an initial diagnosis of acute disseminated encephalomyelitis were followed in the Clinic of Child Neurology for a period of 2 to 8 years. In 10 children, there were data for clinically definite or laboratory-supported definite multiple sclerosis. The other 15 children in our study were considered as having suspected multiple sclerosis. Brain …	N	lab-supported probable MS, and suspected MS?	N	Pediatric MS	N		Journal of Child Neurology (2001) 16:5 (317-324). Date of Publication: 2001
90	Benbadis, SR; Lancman, ME; Wolgamuth, BR; Cheek, JC	Value of full-field visual evoked potentials for retrochiasmal lesions	Some abnormalities in the P100 on monocular stimulation have been said to indicate retrochiasmal abnormalities, This study was undertaken to evaluate the reliability of visual evoked potentials (VEPs) for this purpose. We retrospectively reviewed VEPs that could be interpreted as indicative of a retrochiasmal lesion, based on an amplitude asymmetry of >50% between the P100 recorded on the left an…	Y		N	No TMS	N		JOURNAL OF CLINICAL NEUROPHYSIOLOGY			PHILADELPHIA	227 EAST WASHINGTON SQ, PHILADELPHIA, PA 19106	0736-0258	NOV	1996
91	Benoliel, T; Raz, N; Ben-Hur, T; Levin, N	Cortical functional modifications following optic neuritis	Background: We have recently suggested that delayed visual evoked potential (VEP) latencies in the fellow eye (FE) of optic neuritis patients reflect a cortical adaptive process, to compensate for the delayed arrival of visual information via the affected eye (AE). Objective: To define the cortical mechanism that underlies this adaptive process. Methods: Cortical activations to moving stimuli and…	N	clinically isolated syndrome	N	No TMS	N		MULTIPLE SCLEROSIS JOURNAL	2017	23	2	220	227		10.1177/1352458516649677
93	Bentes C., De Carvalho M., De Sá J., Sales Luís M.L.	Chronic steadily progressive central and peripheral predominantly motor demyelination, involving the cranial nerves, responsive to immunoglobulins	The association of central and peripheral demyelination was reported previously. Most of the cases refer to central chronic relapsing demyelination with clinical criteria for multiple sclerosis associated with later signs of peripheral nerve involvement: Other authors, described central lesions in patients with chronic inflammatory demyelinating polyneuropathy and in Guillain-Barre syndrome, as a…	N	poster session	N	No TMS	N		Electromyography and Clinical Neurophysiology (1999) 39:1 (33-37). Date of Publication: January/February 1999
94	BERARDELLI, A	ELECTRICAL AND MAGNETIC SPINAL AND CORTICAL STIMULATION IN MAN	With the technique of transcranial and spinal electrical and magnetic stimulation it is possible to study the function of motor pathways in normal subjects. This technique is also a valuable tool in the investigation of motor pathways in patients with motor disturbances.	N	poster session	N	Healthy controls only	N		CURRENT OPINION IN NEUROLOGY AND NEUROSURGERY			LONDON	34-42 CLEVELAND STREET, LONDON, ENGLAND W1P 6LB	0951-7383	OCT	1991
95	Berger B., Rijntjes M., Stehlin L., Stich O.	Corticosteroid-responsive torticollis as a presenting symptom of multiple sclerosis	Multiple sclerosis (MS) is an autoimmune demyelinating disease of the central nervous system that rarely presents with movement disorder symptoms upon primary manifestation. We report the case of a 45-year-old patient with no history of any medical condition who presented to our clinic with left-sided torticollis. Interestingly, MRI scan of the brain revealed multiple periventricular T2 hyperinte…	N	oral presentation	N	No TMS	N		Journal of the Neurological Sciences (2014) 340:1-2 (239-240). Date of Publication: 15 May 2014							10.1016/j.jns.2014.02.021
97	Blanchette, F; Neuhaus, O	Glatiramer acetate - Evidence for a dual mechanism of action	Glatiramer acetate is a disease-modifying drug approved for the treatment of relapsing-remitting multiple sclerosis. Since its discovery almost four decades ago, and in particular since the observation of its beneficial clinical effects in the late 1980s and early 1990s, numerous data have been generated and contribute pieces of a puzzle to help explain the mechanism of action of glatiramer aceta…	Y		N	Irrelevant Review	N		JOURNAL OF NEUROLOGY	2008	255		26	36		10.1007/s00415-008-1005-5
98	Blythe LaGasse A., Knight A.	Rhythm and music in rehabilitation: A critical review of current research	Although music was once thought to be purely creative, recent research has demonstrated that music can have a profound effect on the motor system. Neuroscience studies have begun to demonstrate the distributed nature of music in the brain. The simple act of listening to music has been shown to activate various cortical regions within the cerebrum, subcortex, cerebellum, and spinal areas. Of parti…	N	Proceedings	N	Irrelevant Review	N		Critical Reviews in Physical and Rehabilitation Medicine (2011) 23:1-4 (49-67). Date of Publication: 2011
99	Bocci, T; Caleo, M; Vannini, B; Vergari, M; Cogiamanian, F; Rossi, S; Priori, A; Sartucci, F	An unexpected target of spinal direct current stimulation: Interhemispheric connectivity in humans	Background: Transcutaneous spinal Direct Current Stimulation (tsDCS) is a noninvasive technique based on the application of weak electrical currents over spinal cord. New method: We studied the effects of tsDCS on interhemispheric motor connectivity and visual processing by evaluating changes in ipsilateral Silent Period (iSP), Transcallosal Conduction Time (TCT) and hemifield Visual Evoked Poten…	N	No controls	N	Healthy controls only	N		JOURNAL OF NEUROSCIENCE METHODS	2015	254		18	26		10.1016/j.jneumeth.2015.07.012
100	BODISWOLLNER, I	SENSORY EVOKED-POTENTIALS - PERG, VEP, AND SEP	The review summarizes current developments in pattern electroretinography practice and theory: generator sources and clinical applications. This is particularly relevant to neuronal diseases of the central nervous system (CNS). Visual evoked potentials (VEPs) are discussed in reference to the evolution and follow up of multiple sclerosis (MS) and in conjunction with magnetic resonance imaging (MR…	N	"Established diagnosis"?	N	Irrelevant Review	N		CURRENT OPINION IN NEUROLOGY AND NEUROSURGERY			LONDON	34-42 CLEVELAND STREET, LONDON W1P 6LE, ENGLAND	0951-7383	OCT	1992
101	Boerio, D; Creange, A; Hogrel, JY; Lefaucheur, JP	Alteration of motor nerve recovery cycle in multiple sclerosis	Objective: To study peripheral motor nerve excitability in patients with multiple sclerosis (MS). Methods: Twenty MS patients with normal nerve conduction parameters and no predisposing factors for peripheral neuropathy were included. Compound muscle action potentials were recorded from the abductor digiti nummi muscle to paired-pulse stimulation of the ulnar nerve at the wrist, with various inte…	N	TMS	N	No TMS	N	No TMS	CLINICAL NEUROPHYSIOLOGY	2007	118	8	1753	1758		10.1016/j.clinph.2007.04.025
102	Boerio, D; Lefaucheur, JP; Bassez, G; Hogrel, JY	Central and peripheral components of exercise-related fatigability in myotonic dystrophy type 1	Background - Fatigue frequently occurs in myotonic dystrophy type 1 (DM1), but its pathophysiology remains unclear. This study assessed central and peripheral components of exercise-related fatigability in patients with DM1, compared to controls. Methods - Examinations were performed before and after a contraction of the abductor digiti minimi (ADM) muscle sustained for 45 s at 60% of maximal vol…	Y		N	Myoyonic dystrophy	N		ACTA NEUROLOGICA SCANDINAVICA	2012	125	1	38	46		10.1111/j.1600-0404.2011.01497.x
103	Boerio, D; Lefaucheur, JP; Hogrel, JY; Creange, A	Pathophysiology and treatment of fatigue in multiple sclerosis.	Patients suffering from multiple sclerosis (MS) frequently complain of fatigue (53 to 92 percent depending on studies). Fatigue can be one of the most disabling symptoms of MS and presents as physical or mental fatigue in daily living activities. Besides this permanent feeling of exhaustion, MS patients can suffer from an abnormal tiredness and lack of energy after a given motor or mental task, w…	N	Conference	N		N		REVUE NEUROLOGIQUE	2006	162	3	311	320		10.1016/S0035-3787(06)75017-2
104	Bojakowski J.	The history of motor evoked potentials by using transcranial magnetic stimulation. Pioneers and continuators	The history of development of transcranial magnetic simulation (TMS) as a method to elicit motor evoked potentials (MEP) is described. This history, in a chronological order, was shown by presenting most important persons who participated in discovering the relevant rules of physics, inventors, constructors, and finally physicians who adapted the mentioned method and technical devices for investi…	U	not there	N		N		Family Medicine and Primary Care Review (2015) 17:4 (293-298). Date of Publication: 1 Oct 2015							10.5114/fmpcr/60359
105	Bojinova V., Dimova P., Gergueltcheva V., Petkov R., Belopitova L., Yankov T.	Peculiarities of multiple sclerosis in childhood - Frequency, clinical characteristics, diagnosis, prognosis, treatment	Multiple sclerosis (MS) is a rare disease in childhood. It encompasses childhood form with onset up to 10 years and juvenile form in the puberty. The aim of the study was to analyze the frequency, clinical forms, diagnostics, clinical course, and prognosis in children with MS. Clinical contingent and methods: 44 children 3 to 17 years of age wih MS-definite (n = 26), probable (n = 18) according t…	N	Healthy controls	N	Pediatric MS	N		Pediatriya (2005) 45:4 (21-25+3-4). Date of Publication: 2005
106	Bolbocean O., Bohotin V., Popescu C.D.	Motor pathway abnormality in multiple sclerosis	Background: Multiple Sclerosis (MS) is a chronic autoimmune demyelinating disease of the central nervous system. Motor symptoms represent one of the most frequent and disabling syndrome of MS. Transcranial magnetic stimulation is a technique used for the investigation of the cortico-spinal tract able to measure the modification at any level of motor pathway. The aim of the study was to determine …	U	Can't read	N	No patient demographics	N	No patient demographics	Romanian Journal of Neurology/ Revista Romana de Neurologie (2009) 8:3 (115-118). Date of Publication: 2009
107	Bolbocean O., Bohotin V., Popescu C.D.	Motor evoked potentials modification in different forms and stages of multiple sclerosis	Background: In patients with Multiple Sclerosis (MS), transcranial magnetic stimulation (TMS) has shown significant prolongation of central motor conduction time (CMCT). Abnormal CMCT may reflect sub-clinical involvement of motor pathways and correlate with clinical motor disability.The present study was undertaken to determine the diagnostic yield of TMS in MS, to assess the strength of the corr…	N	Clinical data	N	No clinical measures	N	No clinical measures	Romanian Journal of Neurology/ Revista Romana de Neurologie (2009) 8:3 (119-123). Date of Publication: 2009
108	Bolbocean, O; Ignat, B; Grosu, C; Matei, D; Popescu, D; Popescu, CD	Modifications of Electrophysiological Parameters in Patients with Multiple Sclerosis	Multiple sclerosis (MS) is the most frequent disabling disease of the young adult. Progression of the disease must be documented in order to properly conduct the treatment. Transcranial magnetical stimulation is able to assess the function of the motor system. Corpus callosum lesions are relatively specific and frequent in MS. As transcallosal inhibition (TI) is able to evaluate interhemispheric …	N	Diagnoses - neurologists or criteria	N	Conference	N	Conference	2013 E-HEALTH AND BIOENGINEERING CONFERENCE (EHB)	2013
109	Bonfiglio, L; Rossi, B; Sartucci, F	Prolonged intracortical delay of long-latency reflexes: Electrophysiological evidence for a cortical dysfunction in multiple sclerosis	Convincing evidence suggests that long-latency reflexes (LLRs) are capable of testing the transcortical sensorimotor reflex arch. By subtracting the sum of the latencies of N20 (afferent branch) and transcranially elicited motor evoked potentials (MEP; efferent branch) from the LLR II latency, the cortical relay time (CRT) can also be obtained, which is alleged to represent the time required for …	N	Clinical data	N	No clinical measures	N	No clinical measures	BRAIN RESEARCH BULLETIN	2006	69	6	606	613		10.1016/j.brainresbull.2006.03.003
112	Boniface S.J., Schubert M., Mills K.R.	Suppression and long latency excitation of single spinal motoneurons by transcranial magnetic stimulation in health, multiple sclerosis, and stroke	Whether or not suppression at the level of the spinal motoneuron plays a role in motor deficits such as central paresis is unknown. In this study suppression in the firing of tonically active low threshold single motoneurons following low intensity transcranial magnetic stimulation is described in health and disease. Changes in firing probability in the absence of an early excitatory response wer…	N	No MEP data	N	No TMS	N		Muscle and Nerve (1994) 17:6 (642-646). Date of Publication: 1994							10.1002/mus.880170612
114	BONIFACE, SJ; MILLS, KR	SUPPRESSION OF MOTOR-NEURON FIRING BY TRANSCRANIAL MAGNETIC STIMULATION IN A PATIENT WITH MULTIPLE-SCLEROSIS		N	not there	N	No healthy control group	N		JOURNAL OF NEUROLOGY NEUROSURGERY AND PSYCHIATRY			LONDON	BRITISH MED ASSOC HOUSE, TAVISTOCK SQUARE, LONDON, ENGLAND WC1H 9JR	0022-3050	AUG	1992
115	Boniface, SJ; Mills, KR; Schubert, M	Suppression of single spinal motoneurones by transcranial magnetic stimulation: Studies in healthy subjects, multiple sclerosis and stroke	Transcranial magnetic stimulation produces at least two peaks in firing probability in single human spinal motoneurones (Boniface, Mills & Schubert, 1991, Mills, Boniface & Schubert, 1992). These have latencies varying from 20 – 31 ms and 64 – 100 ms in the first dorsal interosseus muscle and have been termed the primary and secondary peaks, respectively. These events are also detectable in patie…	N	conference	Y		N	SINGLE MOTOR UNIT	ALPHA AND GAMMA MOTOR SYSTEMS			NEW YORK	233 SPRING ST, NEW YORK, NY 10013			1995
116	BONIFACE, SJ; MILLS, KR; SCHUBERT, M	RESPONSES OF SINGLE SPINAL MOTONEURONS TO MAGNETIC BRAIN-STIMULATION IN HEALTHY-SUBJECTS AND PATIENTS WITH MULTIPLE-SCLEROSIS	Magnetic stimuli delivered over the scalp can cause single motor units to discharge in intrisic hand muscles. The discharge characteristics of 26 tonically active, low threshold single motor units in the first dorsal interosseous muscle of 13 healthy subjects and of 21 motor units in 9 patients with multiple sclerosis (MS) were studied. Up to 500 transcranial magnetic stimuli were delivered at th…	N	Not MEP UL	Y		N	SINGLE MOTOR UNIT	BRAIN			OXFORD	WALTON ST JOURNALS DEPT, OXFORD, ENGLAND OX2 6DP	0006-8950	FEB	1991
118	Bonzano L., Avanzino L., Bisio A., Bove M., Gallo F., Laroni A., Mancardi G.L., Mueller M., Pardini M., Pedullà L., Roccatagliata L., Solaro C., Sormani M.P., Uccelli A.	Hand motor performance as a new quantitative clinical endpoint in MS: Longitudinal evaluation in patients with CIS and correlation with accumulation of disability and tissue integrity at MRI	Background: Expanded Disability Status Scale (EDSS) is mainly based on lower limb assessment; this is a limitation in the interpretation of clinical trials in multiple sclerosis (MS). Recently we tested an engineered glove to assess finger motor performance; the motor parameters were reproducible and showed significant differences between healthy controls and people with MS with EDSS=0. This sens…	Y		N	Clincally isolated syndrome	N		Multiple Sclerosis (2016) 22 Supplement 3 (449). Date of Publication: 1 Sep 2016							10.1177/1352458516663086
119	Bonzano, L; Tacchino, A; Roccatagliata, L; Mancardi, GL; Abbruzzese, G; Bove, M	Structural Integrity of Callosal Midbody Influences Intermanual Transfer in a Motor Reaction-Time Task	Training one hand on a motor task results in performance improvements in the other hand, also when stimuli are randomly presented (nonspecific transfer). Corpus callosum (CC) is the main structure involved in interhemispheric information transfer; CC pathology occurs in patients with multiple sclerosis (PwMS) and is related to altered performance of tasks requiring interhemispheric transfer of se…	N	No healthy control group	N	No TMS	N		HUMAN BRAIN MAPPING	2011	32	2	218	228		10.1002/hbm.21011
120	Boroojerdi B., Hungs M., Mull M., Töpper R., Noth J.	Interhemispheric inhibition in patients with multiple sclerosis	Objectives: A single focal magnetic stimulus applied to the motor cortex of normal subjects can suppress ongoing voluntary electromyographic activity in ipsilateral small hand muscles. This inhibition is mediated from one motor cortex to the contralateral side via a transcallosal pathway. Methods: We have investigated transcallosal inhibition in 24 patients with definite multiple sclerosis (MS) a…	N	Needle electrodes were used	N	No surface EMG (Needle electrodes)	N	No surface EMG (needle electrodes)	Electroencephalography and Clinical Neurophysiology - Electromyography and Motor Control (1998) 109:3 (230-237). Date of Publication: June 1998							10.1016/S0924-980X(98)00013-7
123	Borsook D.	Neurological diseases and pain	Chronic pain is a frequent component of many neurological disorders, affecting 20-40 of patients for many primary neurological diseases. These diseases result from a wide range of pathophysiologies including traumatic injury to the central nervous system, neurodegeneration and neuroinflammation, and exploring the aetiology of pain in these disorders is an opportunity to achieve new insight into p…	Y		N	Irrelevant Review	N		Brain (2012) 135:2 (320-344). Date of Publication: February 2012							10.1093/brain/awr271
125	BOTZEL, K; WITT, TN	TRANSCRANIAL CORTICAL STIMULATION IN SYRINGOMYELIA - CORRELATION WITH DISABILITY	Central motor conduction times were studied using transcranial magnetic stimulation in 17 patients with syringomyelia. Central motor conduction time (lower-limb pathway) was prolonged or responses were absent in 44% of stimulations. When results were compared with clinical findings and magnetic resonance tomography, only a weak correlation was found. Transcranial magnetic stimulation is thus of l…	Y		N	Syringomyelia	N		MUSCLE & NERVE			NEW YORK	605 THIRD AVE, NEW YORK, NY 10158-0012	0148-639X	MAY	1993
126	Boulanger, Y; Labelle, M; Khiat, A	Role of phospholipase A(2) on the variations of the choline signal intensity observed by H-1 magnetic resonance spectroscopy in brain diseases	Phospholipase Az catalyzes the hydrolysis of membrane glycerophospholipids leading to the production of metabolites observable by both H-1 and P-31 magnetic resonance spectroscopy. The signal of choline-containing compounds (Cho) observed by H-1 magnetic resonance spectroscopy is constituted of metabolites of phosphatidylcholine, especially phosphocholine (PCho) and glycerophosphocholine (GPCho).…	N	criteria? No official diagnoses	N	No TMS	N		BRAIN RESEARCH REVIEWS	2000	33	2-3	380	389		10.1016/S0165-0173(00)00037-0
127	BOULU, P; DEHEN, H	MOTOR EVOKED-POTENTIALS	Due to the motor evoked potentials recorded in limb muscles after transcranial and spinal magnetic stimulation, conduction in the central motor pathways can now be evaluated safely and painlessly in man. The central motor conduction time obtained includes the time required for transmission, along the fast pyramidal fibres, from the cortex to the spinal motoneurons, the synaptic transmission to mo…	N	Short results - no clinical measures	N		N		PRESSE MEDICALE			PARIS 06	120 BLVD SAINT-GERMAIN, 75280 PARIS 06, FRANCE	0755-4982	JAN 30	1993
128	Boutieandre C., Rey C., Zaaraoui W., Le Troter A., Rico A., Crespy L., Achard S., Reuter F., Pariollaud F., Wirsich J., Asquinazi P., Confort-Gouny S., Soulier E., Guye M., Pelletier J., Ranjeva J.-P., Audoin B.	Improvement of spasticity following intermittent theta burst stimulation in multiple sclerosis is associated with modulation of resting-state functional connectivity of the primary motor cortices	Background: Intermittent theta burst stimulation (iTBS) of the primary motor cortex improves transiently lower limbs spasticity in multiple sclerosis (MS). However, the cerebral mechanisms underlying this effect have never been investigated. Objective: To assess whether modulation of spasticity induced by iTBS is underlined by functional reorganization of the primary motor cortices. Methods: A to…	N	No clinical data (EDSS); motor unit	N	No healthy control group	N		Multiple Sclerosis (2017) 23:6 (855-863). Date of Publication: 1 May 2017							10.1177/1352458516661640
131	Boylan, LS; Sackeim, HA	Magnetoelectric brain stimulation in the assessment of brain physiology and pathophysiology	Objective: To review findings from transcranial magnetic stimulation (TMS)-induced motor evoked potentials in normal subjects, in various neurological diseases and with pharmacologic manipulation. Methods: MEDLINE was searched to identify pertinent articles and articles referenced therein were also reviewed. Results: TMS is a safe and non-invasive technique which has been used widely in the study…	Y		R		R		CLINICAL NEUROPHYSIOLOGY	2000	111	3	504	512		10.1016/S1388-2457(99)00280-1
132	BRAU, H; BAUM, K; REISCHIES, FM; SCHORNER, W; STOLZEL, R	CORTICAL SOMATOSENSORY EVOKED-POTENTIALS OF SHORT AND INTERMEDIATE LATENCY FOLLOWING MEDIAN AND TIBIAL NERVE-STIMULATION IN COMPARISON WITH NUCLEAR-MAGNETIC-RESONANCE IMAGING (NMR) IN MULTIPLE-SCLEROSIS		N	poster session	N	Not English	N		EEG-EMG-ZEITSCHRIFT FUR ELEKTROENZEPHALOGRAPHIE ELEKTROMYOGRAPHIE UND VERWANDTE GEBIETE			STUTTGART	P O BOX 30 11 20, D-70451 STUTTGART, GERMANY	0941-3790	DEC	1986
134	Bridoux A., Créange A., Ayache S., Hosseini H., Noroc A., Fahrat W., Lefaucheur J.P., Drouot X.	Loss of restorative properties of sleep in multiple sclerosis fatigue	Rationale: Multiple sclerosis (MS) patients experience constant, severe and postexercise, fatigue (Iriarte et al. 2000). Disturbed sleep is common in patients with MS and is likely to contribute to greater fatigue. Nevertheless, the subjectively assessed fatigue is not correlated with severity of disturbed sleep (Kaynak et al, 2000). The modulation of motor cortex excitability after exercise can …	N	Poster abstract	N	Conference	N	Conference	Fundamental and Clinical Pharmacology (2013) 27 SUPPL. 1 (51). Date of Publication: June 2013							10.1111/fcp.12026
135	Bridoux, A; Creange, A; Sangare, A; Ayache, SS; Hosseini, H; Drouot, X; Lefaucheur, JP	Impaired sleep-associated modulation of post-exercise corticomotor depression in multiple sclerosis	Objective: To compare the beneficial effect of nap versus rest on the recovery of motor evoked potentials (MEPs) after a fatiguing exercise performed in patients with multiple sclerosis (MS) and healthy controls. Methods: In 12 MS patients and 12 healthy controls, MEPs were recorded from the adductor pollicis muscle before, 10 and 60 mm (TO, T10, and T60) after an effort of thumb adduction at 25%…	Y		Y		Y		JOURNAL OF THE NEUROLOGICAL SCIENCES	2015	354	1-2	91	96		10.1016/j.jns.2015.05.006
136	BRITTON, TC; MEYER, BU; BENECKE, R	VARIABILITY OF CORTICALLY EVOKED MOTOR-RESPONSES IN MULTIPLE-SCLEROSIS	The calculated central motor conduction time (CMCT), onset latency variability (expressed as the mean consecutive difference; MCD) and amplitude (expressed as percentage of maximum peripheral M wave size) of electromyographic (EMG) responses in the first dorsal interosseous (FDI) muscle following magnetic motor cortex stimulation were investigated in 20 normal subjects and 21 patients with multip…	N	Clinical data? Type, duration, Strength?	N	No EDSS	N	No EDSS	ELECTROENCEPHALOGRAPHY AND CLINICAL NEUROPHYSIOLOGY			CLARE	CUSTOMER RELATIONS MANAGER, BAY 15, SHANNON INDUSTRIAL ESTATE CO, CLARE, IRELAND	0013-4694	JUN	1991
137	BRITTON, TC; MEYER, BU; BENECKE, R	CENTRAL MOTOR PATHWAYS IN PATIENTS WITH MIRROR MOVEMENTS	Central motor pathways were investigated in three patients with congenital mirror movements using magnetic motor cortex stimulation. Response thresholds, amplitudes and latencies were normal. The projection of the corticomotoneuronal pathways was assessed by placing the coil over the vertex and comparing the size of responses in the first dorsal interosseous (FDI) muscles evoked by clockwise and …	U	Recruitment and diagnosis not fully detailed	N	Healthy controls only	N		JOURNAL OF NEUROLOGY NEUROSURGERY AND PSYCHIATRY			LONDON	BRITISH MED ASSOC HOUSE, TAVISTOCK SQUARE, LONDON, ENGLAND WC1H 9JR	0022-3050	JUN	1991
138	Broadley, SA; Vanags, D; Williams, B; Johnson, B; Feeney, D; Griffiths, L; Shakib, S; Brown, G; Coulthard, A; Mullins, P; Kneebone, C	Results of a phase IIa clinical trial of an anti-inflammatory molecule, chaperonin 10, in multiple sclerosis	Background Chaperonin 10 (Cpn10) is a mitochondrial molecule involved in protein folding. The aim of this study was to determine the safety profile of Cpn10 in patients with multiple sclerosis (MS). Methods A total of 50 patients with relapse-remitting or secondary progressive MS were intravenously administered 5 mg or 10 mg of Cpn10 weekly for 12 weeks in a double-blind, randomized, placebo cont…	N	No clinical data (EDSS)	N	No TMS	N		MULTIPLE SCLEROSIS	2009	15	3	329	336		10.1177/1352458508099141
140	Brogmus, KE	Epileptic seizure induction by transcranial magnetic stimulation - A case report	A demented female patient aged 66 suffering from a normal pressure hydrocephalus and a chronic inflammatory process in the CNS - probably evidence of multiple sclerosis or possibly the result of borreliosis - suffered from a first secondarily generalised seizure occurring immediately after transcranial magnetic stimulation (TMS). It is likely that a focus previously showing in the EEG had been ac…	N	No clinical data (EDSS)	N	Epilepsy	N		AKTUELLE NEUROLOGIE			STUTTGART	P O BOX 30 11 20, D-70451 STUTTGART, GERMANY	0302-4350	JUN	1998
141	Brostrom S.	Can neurogenic incontinence be evaluated using functional magnetic stimulation?		N	No clinical data (EDSS)	N	No TMS	N		Nature Clinical Practice Urology (2005) 2:5 (224-225). Date of Publication: May 2005							10.1038/ncpuro0187
143	Brostrøm S.	Motor Evoked Potentials From the Pelvic Floor	Aims: Proper function of the lower urinary tract depends on the integrity of the central and peripheral nervous pathways on multiple levels, and the complexity of this system leaves it susceptible to even minor lesions. While dysfunction of the lower urinary tract is prevalent amongst patients with nervous system disease, e.g., multiple sclerosis (MS), most women with lower urinary tract dysfunct…	N	leg	N	Pelvic floor	N		Neurourology and Urodynamics (2003) 22:7 (620-637). Date of Publication: 2003							10.1002/nau.10151
144	Brostrom S., Frederiksen J.L., Jennum P., Lose G.	Motor evoked potentials from the pelvic floor in patients with multiple sclerosis	The use of motor evoked potentials (MEPs) to study the integrity of pelvic floor motor innervation is poorly described in the literature. This study evaluated the clinical use of pelvic floor MEPs in 16 women with multiple sclerosis. Lower urinary tract dysfunction was assessed with urodynamic investigations. Transcutaneous magnetic stimulation was applied over the motor cortex and spinal roots, …	N	Abstract	N	Pelvic floor	N		Journal of Neurology Neurosurgery and Psychiatry (2003) 74:4 (498-500). Date of Publication: 1 Apr 2003							10.1136/jnnp.74.4.498
148	Brostrom, S; Jennum, P; Lose, G	Motor evoked potentials from the striated urethral sphincter: A comparison of concentric needle and surface electrodes	The aim of this study is to compare two different surface electrodes (intravaginal and intraurethral) with the concentric needle as a criterion standard and concomitant testing of the levator ani as a potential contaminator. Methods: Thirty healthy women with a mean age of 52 years. Bland-Altman plots were used to compare recorded latencies from the various electrodes and muscles. Results: There …	U	Not there	N	Healthy controls only	N		NEUROUROLOGY AND URODYNAMICS	2003	22	2	123	129		10.1002/nau.10030
150	Brown T.M.	Sleep-Related Leg Cramps: A Review and Suggestions for Future Research	Various medications and behavioral treatments for sleep-related leg cramps have been tried, but the quality of the evidence is low. Quinine seems to be effective, but dangerous. β-Agonists may be one of the more common causes of secondary leg cramps. Statins may not be implicated in leg cramps as much as has been believed. Potassium-sparing diuretics may have a higher incidence of sleep-related l…	Y		N	No TMS	N		Sleep Medicine Clinics (2015) 10:3 (385-392). Date of Publication: 1 Sep 2015							10.1016/j.jsmc.2015.05.002
151	Brown, LN; Zhang, Y; Mitchell, JR; Zabad, R; Metz, LM	Corpus Callosum Volume and Interhemispheric Transfer in Multiple Sclerosis	Background: The corpus callosum (CC) is frequently compromised in patients with multiple sclerosis (MS). Structural and functional measurements of the CC may be useful to monitor the progression of the disease. The aim of this pilot study was to determine if bimanual tactile temporal thresholds correlates with CC volume. A tactile temporal threshold is the longest temporal interval that separates…	U	No clinical data (EDSS) but force measurements	N	No TMS	N		CANADIAN JOURNAL OF NEUROLOGICAL SCIENCES	2010	37	5	615	619
152	Brum M., Cabib C., Valls-Solé J.	Clinical value of the assessment of changes in MEP duration with voluntary contraction	Transcranial magnetic stimulation (TMS) gives rise to muscle responses, known as motor evoked potentials (MEP), through activation of the motor pathways. Voluntary contraction causes facilitation of MEPs, which consists of shortening MEP latency, increasing MEP amplitude and widening MEP duration. While an increase in excitability of alpha motorneurons and the corticospinal tract can easily expla…	U	mean Expanded Disability Status Scale of 3.5 (range between 2 and 6)..no SD?	U	Demographics presented only for newly recruited controls.	N	No patient demographics	Frontiers in Neuroscience (2016) 9:JAN Article Number: 505. Date of Publication: 2016							10.3389/fnins.2015.00505
154	Buchner, H	The "Old" and the "New" Status of Evoked Potentials in the Diagnosis and Prognosis of Multiple Sclerosis	Evoked potentials are established to be sensitive tools to detect demyelinisation along a central pathway by recording prolonged latencies. Thus, evoked potentials can detect clinically silent lesions, can verify weak symptoms and help to differentiate between axonal and demyelinating lesions. This potential is of special importance in the case of a clinically isolated syndrome where evoked poten…	N	No clinical data (EDSS)	N	German	N	NOT ENGLISH	KLINISCHE NEUROPHYSIOLOGIE	2013	44	3	187	192		10.1055/s-0033-1343473
155	Bühler R., Magistris M.R., Truffert A., Hess C.W., Rösler K.M.	The triple stimulation technique to study central motor conduction to the lower limbs	Objective: To quantify the percentage of motor units of a foot muscle that can be activated by transcranial magnetic stimulation (TMS) in normal subjects and patients. Methods: We adapted the recently described triple stimulation technique (TST) for recordings from abductor hallucis (AH). Conventional motor evoked potentials (MEPs) of this muscle are usually small and variable in shape, because o…	N	Diagnoses - neurologists or criteria	N	No clinical measures	N	No clinical measures	Clinical Neurophysiology (2001) 112:5 (938-949). Date of Publication: 2001							10.1016/S1388-2457(01)00506-5
158	Cabib, C; Llufriu, S; Casanova-Molla, J; Saiz, A; Valls-Sole, J	Defective sensorimotor integration in preparation for reaction time tasks in patients with multiple sclerosis	Slowness of voluntary movements in patients with multiple sclerosis (MS) may be due to various factors, including attentional and cognitive deficits, delays in motor conduction time, and impairment of specific central nervous system circuits. In 13 healthy volunteers and 20 mildly disabled, relapsing-remitting MS patients, we examined simple reaction time (SRT) tasks requiring sensorimotor integr…	N	Clinically isolated syndrome	N	No TMS	N		JOURNAL OF NEUROPHYSIOLOGY	2015	113	5	1462	1469		10.1152/jn.00591.2014
159	Cabib, C; Llufriu, S; Martinez-Heras, E; Saiz, A; Valls-Sole, J	Enhanced mirror activity in 'crossed' reaction time tasks in multiple sclerosis	Objective: Execution of unimanual voluntary motor tasks requires appropriate inhibitory control over contralateral motor output. Such inhibition should involve interhemispheric connections, which are often damaged in multiple sclerosis (MS). Methods: Twenty mildly-disabled MS patients and 13 healthy subjects performed ipsilateral and contralateral wrist-extension reactions (IR and CR, respectivel…	U	Not there	N	No TMS	N		CLINICAL NEUROPHYSIOLOGY	2016	127	4	2001	2009		10.1016/j.clinph.2016.01.017
162	Caliandro P., Padua L., Sta˚lberg E., Giannini F., Greco G., Bianco G., Polizzotto N., Erra C., Rossi S.	Comparison between peripheral jitter and central jitter induced by repetitive transcranial magnetic stimulation	Introduction: Each TMS pulse activates corticospinal axons trans-synaptically, through the firing of cortical interneurons of superficial layers. A temporal summation of these converging inputs is necessary to produce descending corticospinal volleys. These factors may account for a different timing of activation of corticospinal pyramidal neurons from one TMS pulse to another. Objectives: To qua…	N	Needles electrodes?	N	Baseline TMS data not compared	N	Baseline TMS data not compared	Clinical Neurophysiology (2011) 122 SUPPL. 1 (S143). Date of Publication: June 2011							10.1016/S1388-2457(11)60512-9
164	Caliandro, P; Padua, L; Rossi, A; Rossini, PM; Stalberg, E; Feurra, M; Ulivelli, M; Bartalini, S; Giannini, F; Rossi, S	Jitter of Corticospinal Neurons During Repetitive Transcranial Magnetic Stimulation. Method and Possible Clinical Implications	Background: Repetitive transcranial magnetic stimulation (rTMS) of the motor cortex activates corticospinal neurons mainly through the depolarization of cortico-cortical axons belonging to interneurons of superficial layers. Objective: We used single-fiber electromyography (SFEMG) to estimate the "central jitter" of activation latency of interneural pools from one pulse of TMS to another. Methods…	N	Editorial commentary	Y		N	SINGLE MOTOR UNIT	BRAIN STIMULATION	2014	7	4	580	586		10.1016/j.brs.2014.05.001
165	Canellas, AR; del Cerro, JM	Functional magnetic resonance imaging in multiple sclerosis	Functional magnetic resonance imaging (fMRI) is a noninvasive tool that makes it possible to visualize brain areas that are activated in relationship to a specific task or stimulus. One of its most common clinical uses is presurgical identification of functionally critical areas in order to help the neurosurgeon select the safest route. In the research field fMRI is also being used to study norma…	U	Not there	N	No TMS	N		NEUROLOGIA	2007			16	21
166	Canham L., Cottrell D., Kane N., Witherick J., Blake K., Walsh P.	A multi-modal neurophysiological evaluation of primary progressive multiple sclerosis-a cross sectional & longitudinal cohort analysis	OBJECTIVE: To evaluate the use of results from combined multi-modal evoked potential studies as a surrogate marker of disease severity in Primary Progressive Multiple Sclerosis.BACKGROUND: The practical difficulties inherent in the recruitment and maintenance of sustained participation of a sufficient number of patients with primary progressive disease to enable adequate statistical power in clin…	N	Abstract?	N	Conference	N	Conference	Neurology (2014) 82:10 SUPPL. 1. Date of Publication: 8 Apr 2014
167	Canham L., Kane N., Oware A., Walsh P., Blake K., Homewood J., Kent D., Dineen R., Morgan P., Nikos E., Samaraweera A., Witherick J., Inglis K., Cottrell D.	Localising the lesion in fatigue insights from primary progressive multiple sclerosis	OBJECTIVE: To answer the question of whether the burden of fatigue in Multiple Sclerosis is primarily a consequence of Corticospinal damage and variable functional performance therein or a phenomena related to mischief at higher levels of cerebral function. BACKGROUND: Fatigue is a common and limiting symptom of Multiple Sclerosis for which there exists only a small range of interventions of mode…	N	Abstract?	N	Conference	N	Conference	Neurology (2015) 84 SUPPL. 14. Date of Publication: 6 Apr 2015
168	Canham L., Kane N., Oware A., Walsh P., Blake K., Homewood J., Witherick J., Inglis K., Cottrell D.	Waveform entropy of motor evoked potentials-a sensitive indicator of corticospinal tract damage	OBJECTIVE: To provide the first assessment of the utility of Shannon Entropy as an objective measure of Motor Evoked Potential (MEP) waveform morphology disturbance in the context of Multiple Sclerosis. BACKGROUND: In addition to prolongation of central motor conduction latency Motor Evoked Potentials elicited within Multiple Sclerosis, patients are frequently observed to exhibit subjectively gre…	N	Abstract?	N	Conference	N	Conference	Neurology (2015) 84 SUPPL. 14. Date of Publication: 6 Apr 2015
169	Canham L.J.W., Kane N., Oware A., Peter W., Macey K., Witherick J., Inglis K., Faulkner H., Cottrell D.A.	Longitudinal performance of multi-modal evoked potentials as a biomarker of disability in primary progressive multiple sclerosis	Background: A biomarker surrogate of physical disability in Primary Progressive Multiple Sclerosis is desired to aid translational research. Composite scores from Multi-Modality Evoked Potential batteries have demonstrated impressive correlation with disability in cross-sectional studies. Objective: We sought to evaluate the ability of Multi-Modality Evoked Potential (MMEP) batteries to reflect a…	U	"diagnosis of definite relapsing-remititng (RR)"	N	No healthy control group	N		Multiple Sclerosis (2015) 23:11 SUPPL. 1 (516-517). Date of Publication: September 2015							10.1177/1352458515602642
170	Cantello, R; Tarletti, R; Civardi, C	Transcranial magnetic stimulation and Parkinson's disease	While motor cortical areas are the main targets of the integrative activity of basal ganglia, their main output consists of the corticospinal system. Transcranial magnetic stimulation (TMS), a relatively new method to investigate corticospinal physiology, has been widely used to assess possible changes secondary to Parkinson's disease (PD). The use of single- and paired-pulse TMS, two varieties o…	U	Report change in EDSS but can't see figure (no means)	N	Parkinson's Disease	N		BRAIN RESEARCH REVIEWS	2002	38	3	309	327	PII S0165-0173(01)00158-8	10.1016/S0165-0173(01)00158-8
171	Caramia M.D., Palmieri M.G., Desiato M.T., Boffa L., Galizia P., Rossini P.M., Centonze D., Bernardi G.	Brain excitability changes in the relapsing and remitting phases of multiple sclerosis: A study with transcranial magnetic stimulation	Objective: Recent functional and imaging studies have substantially contributed to extend the concept of multiple sclerosis (MS), classically regarded as a disease limited to the myelin axonal sheath. Several findings, in fact, point to a parallel involvement of neuronal components of the central nervous system (CNS) in the course of MS. In the present study, therefore, we explored, in MS patient…	Y		N	No healthy control group	N		Clinical Neurophysiology (2004) 115:4 (956-965). Date of Publication: April 2004							10.1016/j.clinph.2003.11.024
174	Caramia, F; Francia, A; Mainero, C; Tinelli, E; Palmieri, MG; Colonnese, C; Bozzao, L; Caramia, MD	Neurophysiological and functional MRI evidence of reorganization of cortical motor areas in cerebral arteriovenous malformation	Functional magnetic resonance imaging (fMRI) research has shown that brain arteriovenous malformations (AVMs) lead to reorganization of cortical motor areas. Since it is known that blood oxygenation level-dependent signal in fMRI may be influenced by the hemodynamic Perturbation associated with the presence of the AVM, in the present Study, a combined exploration with fMRI and transcranial magnet…	Y		N	No TMS	N		MAGNETIC RESONANCE IMAGING	2009	27	10	1360	1369		10.1016/j.mri.2009.05.029
175	CARAMIA, MD; CICINELLI, P; PARADISO, C; MARIORENZI, R; ZAROLA, F; BERNARDI, G; ROSSINI, PM	EXCITABILITY CHANGES OF MUSCULAR RESPONSES TO MAGNETIC BRAIN-STIMULATION IN PATIENTS WITH CENTRAL MOTOR DISORDERS	The 'excitability' and 'conductivity' of motor pathways during transcranial stimulation (TCS) have been investigated in 49 patients affected by multiple sclerosis (34), amyotrophic lateral sclerosis (7), spino-cerebellar ataxia (3), primary lateral sclerosis (4) and brain metastasis (1). Hyper-reflexia, spasticity and weakness were correlated with the central motor conduction time (CCT) and with …	N	Poster session	N	No healthy control group	N		ELECTROENCEPHALOGRAPHY AND CLINICAL NEUROPHYSIOLOGY			CLARE	CUSTOMER RELATIONS MANAGER, BAY 15, SHANNON INDUSTRIAL ESTATE CO, CLARE, IRELAND	0013-4694	AUG	1991
176	Carbajal, KS; Mironova, Y; Ulrich-Lewis, JT; Kulkarni, D; Grifka-Walk, HM; Huber, AK; Shrager, P; Giger, RJ; Segal, BM	Th Cell Diversity in Experimental Autoimmune Encephalomyelitis and Multiple Sclerosis	Multiple sclerosis (MS) is believed to be initiated by myelin-reactive CD4(+) Th cells. IL-12-polarized Th1 cells, IL-23-polarized Th17 cells, and Th17 cells that acquire Th1 characteristics were each implicated in autoimmune pathogenesis. It is debated whether Th cells that can drive the development of demyelinating lesions are phenotypically diverse or arise from a single lineage. In the curren…	Y		N	No TMS	N		JOURNAL OF IMMUNOLOGY	2015	195	6	2552	2559		10.4049/jimmunol.1501097
178	Cárdenas-Morales L., Nowak D.A., Kammer T., Wolf R.C., Schönfeldt-Lecuona C.	Mechanisms and applications of theta-burst rTMS on the human motor cortex	Theta-burst Stimulation (TBS) is a novel form of repetitive transcranial magnetic stimulation (rTMS). Applied over the primary motor cortex it has been successfully used to induce changes in cortical excitability. The advantage of this stimulation paradigm is that it is able to induce strong and long lasting effects using a lower stimulation intensity and a shorter time of stimulation compared to…	N	No healthy control group	N	Irrelevant Review	N		Brain Topography (2010) 22:4 (294-306). Date of Publication: January 2010							10.1007/s10548-009-0084-7
179	Cash R.F.H., Ziemann U., Murray K., Thickbroom G.W.	Late cortical disinhibition in human motor cortex: A triple-pulse transcranial magnetic stimulation study	In human motor cortex transcranial magnetic stimulation (TMS) has been used to identify short-interval intracortical inhibition (SICI) corresponding to γ-aminobutyric acid type A (GABA(A)) effects and long-interval intracortical inhibition (LICI) and the cortical silent period (SP) corresponding to postsynaptic GABA(B) effects. Presynaptic GABA (B) effects, corresponding to disinhibition, can als…	N	No healthy control group	N	Healthy controls only	N		Journal of Neurophysiology (2010) 103:1 (511-518). Date of Publication: January 2010							10.1152/jn.00782.2009
181	Catano, A; Houa, M; Noel, P	Magnetic transcranial stimulation: Dissociation of excitatory and inhibitory mechanisms in acute strokes	Magnetic transcranial stimulation was applied to 12 normal subjects and 30 patients (24 acute and 6 chronic) with hemiparesis contralateral to an ischaemic stroke. In the 24 acute patients, the recordings were made at the 7th day on the contralateral first dorsal interosseous (FDI) muscle. We studied the amplitudes of the motor evoked potential (MEP) responses and the post-MEP silent period durat…	N	No healthy control group	N	Ischaemic Stroke	N		ELECTROMYOGRAPHY AND MOTOR CONTROL-ELECTROENCEPHALOGRAPHY AND CLINICAL NEUROPHYSIOLOGY			CLARE	CUSTOMER RELATIONS MANAGER, BAY 15, SHANNON INDUSTRIAL ESTATE CO, CLARE, IRELAND	0924-980X	FEB	1997
182	Centonze D.	Synaptic hyperexcitability mediated by interleukin-1β in multiple sclerosis	Soluble mediators of inflammation such as tumor necrosis factor-α (TNF-α) and interleukin-1β (IL-1β) have the property of enhancing glutamate transmission in vitro, and represent therefore potential candidates for inflammation-triggered abnormal synaptic functioning in multiple sclerosis (MS) brains. To see whether soluble mediators of inflammation in MS have the property of altering synaptic tra…	N	aged 16 to 65 years	N	No TMS	N		Clinical Neurophysiology (2011) 122 SUPPL. 1 (S28). Date of Publication: June 2011							10.1016/S1388-2457(11)60088-6
184	Centonze D., Koch G., Versace V., Mori F., Rossi S., Brusa L., Grossi K., Torelli F., Prosperetti C., Cervellino A., Marfia G.A., Stanzione P., Marciani M.G., Boffa L., Bernardi G.	Repetitive transcranial magnetic stimulation of the motor cortex ameliorates spasticity in multiple sclerosis	OBJECTIVE: To investigate whether repetitive transcranial magnetic stimulation (rTMS) can modify spasticity. METHODS: We used high-frequency (5 Hz) and low-frequency (1 Hz) rTMS protocols in 19 remitting patients with relapsing-remitting multiple sclerosis and lower limb spasticity. RESULTS: A single session of 1 Hz rTMS over the leg primary motor cortex increased H/M amplitude ratio of the soleu…	N	leg	N	No healthy control group	N		Neurology (2007) 68:13 (1045-1050). Date of Publication: March 2007							10.1212/01.wnl.0000257818.16952.62
185	Centonze D., Petta F., Versace V., Rossi S., Torelli F., Prosperetti C., Rossi St., Marfia G.A., Bernardi G., Koch G., Miano R., Boffa L., Finazzi-Agrò E.	Effects of motor cortex rTMS on lower urinary tract dysfunction in multiple sclerosis	We tested the effects of 5-Hz rTMS over the motor cortex in multiple sclerosis (MS) subjects complaining of lower urinary tract symptoms either in the filling or voiding phase. Our data show that motor cortex stimulation for five consecutive days over two weeks ameliorates the voiding phase of the micturition cycle, suggesting that enhancing corticospinal tract excitability might be useful to ame…	N	Poster session	N	Urinary tract dysfunction	N		Multiple Sclerosis (2007) 13:2 (269-271). Date of Publication: March 2007							10.1177/1352458506070729
188	Cerri, G; Cocchi, CA; Montagna, M; Zuin, M; Podda, M; Cavallari, P; Selmi, C	Patients with primary biliary cirrhosis do not show post-exercise depression of cortical excitability	Objective: Primary biliary cirrhosis (PBC), a female-predominant autoimmune liver disease, is commonly associated with fatigue, a sensation of weariness from physical activity. In healthy subjects, motor evoked potentials (MEPs) elicited by transcranial magnetic stimulation (TMS) increase in amplitude during fatiguing exercise and decrease after the exercise due to post-contraction cortical excit…	N	Poster session	N	Primary biliary cirrhosis	N		CLINICAL NEUROPHYSIOLOGY	2010	121	8	1321	1328		10.1016/j.clinph.2009.12.040
189	Chalah M.A., Riachi N., Ahdabt R., Créanget A., Lefaucheur J.-P., Ayache S.S.	Fatigue in multiple sclerosis: Neural correlates and the role of non-invasive brain stimulation	Multiple sclerosis (MS) is a chronic progressive inflammatory disease of the central nervous system (CNS) and the major cause of non-traumatic disability in young adults. Fatigue is a frequent symptom reported by the majority of MS patients during their disease course and drastically affects their quality of life. Despite its significant prevalence and impact, the underlying pathophysiological me…	N	Poster session	R		R		Frontiers in Cellular Neuroscience (2015) 9:NOV Article Number: 460. Date of Publication: 30 Nov 2015							10.3389/fncel.2015.00460
191	Chalah, MA; Riachi, N; Ahdab, R; Mhalla, A; Abdellaoui, M; Creange, A; Lefaucheur, JP; Ayache, SS	Effects of left DLPFC versus right PPC tDCS on multiple sclerosis fatigue	Background and objective: Fatigue is a frequent and debilitating symptom in patients with multiple sclerosis (MS). Its classical treatments are still faced with limited benefits and numerous side effects. Hence, we aimed to evaluate the effects of transcranial direct current stimulation (tDCS), a noninvasive brain stimulation technique, on such a challenging symptom. Our secondary outcomes includ…	N	Strange inclusion (not sure if all MS?)	N	No TMS	N		JOURNAL OF THE NEUROLOGICAL SCIENCES	2017	372		131	137		10.1016/j.jns.2016.11.015
192	Chalkias, S; Dang, X; Bord, E; Stein, MC; Kinkel, RP; Sloane, JA; Donnelly, M; Ionete, C; Houtchens, MK; Buckle, GJ; Batson, S; Koralnik, IJ	JC Virus Reactivation during Prolonged Natalizumab Monotherapy for Multiple Sclerosis	Objective: To determine the prevalence of JC virus (JCV) reactivation and JCV-specific cellular immune response during prolonged natalizumab treatment for multiple sclerosis (MS). Methods: We enrolled 43 JCV-seropositive MS patients, including 32 on natalizumab monotherapy >18 months, 6 on interferon beta-1a monotherapy >36 months, and 5 untreated controls. We performed quantitative real-time pol…	N	Progressive group all multiple patients	N	No TMS	N		ANNALS OF NEUROLOGY	2014	75	6	925	934		10.1002/ana.24148
193	Chang, CW; Lin, SM	Measurement of motor conduction in the thoracolumbar cord - A possible predictor of surgical outcome in cervical spondylotic myelopathy	Study Design. A prospective motor-evoked potential study with measurement of spinal cord motor conduction velocity in the thoracolumbar cord was performed before and after decompression surgery in 30 patients with cervical spondylotic myelopathy. Objectives. To evaluate the neurofunctional integrity of the spinal motor pathways in cervical spondylotic myelopathy in patients compared with age-matc…	N	Abstract	N	Cervical spondylotic myelopathy	N		SPINE			PHILADELPHIA	227 EAST WASHINGTON SQ, PHILADELPHIA, PA 19106	0362-2436	FEB 15	1996
194	Chen R.	Diagnostic utility of TMS	Transcranial magnetic stimulation has demonstrated or potential clinical utility in several neurological disorders. In amyotrophic lateral sclerosis, measurement of central motor conduction time (CMCT) can detect upper motor neuron involvement. The sensitivity may be increased by combining with other parameters such as the motor threshold, silent period duration or by using the triple stimulation…	N	Abstract	R		R		Clinical Neurophysiology (2014) 125 SUPPL. 1 (S4). Date of Publication: June 2014
197	Chen, DQ; Strauss, I; Hayes, DJ; Davis, KD; Hodaie, M	Age-Related Changes in Diffusion Tensor Imaging Metrics of Fornix Subregions in Healthy Humans	Objective: White matter diffusivity measures of the fornix change with aging, which likely relates to changes in memory and cognition in older adults. Subregional variations in forniceal diffusivity may exist, given its heterogeneous anatomy and connectivity; however, these have not been closely examined in vivo. We examined diffusivity parameters (fractional anisotropy, FA; radial diffusivity, R…	N	No clinical data	N	No TMS	N		STEREOTACTIC AND FUNCTIONAL NEUROSURGERY	2015	93	3	151	159		10.1159/000368442
198	Chen, R; Cros, D; Curra, A; Di Lazzaro, V; Lefaucheur, JP; Magistris, MR; Mills, K; Roesler, KM; Triggs, WJ; Ugawa, Y; Ziemann, U	The clinical diagnostic utility of transcranial magnetic stimulation: Report of an IFCN committee	The review focuses on the clinical diagnostic utility of transcranial magnetic stimulation (TMS). The central motor conduction time (CMCT) is a sensitive method to detect myelopathy and abnormalities may be detected in the absence of radiological changes. CMCT may also detect upper motor neuron involvement in amyotrophic lateral sclerosis. The diagnostic sensitivity may be increased by using the …	N	17 to 56 years	R		R		CLINICAL NEUROPHYSIOLOGY	2008	119	3	504	532		10.1016/j.clinph.2007.10.014
199	Chen, WT; Ko, YC; Liao, KK; Hsieh, JC; Yeh, TC; Wu, ZA; Ho, LT; Lin, YY	Optimal check size and reversal rate to elicit pattern-reversal MEG responses	Objective: To determine the impact of check size and interstimulus interval (ISI) on neuromagnetic visual cortical responses. Methods: We recorded visual evoked fields to pattern-reversal stimulation with central occlusion in ten subjects. The similar to 100 ms magnetic activation (P100m) was analyzed by single dipole modeling. Results: With Is ISI, P100m strengths increased as check size increas…	N	from 17 to 48 years	N	No TMS	N		CANADIAN JOURNAL OF NEUROLOGICAL SCIENCES	2005	32	2	218	224
200	Chervyakov A., Peresedova A., Poydasheva A., Korzhova J., Savitskaya N., Chernikova L., Gnezditsky V., Zavalishin I., Piradov M.	Navigated repetitive transcranial magnetic stimulation in treatment of spasticity	Introduction: Our aim is to assess the efficacy of different types of navigated repetitive transcranial magnetic stimulation (rTMS) in modulating lower limb spasticity. Methods: 15 patients (10 males, 5 females, mean age 46±8.6 years) with secondary progressive multiple sclerosis and lower spastic paraparesis received 10 sessions rTMS over the motor hotspot of the tibialis anterior muscle in the …	N	Tib An	N	No healthy control group	N		European Journal of Neurology (2014) 21 SUPPL. 1 (220). Date of Publication: May 2014
203	Cheshire Jr. W.P.	Trigeminal neuralgia: For one nerve a multitude of treatments	Trigeminal neuralgia (TN) is reputed to be one of the most painful conditions in human experience. Thus, many treatments, both medical and surgical, have been developed for this relapsing and remitting, paroxysmal stabbing or electrical, facial pain syndrome. The likely etiology in many cases is vascular compression of the trigeminal nerve root entry zone, leading to focal demyelination and aberr…	N	Conference	N	No TMS	N		Expert Review of Neurotherapeutics (2007) 7:11 (1565-1579). Date of Publication: November 2007							10.1586/14737175.7.11.1565
204	Chiou, SY; Hellyer, PJ; Sharp, DJ; Newbould, RD; Patel, MC; Strutton, PH	Relationships between the integrity and function of lumbar nerve roots as assessed by diffusion tensor imaging and neurophysiology	Diffusion tensor imaging (DTI) has shown promise in the measurement of peripheral nerve integrity, although the optimal way to apply the technique for the study of lumbar spinal nerves is unclear. The aims of this study are to use an improved DTI acquisition to investigate lumbar nerve root integrity and correlate this with functional measures using neurophysiology. Twenty healthy volunteers unde…	N	Conference	N	Healthy controls only	N		NEURORADIOLOGY	2017	59	9	893	903		10.1007/s00234-017-1869-0
205	Cho, JY; Sung, JJ; Min, JH; Lee, KW	Clinical utility of trapezius muscle studies in the evaluation of amyotrophic lateral sclerosis	Needle electromyography (EMG) and determining the motor evoked potential (MEP) of the genioglossus (tongue) are difficult to perform in evaluation of the craniobulbar region in patients with amyotrophic lateral sclerosis (ALS). Needle EMG and MEP determination in the upper trapezius were carried out in 17 consecutive ALS patients. The needle EMG parameters recorded included abnormal spontaneous a…	N	leg	N	ALS	N		JOURNAL OF CLINICAL NEUROSCIENCE	2006	13	9	908	912		10.1016/j.jocn.2006.01.044
206	Chollet F.	Pharmacologic modulation of human cerebral activity: Contribution of functional neuroimaging	This article highlights the following: (1) How the tools of functional neuroimaging analyze the effect of drug therapy on the central nervous system; (2) how the interactions between the drugs and the cortical neuronal networks have illustrated new aspects of the concepts of cerebral neuroplasticity; and (3) how functional neuroimaging has proved to be a valuable tool in understanding the mechani…	N	leg	N	Irrelevant Review	N		Neuroimaging Clinics of North America (2001) 11:2 (375-380). Date of Publication: 2001
208	Christensen, PB; Nielsen, JF; Sinkjaer, T	Quantification of hyperreflexia in amyotrophic lateral sclerosis (ALS) by the soleus stretch reflex	The aim of this study was to quantify upper motor neuron (UMN) involvement in amyotrophic lateral sclerosis (ALS) by the soleus stretch reflex. METHODS: In a group of 24 ALS patients and ten healthy controls the soleus stretch reflex was elicited by a four degree rotation at the ankle joint Amplitude of the short-latency stretch reflex, threshold, and sensitivity were determined. Peripheral excit…	N	No clinical data (EDSS)	N	ALS	N		AMYOTROPHIC LATERAL SCLEROSIS AND OTHER MOTOR NEURON DISORDERS	2003	4	2	106	111		10.1080/14660820310012754
209	Ciccarelli, O; Toosy, AT; Hickman, SJ; Parker, GJM; Wheeler-Kingshott, CAM; Miller, DH; Thompson, AJ	Optic radiation changes after optic neuritis detected by tractography-based group mapping	Postmortem data suggest that trans-synaptic degeneration occurs in the lateral geniculate nucleus after optic nerve injury. This study investigated in vivo the optic radiations in patients affected by optic neuritis using fast marching tractography (FMT), a diffusion magnetic resonance imaging (MRI) fiber tracking method, and group mapping techniques, which allow statistical comparisons between s…	N	Poster session	N	Optic nerve injury	N		HUMAN BRAIN MAPPING	2005	25	3	308	316		10.1002/hbm.20101
210	Claßen J.	Neuroplasticity in MS (#152)	Multiple Sclerosis (MS) leads to demyelinating and axonal injury of the central nervous system. A significant portion of the brain injury in MS is chronically progressive allowing gradual adaptation mechanisms to compensate for dysfunctional neuronal substrate. The presence of such mechanisms is suggested by the fact that disability may not easily be deduced from structural markers of brain lesio…	N	Poster session	N		N		Multiple Sclerosis (2012) 18:5 (S9). Date of Publication: May 2012							10.1177/1352458512444204
211	Classen J., Gentner R.	Finger joint covariance patterns of TMS-evoked movements: A window into mechanisms of neural encoding of skills	Introduction: Motor skill emerges when practicing of movements enables the motor system to extract and store rules that facilitate the generation of future movements. Theory suggests that movements may be built from neuro-motor synergies (“modules”). An important extension of this hypothesis is that the very same modules represent the neuronal substrate for storing motor skills. Objectives: In no…	Y		N	Simulation	N		Clinical Neurophysiology (2011) 122 SUPPL. 1 (S55). Date of Publication: June 2011							10.1016/S1388-2457(11)60186-7
212	Classen, J; Zeller, D; Kampe, KA; Dang, S	Plasticity of the Motor System in Multiple Sclerosis	Multiple Sclerosis (MS) is associated with a chronic demyelinating and axonal injury to the central nervous system. Functional activation studies in MS patients have demonstrated that performance of simple motor tasks may activate non-canonical brain regions. Using virtual lesion induction by transcranial magnetic stimulation, it is possible to show that this activation is functionally relevant. …	N	Poster session	N		N		FORTSCHRITTE DER NEUROLOGIE PSYCHIATRIE	2009	77		S45	S48		10.1055/s-0028-1109594
213	Claus D., Weis M., Jahnke U., Plewe A., Brunholzl C.	Corticospinal conduction studied with magnetic double stimulation in the intact human	A group of 8 healthy normal subjects (24-36 years old, mean age 29 years) were investigated. Transcranial magnetic double stimulation of the motor cortex was carried out at different interstimulus intervals. With both stimuli suprathreshold, an attenuation of the test response was found at interstimulus intervals of less than 200 msec (target relaxed or contracted). The manifestation of this atte…	N	clinical data? No EDSS	N	Not all participants had definite MS	N	No EDSS	Journal of the Neurological Sciences (1992) 111:2 (180-188). Date of Publication: 1992							10.1016/0022-510X(92)90066-T
216	CLEARY, MA; WALTER, JH; WRAITH, JE; JENKINS, JPR; ALANI, SM; TYLER, K; WHITTLE, D	MAGNETIC-RESONANCE-IMAGING OF THE BRAIN IN PHENYLKETONURIA	Abnormalities of magnetic resonance imaging (MRI) of the brain occur in some patients with phenylketonuria but the clinical importance of this finding is not clear. In order to determine the frequency and functional significance of changes on MRI we investigated 77 adolescent and adult patients with phenylketonuria. Patients aged 14-49 years and taking a restricted diet of 1 g/kg protein underwen…	Y		N	PKU	N		LANCET			LONDON	42 BEDFORD SQUARE, LONDON, ENGLAND WC1B 3SL	0140-6736	JUL 9	1994
217	Clements, RJ; McDonough, J; Freeman, EJ	Distribution of parvalbumin and calretinin immunoreactive interneurons in motor cortex from multiple sclerosis post-mortem tissue	Parvalbumin (PV) and calretinin (CR) are calcium binding proteins (CBP's) expressed in discrete GABAergic interneuron populations in the human cortex. CBP's are known to buffer calcium concentrations and protect neurons from increases in intracellular calcium. Perturbations in intracellular calcium can activate proteolytic enzymes including calpain, leading to deleterious effects to axons. Ca++-m…	Y		N	Post-mortem	N		EXPERIMENTAL BRAIN RESEARCH	2008	187	3	459	465		10.1007/s00221-008-1317-9
218	Clerico, M; Contessa, G; Durelli, L	Interferon-beta(1a) for the treatment of multiple sclerosis	At present, two types of recombinant human interferon (IFN)-beta are in clinical use. IFN-beta(1a) is produced in genetically engineered Chinese hamster ovary cells, and its amino acid sequence and glycosylation pattern are identical to those of endogenous human IFN-beta. The beneficial effect of IFN-beta in multiple sclerosis (MS) probably results from different mechanisms of action, such as a d…	N	criteria? No official diagnosis	N	No TMS	N		EXPERT OPINION ON BIOLOGICAL THERAPY	2007	7	4	535	542		10.1517/14712598.7.4.535
219	Cocco E., Sardu C., Massa R., Mamusa E., Musu L., Ferrigno P., Melis M., Montomoli C., Ferretti V., Coghe G., Frau J., Lorefice L., Fenu G., Piras R., Aste R., Melis M., Contu P., Marrosu M.G.	Update of epidemiology of multiple sclerosis in southwestern Sardinia: Nature versus nurture	Background: Sardinia is a high risk area for MS; up to now, no epidemiological survey in the South is available. Aims to estimate prevalence, incidence, temporal trends and spatial clustering of MS in the South Western Sardinia (SWS). SWS has a genetically homogeneous population, excluding St Peter Island. Moreover SWS presents peculiar environment. Methods: All patients with MS were identified b…	U	not there	N	No TMS	N		Multiple Sclerosis (2010) 16:10 SUPPL. 1 (S212). Date of Publication: October 2010							10.1177/1352458510383204
220	Codecà C., Mori F., Kusayanagi H., Monteleone F., Boffa L., Paolillo A., Bernardi G., Koch G., Centonze D.	Differential patterns of interhemispheric functional disconnection in mild and advanced multiple sclerosis	Background: Patients with multiple sclerosis may present altered patterns of connectivity between the two brain hemispheres. To date, only transcallosal connectivity between the two primary motor cortices (M1) has been investigated functionally in patients with multiple sclerosis. Objectives: The aim of this study was to investigate whether connectivity between the dorsal premotor cortex and the …	Y		U	Demographics for controls not provided.	Y		Multiple Sclerosis (2010) 16:11 (1308-1316). Date of Publication: November 2010							10.1177/1352458510376957
223	COELHO, A; PRASHER, D	BRAIN-STEM POTENTIALS IN THE DIAGNOSIS OF AN ACOUSTIC NEUROMA - AN UNUSUAL CASE OF NORMAL IPSILATERAL AND ABNORMAL CONTRALATERAL RESPONSES	An unusual case is presented of a patient with an acoustic neuroma, in whom the responses recorded with the usual derivation of ipsilateral recording and stimulation resulted in a normal response, whereas that derived contralaterally was abnormal. The patient was also reported to have a normal magnetic resonance scan although the tomograms revealed a widening of the internal auditory meatus and s…	U	Physician recruited?	N	Acoustic neuroma	N		SCANDINAVIAN AUDIOLOGY			OSLO	PO BOX 2959 TOYEN, JOURNAL DIVISION CUSTOMER SERVICE, N-0608 OSLO, NORWAY	0105-0397		1990
224	Cohen-Adad, J; El Mendili, MM; Morizot-Koutlidis, R; Lehericy, S; Meininger, V; Blancho, S; Rossignol, S; Benali, H; Pradat, PF	Involvement of spinal sensory pathway in ALS and specificity of cord atrophy to lower motor neuron degeneration	Our objective was to demonstrate that ALS patients have sensory pathway involvement and that local cord atrophy reflects segmental lower motor neuron involvement. Twenty-nine ALS patients with spinal onset and twenty-one healthy controls were recruited. Diffusion tensor imaging (DTI), magnetization transfer and atrophy index were measured in the spinal cord, complemented with transcranial magneti…	U	Physician recruited?	N	ALS	N		AMYOTROPHIC LATERAL SCLEROSIS AND FRONTOTEMPORAL DEGENERATION	2013	14	1	30	38		10.3109/17482968.2012.701308
225	Collett, J; Meaney, A; Howells, K; Dawes, H	Acute recovery from exercise in people with multiple sclerosis: an exploratory study on the effect of exercise intensities	Purpose A better understanding of how people with multiple sclerosis (pwMS) recover from exercise may help inform interventions. Methods We explored physiological and perceptual responses following exercise of different intensities, using a crossover exposure-response design, in 14 adults with multiple sclerosis (MS) and 9 controls. A cycling exercise test determined maximum capacity (Wpeak). Par…	N	Leg?	N	Baseline TMS data not compared	N	Baseline TMS data not compared	DISABILITY AND REHABILITATION	2017	39	6	551	558		10.3109/09638288.2016.1152604
226	Colorado, RA; Shukla, K; Zhou, YX; Wolinsky, JS; Narayana, PA	Multi-task functional MRI in multiple sclerosis patients without clinical disability	While the majority of individuals with multiple sclerosis (MS) develop significant clinical disability, a subset experiences a disease course with minimal impairment even in the presence of significant apparent tissue damage on magnetic resonance imaging (MRI). Functional magnetic resonance imaging (fMRI) in MS patients with low disability suggests that increased use of the cognitive control syst…	N		N	No TMS	N		NEUROIMAGE	2012	59	1	573	581		10.1016/j.neuroimage.2011.07.065
227	Comi G., Galardi G., Filippi M., Sora M.G.N., Locatelli T., Martinelli V., Lia C., Visciani A.	Magnetic stimulation of motor cortex in MS: Correlations with clinical, SEP and brain MRI findings		N		N	Conference	N		Recent advances in Multiple Sclerosis therapy: proceedings of the Vth Congress of the European Committee for treatment and research in Multiple Sclerosis (ECTRIMS). ICS863 (1989) (309-310). Date of Publication: 1989
228	Comi, G; Leocani, L; Medaglini, S; Locatelli, T; Martinelli, V; Santuccio, G; Rossi, P	Measuring evoked responses in multiple sclerosis	Evoked potentials (EPs) have been widely utilised in Multiple Sclerosis (MS) patients to demonstrate the involvement of sensory and motor pathways. Their diagnostic value is based on the ability to reveal clinically silent lesions and to objectivate the central nervous system damage in patients who complain frequently of vague and indefinite disturbances which frequently occurs in the early phase…	N		N	Irrelevant Review	N		MULTIPLE SCLEROSIS			BASINGSTOKE	HOUNDMILLS, BASINGSTOKE RG21 6XS, HAMPSHIRE, ENGLAND	1352-4585	AUG	1999
229	Compston A.	Brain: Editorial		U		N	Editorial	N		Brain (2006) 129:8 (1933-1934). Date of Publication: Aug 2006							10.1093/brain/awl194
231	Conrad B., Lyttle B., Pawate S., Smith S.	Functional reorganization in multiple sclerosis at 7T: Altered connectivity and relationships to cognitive impairment	Objective: Quantify functional connectivity differences in patients with multiple sclerosis (MS) compared to controls and assess the relationship of these alterations to measures of cognitive performance. Background: Cognitive impairment is a common yet poorly understood symptom associated with MS. Functional connectivity analysis using resting-state fMRI (rs-fMRI) provides information about brai…	N		N	No TMS	N		Neurology (2016) 86:16 SUPPL. 1. Date of Publication: 5 Apr 2016
235	Conte, A; Lenzi, D; Frasca, V; Gilio, F; Giacomelli, E; Gabriele, M; Bettolo, CM; Iacovelli, E; Pantano, P; Pozzilli, C; Inghilleri, M	Intracortical excitability in patients with relapsing-remitting and secondary progressive multiple sclerosis	We designed this study to investigate possible correlations between variables measuring primary motor cortex excitability detected by single and paired-pulse transcranial magnetic stimulation (TMS) and the severity of clinical manifestations in patients with multiple sclerosis (MS). Thirty patients with MS in remission, 16 with relapsing-remitting (RR), 14 with secondary progressive disease (SP) …	Y	Outpatient? Qualify based on that?	U	Demographics for controls not provided.	N	Demographics for controls not provided.	JOURNAL OF NEUROLOGY	2009	256	6	933	938		10.1007/s00415-009-5047-0
236	Conte, A; Li Voti, P; Pontecorvo, S; Quartuccio, ME; Baione, V; Rocchi, L; Cortese, A; Bologna, M; Francia, A; Berardelli, A	Attention-related changes in short-term cortical plasticity help to explain fatigue in multiple sclerosis	Background: In multiple sclerosis (MS), pathophysiology of fatigue is only partially known. Objective: The aim of this study was to investigate whether the attention-induced modulation on short- and long-term cortical plasticity mechanisms in primary motor area (M1) is abnormal in patients with MS-related fatigue. Methods: All participants underwent 5-Hz repetitive transcranial magnetic stimulati…	Y	T0	Y		Y		MULTIPLE SCLEROSIS JOURNAL	2016	22	10	1359	1366		10.1177/1352458515619780
237	Coquillat, PB	Use of magnetic fields in medicine		Y	T0	N	Irrelevant Review	N		REVISTA CLINICA ESPANOLA			MADRID	PRINCIPE DE VERGARA, 112, 1 F, G-28002 MADRID, SPAIN	0014-2565	FEB	1996
238	Cordoba, J; Raguer, N; Flavia, M; Vargas, V; Jacas, C; Alonso, J; Rovira, A	T2 hyperintensity along the cortico-spinal tract in cirrhosis relates to functional abnormalities	Magnetic resonance has shown T2 hyperintensity along the cortico-spinal tract in the brain of cirrhotic patients. This abnormality, which is reversible after liver transplantation, appears to correspond to mild edema. Because astrocytic edema present in hepatic encephalopathy may be responsible for neuronal dysfunction, we studied whether T2 hyperintensity along the cortico-spinal tract may relat…	N	Not enough info	N	Cirrhosis	N		HEPATOLOGY	2003	38	4	1026	1033		10.1053/jhep.2003.50406
239	Correale, J; Farez, M; Razzitte, G	Helminth infections associated with multiple sclerosis induce regulatory B cells	Objective: To assess the importance of B-cell control during parasite infections In multiple sclerosis (MS) patients. Methods: Peripheral blood CD19+ B cells from 12 helminth-infected MS patients, 12 MS patients without infection, 10 patients infected with Trypanosoma cruzi, 8 subjects infected with Paracoccidioides brasiliensis, and 12 healthy control Subjects were purified using magnetic cell s…	Y		N	No TMS	N		ANNALS OF NEUROLOGY	2008	64	2	187	199		10.1002/ana.21438
240	Cosmulescu M., Bolbocean O., Mazilu G., Borzecki K., Popescu C.D.	The use of transcranial magnetic stimulation and thermography in the examination of patients with multiple sclerosis	The majority of patients with Multiple Sclerosis have motor dysfunction from the early onset of the disease. Both acute presentations and subsequent relapses of the disease contribute to the worsening of the motor deficits that can develop into quadriplegia. Quantification of the deficits is performed using EDSS scale (1, 7) which can quantify the gait deficits among other parameters. Aim. The pr…	N	Presentation	N	No TMS	N		New Medicine (2011) 2011-January:2 (52-56). Date of Publication: 2011
241	Cosmulescu M., Borzecki K., Preda R., Alexa D., Mazilu G., Popescu C.D.	New parameter in multiple sclerosis analysis	Changes in motor evoked potentials in patients with multiple sclerosis (MS) during the process of magnetic stimulation were analysed. Several specific muscle responses were studied and a new multiplication factor (MF) was defined as the ratio between average latency times or central motor conduction times (CMCTs) and average times with a reference in healthy group and corresponds to each grade of…	N	Not enough info	N	Irrelevant Review	N	Irrelevant Review	New Medicine (2011) 2011-January:2 (57-60). Date of Publication: 2011
242	Costa, J; Gomes, C; de Carvalho, M	Diagnosis, Pathogenesis and Therapeutic Targets in Amyotrophic Lateral Sclerosis	Amyotrophic Lateral Sclerosis (ALS) is a fatal neurodegenerative disease of the motor system. The diagnosis is clinical, but additional investigations such as electromyography, transcranial magnetic stimulation and neuroimaging have demonstrated their usefulness in supporting diagnosis. Exhaustive research for the identification of molecular markers in the cerebrospinal fluid and plasma of ALS pa…	Missing		N	ALS	N		CNS & NEUROLOGICAL DISORDERS-DRUG TARGETS	2010	9	6	764	778
245	Cragg, JJ; Warner, FM; Finnerup, NB; Jensen, MP; Mercier, C; Richards, JS; Wrigley, P; Soler, D; Kramer, JLK	Meta-analysis of placebo responses in central neuropathic pain: impact of subject, study, and pain characteristics	The placebo response is a complex construct related to psychobiological effects, as well as natural history and regression to the mean. Moreover, patient and study design characteristics have also been proposed as significantly affecting placebo responses. The aim of the current investigation was to identify factors that contribute to variable placebo responses in clinical trials involving indivi…	Missing		N	Irrelevant Review	N		PAIN	2016	157	3	530	540		10.1097/j.pain.0000000000000431
246	Cramer S.C., Cassidy J.M.	Application of fMRI to monitor motor rehabilitation	Motor deficits contribute to disability in a number of neurological conditions. A wide range of emerging restorative therapies have the potential to reduce this by favorably modifying function. In many medical contexts, a study of target organ function improves efficacy of a therapeutic intervention. However, the optimal methods to prescribe a restorative therapy in the setting of central nervous…	N	Conference	N	No TMS	N		Neuromethods (2016) 119 (833-849). Date of Publication: 1 Sep 2016							10.1007/978-1-4939-5611-1_27
247	Créange A., Lefaucheur J.-P., Balleyguier M.-O., Galactéros F.	Iron depletion induced by bloodletting and followed by rhEPO administration as a therapeutic strategy in progressive multiple sclerosis: A pilot, open-label study with neurophysiological measurements	Objectives: To evaluate the concept that iron depletion (ID) induced by bloodletting and followed by recombinant human erythropoietin (rhEPO) administration could be a therapeutic strategy in progressive multiple sclerosis (PMS) and that it could be assessed by neurophysiological measurements. Patients and methods: In four patients with PMS, bloodletting was performed until ID was induced, and th…	N	No clinical data (EDSS)	N	No TMS	N		Neurophysiologie Clinique (2013) 43:5-6 (303-312). Date of Publication: December 2013							10.1016/j.neucli.2013.09.004
251	Cruz-Martínez A., González-Orodea J.I., López PajaresR., Arpa J.	Disability in multiple sclerosis. The role of transcranial magnetic stimulation	Transcranial magnetic stimulation (TMS) was used to measure intensity threshold, conduction of the central motor pathways (CMCT) and amplitude of the motor evoked potentials (MEPs) in 50 patients with definite form of multiple sclerosis (MS), 31 females and 19 males, aged 15 to 58 years (mean 31, 9 ± 9.8). Abnormalities in at least one parameter after TMS have been found in 76% of the cases. Inte…	N	Presentation	N	No healthy control group	N		Electromyography and Clinical Neurophysiology (2000) 40:7 (441-447). Date of Publication: 2000
252	Cucurachi L., Immovilli P., Granella F., Pavesi G., Cattaneo L.	Short-latency afferent inhibition predicts verbal memory performance in patients with multiple sclerosis	Background : The pathogenesis of cognitive deficits in multiple sclerosis (MS) patients is the subject of debate. A causative role of grey matter impairment has been suggested. Acetylcholinesterase inhibitors have been proposed in the treatment of cognitive impairment in MS. Short-latency afferent inhibition (SAI) is a cortical phenomenon assessed by a transcranial magnetic stimulation protocol t…	Y		U	Demographics for controls not provided.	Y		Journal of Neurology (2008) 255:12 (1949-1956). Date of Publication: December 2008							10.1007/s00415-008-0041-5
255	Cui, JL; Li, GS; Mak, KC; Luk, KDK; Hu, Y	A combination of functional magnetic resonance imaging and diffusion tensor image to explore structure-function relationship in healthy and myelopathic spinal cord	Background: Cervical spondylotic myelopathy (CSM) is a degenerative disorder that can chronically damage the spinal cord. The aim of this study was to investigate the column-specific degeneration in the cervical cord with CSM and explore the structure-function relationship by diffusion tensor imaging (DTI) and functional magnetic resonance imaging (fMRI). Patients and methods: DTI and blood-oxyge…	N	Presentation	N	Cervical spondylotic myelopathy	N	healthy volunteers served as the control group.	JOURNAL OF NEURORESTORATOLOGY	2016	4		69	78		10.2147/JN.S116450
256	Cummings J.L.	Progress in neurotherapeutics and neuropsychopharmacology 2008	There has been continuous progress in neurotherapeutics and neuropsychopharmacology in the past year. Notable are the reports of successful preliminary disease-modifying trials in Niemann-Pick disease and Friedreich's ataxia. Progress also has been made in treatment of migraine, stroke, epilepsy, multiple sclerosis, traumatic brain injury, and pain. Biomarkers are increasingly used to establish p…	N	Leg	N	Irrelevant Review	N		Progress in Neurotherapeutics and Neuropsychopharmacology (2008) 3:1 (1-11). Date of Publication: March 2008							10.1017/S1748232107000183
257	Cunningham, DA; Janini, D; Wyant, A; Bonnett, C; Varnerin, N; Sankarasubramanian, V; Potter-Baker, KA; Roelle, S; Wang, XF; Siemionow, V; Yue, GH; Plow, EB	POST-EXERCISE DEPRESSION FOLLOWING SUBMAXIMAL AND MAXIMAL ISOMETRIC VOLUNTARY CONTRACTION	It is well known that corticomotor excitability is altered during the post-exercise depression following fatigue within the primary motor cortex (M1). However, it is currently unknown whether corticomotor reorganization following muscle fatigue differs between magnitudes of force and whether corticomotor reorganization occurs measured with transcranial magnetic stimulation (TMS). Fifteen young he…	N	Abstract	N	Healthy controls only	N		NEUROSCIENCE	2016	326		95	104		10.1016/j.neuroscience.2016.03.060
258	Curra, A; Modugno, N; Inghilleri, M; Manfredi, M; Hallett, M; Berardelli, A	Transcranial magnetic stimulation techniques in clinical investigation	Transcranial magnetic stimulation (TMS) is a technique that can activate cortical motor areas and the corticospinal tract without causing the subject discomfort. Since TMS was introduced, numerous applications of the technique have been developed for the evaluation of neurologic diseases. Standard TMS applications (central motor conduction time, threshold and amplitude of motor evoked potentials)…	N	No clinical data (EDSS)	R		R		NEUROLOGY	2002	59	12	1851	1859
259	Curt, A; Weinhardt, C; Dietz, V	Significance of sympathetic skin response in the assessment of autonomic failure in patients with spinal cord injury	As a result of spinal cord injury (SCI) descending spinal sympathetic pathways can be severed. Because of its clinical significance, the aim of this study was to assess the disturbance of the spinal sympathetic pathway by clinical and electrophysiological examinations. The sympathetic skin response (SSR) due to electrical stimulation of median nerve and transcranial magnetic stimulation was exami…	N	No MEP data	N	Spinal cord injury	N		JOURNAL OF THE AUTONOMIC NERVOUS SYSTEM			AMSTERDAM	PO BOX 211, 1000 AE AMSTERDAM, NETHERLANDS	0165-1838	NOV 6	1996
260	Cuypers K., Leenus D.J.F., Van Den Berg F.E., Levin O., Thijs H., Swinnen S.P., Meesen R.L.J.	Long-term TENS treatment decreases cortical motor representation in multiple sclerosis	This study investigated the effects of a long-term transcutaneous electrical nerve stimulation (TENS) treatment on cortical motor representation in patients with multiple sclerosis (MS). In this double-blind crossover design, patients received either TENS or sham stimulation for 3. weeks (1. h per day) on the median nerve region of the most impaired hand, followed by the other stimulation conditi…	Y		N	No healthy control group	N		Neuroscience (2013) 250 (1-7). Date of Publication: 10 Oct 2013							10.1016/j.neuroscience.2013.06.046
263	Cuypers K., Leenus D.J.F., Van Wijmeersch B., Thijs H., Levin O., Swinnen S.P., Meesen R.L.J.	Anodal tDCS increases corticospinal output and projection strength in multiple sclerosis	The application of anodal transcranial direct current stimulation (atDCS) to the human brain has been shown to elicit corticospinal (CS) excitability changes. This study evaluated the effect of a single session of atDCS on CS excitability in patients with multiple sclerosis (MS). atDCS and sham tDCS (stDCS) were applied to the primary motor cortex (M1) contralateral to the more severely impaired …	N	Poster abstract	N	No healthy control group	N		Neuroscience Letters (2013) 554 (151-155). Date of Publication: 25 Oct 2013							10.1016/j.neulet.2013.09.004
266	Dachy, B; Dan, B	Electrophysiological assessment of the effect of intrathecal baclofen in spastic children	Objectives: To evaluate the effect of intrathecal baclofen in a group of spastic children using electrophysiological procedures described in adults. Methods: Six children (aged 1-14 years) with severe spasticity of various aetiologies underwent transcranial magnetic stimulation, H reflex and flexor reflex studies before and after intrathecal injection of baclofen. Ashworth scale was used for clin…	U	Frequency of MEP?	N	Pediatric spasticity	N		CLINICAL NEUROPHYSIOLOGY	2002	113	3	336	340	PII S1388-2457(02)00010-X	10.1016/S1388-2457(02)00010-X
269	Dan, B; Christiaens, F; Christophe, C; Dachy, B	Transcranial magnetic stimulation and other evoked potentials in pediatric multiple sclerosis	In children, multiple sclerosis is rare and has some clinical and paraclinical differences compared with adults, The assessment of corticospinal motor tracts is expected to be relevant because of their frequent earl involvement in this disease. Reported are the results of transcranial magnetic stimulation in two children who presented at 12 and 9 years of age with clinically probable and definite…	Y		N	Pediatric MS	N		PEDIATRIC NEUROLOGY			NEW YORK	655 AVENUE OF THE AMERICAS, NEW YORK, NY 10010 USA	0887-8994	FEB	2000
270	DANNUNZIO, G; MOGLIA, A; ZANDRINI, C; BOLLANI, E; VITALI, L; PESSINO, P; SCARAMUZZA, A; LANZI, G; LORINI, R	CENTRAL MOTOR CONDUCTION TIME IN CHILDREN AND ADOLESCENTS WITH INSULIN-DEPENDENT DIABETES-MELLITUS (IDDM)	Measurement of central motor conduction time (CMCT) after percutaneous magnetic stimulation of the brain is an electrophysiological method that may discover subclinical impairment of central nervous system (CNS). In order to detect an impairment of CNS, we measured CMCT right (R) and left (L) after percutaneous stimulation of the brain in 34 patients affected by insulin-dependent diabetes mellitu…	R	Review	N	Diabetes mellitus	N		DIABETES RESEARCH AND CLINICAL PRACTICE		Scaramuzza, Andrea/J-6865-2012	CLARE	ELSEVIER HOUSE, BROOKVALE PLAZA, EAST PARK SHANNON, CO, CLARE, 00000, IRELAND	0168-8227	APR	1995
271	Dattola, V; Rosso, M; Morgante, E; Rizzo, V; Crupi, D; Quartarone, A	MRI and TMS combined to study central fatigue in multiple sclerosis		N	Presentation	N	Conference	N	Conference	MULTIPLE SCLEROSIS	2007	13		S125	S125
272	DAVEY, KR; CHENG, CH; EPSTEIN, CM	PREDICTION OF MAGNETICALLY INDUCED ELECTRIC-FIELDS IN BIOLOGICAL TISSUE	There are many potential medical applications in which it is desirable to noninvasively induce electric fields. One such application that serves as the backdrop of this work is that of stimulating neurons in the brain. The magnetic fields necessary must be quite high in magnitude, and fluctuate rapidly in time to induce the internal electric fields necessary for stimulation. Attention is focused …	N	poster session	N	Modelling study	N		IEEE TRANSACTIONS ON BIOMEDICAL ENGINEERING			NEW YORK	345 E 47TH ST, NEW YORK, NY 10017-2394	0018-9294	MAY	1991
274	Davis M.P., Walsh D.	Mechanisms of fatigue	Fatigue is a common experience of individuals suffering from chronic illnesses. Mechanisms responsible for fatigue may be central or peripheral. Central fatigue may result from proximal events and include the neuromuscular junction and are subdivided into spinal and supraspinal. Peripheral fatigue arises from the muscle and predominately involves muscle bioenergetics or excitation contraction. Fa…	N	abstract	N		N		Journal of Supportive Oncology (2010) 8:4 (164-174). Date of Publication: July-August 2010
275	Dawes, H; Collett, J; Meaney, A; Duda, J; Sackley, C; Wade, D; Barker, K; Izadi, H	Delayed Recovery of Leg Fatigue Symptoms Following a Maximal Exercise Session in People With Multiple Sclerosis	Background. Fatigue is a chronic symptom for people with multiple sclerosis (PwMS). Objective. Symptoms of fatigue were investigated during and following a single exercise session. Methods. In all, 58 PwMS and 15 healthy, low-active controls performed a cycle ergometer incremental exercise test to voluntary exhaustion. Physiological intensity (expired air and heart rate), perceived breathlessness…	U	Not there	N	No TMS	N		NEUROREHABILITATION AND NEURAL REPAIR	2014	28	2	139	148		10.1177/1545968313503218
276	de Carvalho, M; Chio, A; Dengler, R; Hecht, M; Weber, M; Swash, M	Neurophysiological measures in amyotrophic lateral sclerosis: Markers of progression in clinical trials	In this review we evaluate clinical neurophysiological methods, originally described for use in diagnosis that can be applied to measurement of change during the progress of amyotrophic lateral sclerosis (ALS). Such measurements are potentially important in clinical trials, and also in clinical practice. We have assessed methods for lower and upper motor neuron function, including conventional EM…	U	not there	N	ALS	N		AMYOTROPHIC LATERAL SCLEROSIS AND OTHER MOTOR NEURON DISORDERS	2005	6	1	17	28		10.1080/14660820410020600
277	De Gennaro, L; Ferrara, M; Bertini, M; Pauri, F; Cristiani, R; Curcio, G; Romei, V; Fratello, F; Rossini, PM	Reproducibility of callosal effects of transcranial magnetic stimulation (TMS) with interhemispheric paired pulses	Transcranial magnetic stimulation (TMS) of the motor cortex of one hemisphere (conditioning stimulus (CS)) inhibits EMG responses evoked in distal hand muscles by a later magnetic stimulus given at an appropriate interval, over the opposite hemisphere (test stimulus (TS)). This effect is commonly attributed to an inhibition produced at cortical level via a transcallosal route. The present study a…	N	not defined group of MS	N	Healthy controls only	N		NEUROSCIENCE RESEARCH	2003	46	2	219	227		10.1016/S0168-0102(03)00060-9
278	de Noordhout, AM	Cortical magnetic stimulation	In the last decade, a new electrophysiological tool has become available since the development of painless magnetic stimulators able to activate the primary motor cortex and the motor roots in conscious man. Therefore, it became possible to measure the conduction time within fast-conducting central motor pathways by substracting from the total latency of muscle responses elicited by cortical stim…	N	clinical data? No EDSS	N		N		NEUROPHYSIOLOGIE CLINIQUE-CLINICAL NEUROPHYSIOLOGY			PARIS CEDEX 15	23 RUE LINOIS, 75724 PARIS CEDEX 15, FRANCE	0987-7053	FEB	1998
279	De Noorthout A.M., Charlier M., Delwaide P.J.	Magnetic stimulation of the motor cortex in early multiple sclerosis		U	not there	N	Conference	N		Recent advances in Multiple Sclerosis therapy: proceedings of the Vth Congress of the European Committee for treatment and research in Multiple Sclerosis (ECTRIMS). ICS863 (1989) (53-59). Date of Publication: 1989
280	DECASTRO, P; ARTIEDA, J; FLORENTIN, S; LAGE, JMM	MAGNETIC STIMULATION OF MOTOR PATHWAY IN MULTIPLE-SCLEROSIS PATIENTS - A COMPARISON WITH MULTIMODAL EVOKED-POTENTIALS		U		U	Unable to find online	N	Cannot obtain article	RECENT ADVANCES IN MULTIPLE SCLEROSIS THERAPY		Artieda, Julio/L-4704-2014	AMSTERDAM	AMSTERDAM			1989
281	Deftereos, SN; Panagopoulos, GN; Georgonikou, D; Katsarou, S; Doumas, L; Karageorgiou, E; Karageorgiou, CE	Repetitive transcranial magnetic stimulation can improve walking in multiple sclerosis patients with spastic paraparesis		U		U	Unable to find online	N	Cannot obtain article	NEUROLOGY	2008	70	11	A90	A90
282	Degirmenci, E; Erdogan, C; Bir, LS	Correlation between blink reflex abnormalities and magnetic resonance imaging findings in patients with multiple sclerosis	This study investigates the correlation between brain magnetic resonance imaging findings and blink reflex abnormalities in patients with relapsing remitting multiple sclerosis. Twenty-six patients and 17 healthy subjects were included in this study. Blink reflex test (BRT) results were obtained using right and left stimulations; thus, 52 BRT results were recorded for the patient group, and 34 BR…	Y		N	No TMS	N		ACTA NEUROLOGICA BELGICA	2013	113	3	265	269		10.1007/s13760-012-0175-1
283	Deistung, A; Schafer, A; Schweser, F; Biedermann, U; Turner, R; Reichenbach, JR	Toward in vivo histology: A comparison of quantitative susceptibility mapping (QSM) with magnitude-, phase-, and R-2*-imaging at ultra-high magnetic field strength	Quantitative magnetic susceptibility mapping (QSM) has recently been introduced to provide a novel quantitative and local MRI contrast. However, the anatomical contrast represented by in vivo susceptibility maps has not yet been compared systematically and comprehensively with gradient (recalled) echo (GRE) magnitude, frequency, and R-2* images. Therefore, this study compares high-resolution quan…	N	clinically isolated syndrome	N	No TMS	N		NEUROIMAGE	2013	65		299	314		10.1016/j.neuroimage.2012.09.055
284	Del Pilar Rodriguez Rodriguez M., Valdes C.A.T.	The ulitity of cortical silent period to differenciate different pathologies of the pyramidal and extrapiramydal systems	Objective: To evaluate the utility of the cortical silence period (CSP), a noninvasive neurophysiological tool in subjects with different neurological pathologies: multiple sclerosis (ME), paresis secondary to chronic stroke, movement disorders such as Parkinson's disease (PD) and Writer's cramp (WC) as a way of evaluation with. Background: The cortical silent period (CSP) is the time that elapse…	N	Conference	N	Conference	N	Conference	Movement Disorders (2017) 32 Supplement 1. Date of Publication: 1 Feb 2017							10.1002/mds.26972
285	Dell'Acqua, ML; Landi, D; Zito, G; Zappasodi, F; Lupoi, D; Rossini, PM; Filippi, MM; Tecchio, F	Thalamocortical Sensorimotor Circuit in Multiple Sclerosis: An Integrated Structural and Electrophysiological Assessment	Demyelination and axonal damage are pathologic hallmarks of multiple sclerosis (MS), leading to loss of neuronal synchronization, functional disconnection amongst brain relays, and clinical sequelae. To investigate these properties, the primary component of the sensorimotor network was analyzed in mildly disabled Relapsing-Remitting MS patients without sensory symptoms at the time of the investig…	N	poster session	N	No TMS	N		HUMAN BRAIN MAPPING	2010	31	10	1588	1600		10.1002/hbm.20961
286	Delov, RA; Rozhdestvensky, AS; Marks, EA; Smyalovsky, VE; Khanokh, EV; Kakulya, AV; Sokolova, EA; Agapova, OY	Clinical and electrophysiological and molecular genetic characteristics of the course of relapsing-remitting multiple sclerosis	In order to study specific features of remitting multiple sclerosis patients with different genotypes of polymorphic loci rs1800629 gene TNF alpha, rs6074022 gene CD40, rs10492972 gene KIF1B, rs187238 IL-18 gene, conducted clinical and electrophysiological examination of 149 patients with relapsing-remitting multiple sclerosis. Found that the most common symptoms of rapidly progressive relapsing-…	N	clinical data? No EDSS	N	No TMS	N		ZHURNAL NEVROLOGII I PSIKHIATRII IMENI S S KORSAKOVA	2013	113	10	55	59
288	DENOORDHOUT, AM; REMACLE, JM; PEPIN, JL; BORN, JD; DELWAIDE, PJ	MAGNETIC STIMULATION OF THE MOTOR CORTEX IN CERVICAL SPONDYLOSIS		N	oral presentation	N	Cervical spondylotis	N		NEUROLOGY		PEPIN, Jean-Louis/M-6549-2014	BOSTON	34 BEACON STREET, BOSTON, MA 02108-1493	0028-3878	JAN	1991
289	Desiato M.T., Caramia M.D.	Towards a neurophysiological marker of amyotrophic lateral sclerosis as revealed by changes in cortical excitability	Motor evoked potentials (MEPs) to magnetic trans cranial stimulation (TCS) were recorded in 47 patients with amyotrophic lateral sclerosis (ALS) in order to evaluate both excitability and conductivity changes relating to central motor pathways. The results were compared with those obtained from a control population of 43 subjects, 34 patients with definite multiple sclerosis (MS) and 15 patients …	N	No clinical data (EDSS)	N	ALS	N	ALS	Electroencephalography and Clinical Neurophysiology - Electromyography and Motor Control (1997) 105:1 (1-7). Date of Publication: February 1997							10.1016/S0924-980X(96)96582-0
291	Desiato, MT; Bernardi, G; Hagi, A; Boffa, L; Caramia, MD	Transcranial magnetic stimulation of motor pathways directed to muscles supplied by cranial nerves in amyotrophic lateral sclerosis	Objectives: In amyotrophic lateral sclerosis (ALS). transcranial magnetic stimulation (TMS) detects remarkable abnormalities of central motor circuits: cortical excitability threshold, silent period (SP) duration and infra-cortical inhibition. TMS directed to cranio-facial musculature was performed in ALS patients in order: (1) to document the neurophysiological involvement of motor central and p…	N	No controls	N	ALS	N		CLINICAL NEUROPHYSIOLOGY	2002	113	1	132	140		10.1016/S1388-2457(01)00724-6
295	Di Lazzaro, V; Oliviero, A; Profice, P; Ferrara, L; Saturno, E; Pilato, F; Tonali, P	The diagnostic value of motor evoked potentials	Objective: To assess the diagnostic usefulness of motor evoked potentials (MEPs) and to identify the optimal method for calculating the central conduction time. The test results were evaluated in a prospective study of 1023 neurological patients. Methods: We evaluated the correlation between clinical and electrophysiological findings, the accuracy, the sensitivity, the percentage of subclinical a…	N	"Established diagnosis"?	N	No healthy control group	N		CLINICAL NEUROPHYSIOLOGY			CLARE	CUSTOMER RELATIONS MANAGER, BAY 15, SHANNON INDUSTRIAL ESTATE CO, CLARE, IRELAND	1388-2457	JUL	1999
296	Di Sapio A., Bertolotto A., Melillo F., Berchialla P., Malucchi S., Capobianco M., Lo Re M., Troni W.	Motor evoked potentials from multiple recording sites of the lower limbs as a monitoring tool of central motor function in MS relapsing patients	Background: Variability of Motor Evoked Potential (MEP) area hinders quantification of central motor conduction failure (CMCF), i.e. conduction block and axonal damage, in follow-up studies. MEP averaging, combined with objective control of voluntary facilitation, restrains intra-trial MEP variability (Di Sapio et al, 2013). Objectives: 1. To develop a procedure to achieve maximum stability of ME…	U	No means for UL-MEP	Y		N	LOWER LIMB	Multiple Sclerosis (2014) 20:1 SUPPL. 1 (376-377). Date of Publication: September 2014							10.1177/1352458514547846
297	Di Sapio A., Bertolotto A., Melillo F., Malucchi S., Berchialla P., Sperli F., Troni W.	Short term follow up of central motor conduction failure in relapsing multiple sclerosis patients undergoing high dose steroids treatment	Question: To measure acute changes of central motor conduction failure (CMCF) in Multiple Sclerosis (MS) patients after a full course of high dose steroids therapy. Objective: Random variability of MEP area limits CMCF quantification in follow-up studies. We have recently developed a method, described in the companion paper [1] to restrain inter-trial MEP variability, mainly based on the combined…	Y		N	No healthy control group	N		Clinical Neurophysiology (2014) 125 SUPPL. 1 (S205-S206). Date of Publication: June 2014
300	Di Sapio A., Melillo F., Malucchi S., Bertolotto A., Troni V.	A methodological reappraisal to restrain intra-trial MEP area variability	OBJECTIVE: To develop a method to lower intra-trial area variability in MEPs recorded simultaneously from several proximal and distal muscles of lower limbs. BACKGROUND: Motor Evoked Potential (MEP) area could reflect motor conduction failure/axonal damage, but its reliability is affected by MEPs' variability. DESIGN/METHODS: In 7 healthy volunteers and 4 multiple sclerosis patients MEPs to Trans…	N	Presentation	N	Conference	N	Conference	Neurology (2013) 80:1 MeetingAbstracts. Date of Publication: 12 Feb 2013
301	Di Sapio A., Pulizzi A., Sperli F., Bertolotto A., Troni W.	Peripheral and central (CCT) conduction times to proximal and distal muscles of lower limbs: Methodological aspects and clinical application in MS patients	Introduction: MEPs are useful to detect and monitor central motor damage (CMD) in MS patients. However, a method able to provide a simultaneous evaluation of CMD damage to several proximal and distal muscles of both lower limbs is still lacking. Moreover, magnetic LSR stimulation provides submaximal CMAPs with a biased latency due to the distal activation site, usually occurring at the vertebral …	U	not there	N	No healthy control group	N		Clinical Neurophysiology (2011) 122 SUPPL. 1 (S138). Date of Publication: June 2011							10.1016/S1388-2457(11)60493-8
302	Di Sapio A., Sperli F., Malucchi S., Merola A., Berra E., Bertolotto A., Troni W.	Peripheral and central conduction time to proximal and distal muscle districts of lower limbs: Methodological aspects and clinical application in Multiple Sclerosis patients	Objective: To develop a procedure to calculate Central (CCT) and Peripheral (PCT) Conduction Times along motor pathway to proximal and distal muscle districts of lower limbs (vastus medialis-VM, peroneal group-PE, plantar flexors of the foot-PFF) by simultaneously recording from both sides M responses evoked by Transcranial Magnetic Stimulation (TMS) and High Voltage Electrical Stimulation (HVES)…	N	Presentation	N	Conference	N	Conference	Multiple Sclerosis (2010) 16:10 SUPPL. 1 (S117). Date of Publication: October 2010							10.1177/1352458510383204
303	Di Sapio A., Sperli F., Pulizzi A., Malucchi S., Bertolotto A., Troni W.	Mapping central motor conduction damage to lower limbs: Clinical correlation and application in monitoring multiple sclerosis patients	Objective: To obtain a reliable method to monitor Central Motor Damage (CMD) of lower limbs in Multiple Sclerosis (MS) patients. Introduction: The purpose of our method was to quantify the CMD of lower limbs of MS patients by recording simultaneously Motor Evoked Potentials (MEPs) and CMAPs from several proximal and distal muscle districts of lower limbs, by combining Transcranial Magnetic Stimul…	N	Presentation	N	Conference	N	Conference	Multiple Sclerosis (2011) 17:10 SUPPL. 1 (S171-S172). Date of Publication: October 2011							10.1177/1352458511422300
304	Di Sapio, A; Bertolotto, A; Melillo, F; Sperli, F; Malucchi, S; Troni, W	A new neurophysiological approach to assess central motor conduction damage to proximal and distal muscles of lower limbs	Objective: To develop a neurophysiological method to explore central motor pathways to proximal and distal muscles of lower limbs. Methods: MEPs to transcranial magnetic stimulation using the double cone coil were bilaterally and simultaneously recorded from vastus medialis, tibialis anterior and flexor hallucis brevis. Voluntary facilitation was controlled using a predefined sequence of movement…	N	Leg	N	Lower limb	N	Lower limb	CLINICAL NEUROPHYSIOLOGY	2014	125	1	133	141		10.1016/j.clinph.2013.06.018
306	Dias Ferreira J.C., Conforto A.B., Marie S.K.N., Cohen L.G., Scaff M.	Transcranial magnetic stimulation [1] (multiple letters)		U	not there	N	Commentary	N		Arquivos de Neuro-Psiquiatria (2004) 62:1 (185). Date of Publication: March 2004
307	DICK, J	MAGNETIC STIMULATION OF THE NERVOUS-SYSTEM	Magnetic brain stimulation is a painless method of exciting cortical neurons and provides a measure of corticospinal tract function. Its clinical role is currently limited though advances in coil design may lead to wider clinical applications and to greater understanding of how the cerebral cortex functions in vivo.	N	poster session	N		N		BRITISH JOURNAL OF HOSPITAL MEDICINE			LONDON	CROXTED MEWS, 286A-288 CROXTED ROAD, LONDON, ENGLAND SE24 9BY	0007-1064	NOV 4	1992
308	Dieguez Varela C., Ribeiro S.J., Lion Vazquez S., Midaglia L., Pereira-Martinez M.N., Fraga Bau A., Rodriguez Sanchez L., Rodriguez Acevedo B., Fontanillo Fontanillo M.M.	Intermittent theta-burst transcranial magnetic stimulation for spasticity in relapsing-remitting multiple sclerosis	Question: The aim of the study was to re-evaluate the effect of highfrequency repetitive transcranial magnetic stimulation-intermittent theta burst (rTMS-iTB) on leg spasticity in relapsing remitting multiple sclerosis (RRMS) patients. Methods: 12 patients (34-65 years; mean age: 51.9±10.9) in the remitting phase of the disease were selected for the trial. Patients were randomly allocated to sham…	N	No MEP data	N	No healthy control group	N		Clinical Neurophysiology (2014) 125 SUPPL. 1 (S203). Date of Publication: June 2014
309	Diem, R; Demmer, I; Boretius, S; Merkler, D; Schmelting, B; Williams, SK; Sattler, MB; Bahr, M; Michaelis, T; Frahm, J; Bruck, W; Fuchs, E	Autoimmune optic neuritis in the common marmoset monkey: Comparison of visual evoked potentials with MRI and histopathology	PURPOSE. To assess the use of visual evoked potentials (VEPs) for the in vivo detection of impaired visual function in a marmoset model of multiple sclerosis. The sensitivity of the VEP recordings was determined by comparison with magnetic resonance imaging (MRI) and histopathology. METHODS. Baseline VEPs were recorded in six healthy marmoset monkeys in response to light-flash stimulation. Experi…	N	not there	N	No TMS	N		INVESTIGATIVE OPHTHALMOLOGY & VISUAL SCIENCE	2008	49	8	3707	3714		10.1167/iovs.08-1896
310	Dietz, V; Sinkjaer, T	Spastic movement disorder: impaired reflex function and altered muscle mechanics	in clinical practice, signs of exaggerated tendon tap reflexes associated with muscle hypertonia are generally thought to be responsible for spastic movement disorders. Most antispastic treatments are, therefore, directed at the reduction of reflex activity. In recent years, however, researchers have noticed a discrepancy between spasticity as measured in the clinic and functional spastic movemen…	N	conference	N	Irrelevant Review	N		LANCET NEUROLOGY	2007	6	8	725	733		10.1016/S1474-4422(07)70193-X
311	DIMITRIJEVIC, MR; HSU, CY; MCKAY, WB	NEUROPHYSIOLOGICAL ASSESSMENT OF SPINAL-CORD AND HEAD-INJURY	Selected neurophysiologic studies can supplement clinical examination in assessing residual motor function after spinal cord or head injury. The ability of polyelectromyographic recording to detect subclinical suprasegmental control is illustrated in paraplegic patients after spinal cord injury. Excitatory or inhibitory modulation of segmental motor activity in a subpopulation of patients with cl…	N	Not MEP UL	N	Irrelevant Review	N		JOURNAL OF NEUROTRAUMA			LARCHMONT	2 MADISON AVENUE, LARCHMONT, NY 10538	0897-7151	MAR	1992
312	DIMITRIJEVIC, MR; KOFLER, M; MCKAY, WB; SHERWOOD, AM; VANDERLINDEN, C; LISSENS, MA	EARLY AND LATE LOWER-LIMB MOTOR EVOKED-POTENTIALS ELICITED BY TRANSCRANIAL MAGNETIC MOTOR CORTEX STIMULATION	Transcranial magnetic motor cortex stimulation can elicit a series of responses recorded with different latencies from relaxed muscles of the lower limbs. In 7 healthy subjects, ranging in age from 16 to 62 years, stimulation was delivered by a 9 cm coil centered over Cz with the subject in the supine position. Surface polyelectromyography was used to record motor evoked potentials (MEPs) from th…	Y		N	Healthy controls only	N		ELECTROENCEPHALOGRAPHY AND CLINICAL NEUROPHYSIOLOGY			CLARE	ELSEVIER HOUSE, BROOKVALE PLAZA, EAST PARK SHANNON, CO, CLARE, 00000, IRELAND	0013-4694	DEC	1992
314	Dobkin B.H.	Neurobiology of rehabilitation	Rehabilitation aims to lessen the physical and cognitive impairments and disabilities of patients with stroke, multiple sclerosis, spinal cord or brain injury, and other neurologic diseases. Conventional approaches beyond compensatory adjustments to disability may be augmented by applying some of the myriad experimental results about mechanisms of intrinsic biological changes after injury and the…	N	No healthy control group	N		N		Annals of the New York Academy of Sciences (2004) 1038 (148-170). Date of Publication: December 2004							10.1196/annals.1315.024
317	Dobkin, BH	Motor rehabilitation after stroke, traumatic brain, and spinal cord injury: common denominators within recent clinical trials	Purpose of review Experimental studies and clinical trials that aim to improve motor function for use of the upper extremity and walking are traditionally separated by the category of neurological disease. This boundary may deter investigators from finding common denominators in the conceptual basis and deployment of rehabilitation interventions, especially across nonprogressive diseases in adult…	N	MS and other patients grouped (head injury, etc.)	N	Irrelevant Review	N		CURRENT OPINION IN NEUROLOGY	2009	22	6	563	569		10.1097/WCO.0b013e3283314b11
318	Dobkin, BH	Fatigue versus activity-dependent fatigability in patients with central or peripheral motor impairments	In the rehabilitation literature, fatigue is a common symptom of patients with any neurological impairment when defined as a subjective lack of physical and mental energy that interferes with usual activities. Some complaints may, however, arise from fatigability, an objective decline in strength as routine use of muscle groups proceeds. By this refined definition of fatigue, exercise or sustaine…	Y		N		N		NEUROREHABILITATION AND NEURAL REPAIR	2008	22	2	105	110		10.1177/1545968308315046
320	Donato F., Turri M., Zanette G., Tugnoli V., Deotto L., Teatini F., Romito S., Moretto G., Squintani G.	A study of cortical and spinal excitability in patients affected by multiple sclerosis and spasticity after oromucosal cannabinoid spray (THC/CBD)	The therapeutic efficacy of oromucosal cannabinoid spray (THC/ CBD) for the treatment of spasticity is well documented by clinical trials, and THC/CBD has been approved in Italy for the treatment of spasticity in multiple sclerosis (MS). Our study aims to assess the neurophysiological correlates of the THC/CBD effect on spasticity in MS. We enrolled 16 MS patients who underwent a neurological exa…	N	Abstract	N	Conference	N	Conference	Clinical Neurophysiology (2016) 127:4 (e147). Date of Publication: 1 Apr 2016							10.1016/j.clinph.2015.09.071
321	Donzé C.	Update on rehabilitation in multiple sclerosis	Given that mobility impairment is a hallmark of multiple sclerosis, people with this disease are likely to benefit from rehabilitation therapy throughout the course of their illness. The review provides an update on rehabilitation focused on balance and walking impairment. Classical rehabilitation focusing on muscle rehabilitation, neurotherapeutic facilitation is effective and recommended. Other…	N	criteria? No official diagnoses	N		N		Presse Medicale (2015). Date of Publication: 2015							10.1016/j.lpm.2014.10.019
323	Drljacic, D; Pajic, S; Nedeljkovic, A; Milanovic, SD; Ilic, TV	Complex modulation of fingertip forces during precision grasp and lift after theta burst stimulation over the dorsal premotor cortex	Background/Aim. Adaptive control and fingertip force synchronization of precise grasp stability during unimanual manipulation of small objects represents an illustrative example of highly fractionated movements that are foundation of fine motor control. It is assumed that this process is controlled by several motor areas of the frontal lobe, particularly applicable to the primary motor (M-1) and …	N	Short results - no clinical measures	N	Healthy controls only	N		VOJNOSANITETSKI PREGLED	2017	74	6	526	535		10.2298/VSP151120249D
324	Duckers, HJ; vanDokkum, RP; Verhaagen, J; daSilva, FHL; Gispen, WH	Functional and neurophysiological evidence of the efficacy of trophic pharmacotherapy using an adrenocorticotrophic hormone analog in experimental allergic encephalomyelitis, an animal model of multiple sclerosis	Chronic experimental allergic encephalomyelitis (CEAE) is a well-established animal model for the human syndrome, multiple sclerosis. CEAE has striking histological, electrophysiological and clinical analogies with multiple sclerosis and is a valuable animal model for the preclinical pharmacotherapeutical development of new putative therapeutic agents. In this paper, we describe a neurotrophic re…	N	No clinical data (EDSS); motor unit	N	Animal model	N		NEUROSCIENCE			OXFORD	THE BOULEVARD, LANGFORD LANE, KIDLINGTON, OXFORD, ENGLAND OX5 1GB	0306-4522	MAR	1996
325	Duran, I; Martinez-Caceres, EM; Brieva, L; Tintore, M; Montalban, X	Similar pro- and anti-inflammatory cytokine production in the different clinical forms of multiple sclerosis	Cytokines ploy on important role in the initiation and maintenance of the inflammatory reaction in multiple sclerosis, a chronic inflammatory demyelinating disease of the central nervous system. Magnetic resonance imaging evidence supports clinical divergence between forms of multiple sclerosis with relapses and the primary progressive form without relapses which shows fewer and smeller inflammat…	Y		N	No TMS	N		MULTIPLE SCLEROSIS	2001	7	3	151	156		10.1177/135245850100700303
327	Dvorak J., Janssen B., Grob D.	The neurologic workup in patients with cervical spine disorders	Care must be exercised in interpreting the clinical and radiologic findings when assessing patients with cervical spondylosis and involvement of neural structures for surgery. If the clinical picture cannot logically be explained by the radiologic findings, further investigation is indicated to exclude a coexistent disorder. Investigations may include electrophysiologic tests, transcranial magnet…	N	poster session	N	Irrelevant Review	N		Spine (1990) 15:10 (1017-1022). Date of Publication: 1990
328	Edwards, S; Zvartau, M; Clarke, H; Irving, W; Blumhardt, LD	Clinical relapses and disease activity on magnetic resonance imaging associated with viral upper respiratory tract infections in multiple sclerosis	Background-Although the risk of clinical attacks of multiple sclerosis seems to be significantly increased with viral upper respiratory tract infections (URTI), serological evidence for the reported association remains controversial. In addition, although MRI is six to 10 times more sensitive than clinical exacerbations in indexing disease activity, any possible association between URTI and MRI a…	U	Recruitment and diagnosis not fully detailed	N	No TMS	N		JOURNAL OF NEUROLOGY NEUROSURGERY AND PSYCHIATRY			LONDON	BRITISH MED ASSOC HOUSE, TAVISTOCK SQUARE, LONDON WC1H 9JR, ENGLAND	0022-3050	JUN	1998
329	Eisen A.A., Shtybel W.	AAEM minimonograph #35: Clinical experience with transcranial magnetic stimulation	We elicited motor evoked potentials (MEPs) using transcortical magnetic stimulation in 150 control subjects aged 14 to 85 years and 275 patients with a variety of diseases. There were no significant side effects. Cortex-to-target muscle latencies measured 20.2±1.6 ms (thenar), 14.2±1.7 ms (extensor digitorum communis), 9.4±1.7 ms (biceps), and 27.2±2.9 ms (tibialis anterior). Central motor delay …	N	No clinical data (EDSS)	N	No clinical measures	N	No EDSS	Muscle and Nerve (1990) 13:11 (995-1011). Date of Publication: 1990
331	Eisen, A; EntezariTaher, M; Stewart, H	Cortical projections to spinal motoneurons: Changes with aging and amyotrophic lateral sclerosis	Peristimulus time histograms (PSTHs) of discharging single motor units, recorded from the extensor digitorum communis (EDC) during randomly applied cortical magnetic stimulation, were obtained in 42 normal subjects aged 24 to 83 years and 42 patients with amyotrophic lateral sclerosis (ALS) aged 37 to 84 years. Normal subjects had an early period of increased firing probability occurring at about…	U	Recruitment and diagnosis not fully detailed	N	ALS	N		NEUROLOGY			PHILADELPHIA	530 WALNUT ST, PHILADELPHIA, PA 19106-3621 USA	0028-3878	MAY	1996
332	EISEN, A; SIEJKA, S; SCHULZER, M; CALNE, D	AGE-DEPENDENT DECLINE IN MOTOR EVOKED-POTENTIAL (MEP) AMPLITUDE - WITH A COMMENT ON CHANGES IN PARKINSONS-DISEASE	Peak-to-peak measurement of the maximum amplitude motor evoked potential (MAXMEP) elicited by 20 consecutive transcranial magnetic stimuli recorded from the contracting thenar and hypothenar muscles measured 9.8 +/- 2.0 mV and 7.25 +/- 2.9 mV respectively (P < 0.01). The ratio of MAXMEP/CMAP measured 92.6 +/- 25.8% and 54.8 +/- 12.3% respectively (P < 0.001). Repeat studies showed good individual…	U	Recruitment and diagnosis not fully detailed	N	Parkinson's Disease	N		ELECTROENCEPHALOGRAPHY AND CLINICAL NEUROPHYSIOLOGY			CLARE	CUSTOMER RELATIONS MANAGER, BAY 15, SHANNON INDUSTRIAL ESTATE CO, CLARE, IRELAND	0013-4694	JUN	1991
333	Eisen, A; Weber, M	Neurophysiological evaluation of cortical function in the early diagnosis of ALS	The corticomotoneuronal system is selectively vulnerable in amyotrophic lateral sclerosis (ALS), In the past it has been difficult to evaluate the upper motor neuron component of this system. Recent studies using functional imaging and neurophysiological methods are now available as potential surrogate markers in the early diagnosis of ALS, We have used peristimulus time histograms (PSTHs) to eva…	N	No clinical data (EDSS)	N	ALS	N		AMYOTROPHIC LATERAL SCLEROSIS AND OTHER MOTOR NEURON DISORDERS	2000	1		S47	S51
336	Elzamarany, E; Afifi, L; El-Fayoumy, NM; Salah, H; Nada, M	Motor cortex rTMS improves dexterity in relapsing-remitting and secondary progressive multiple sclerosis	The motor cortex (MC) receives an excitatory input from the cerebellum which is reduced in patients with cerebellar lesions. High-frequency repetitive transcranial magnetic stimulation (rTMS) induces cortical facilitation which can counteract the reduced cerebellar drive to the MC. Our study included 24 relapsing-remitting multiple sclerosis (RRMS) and secondary progressive multiple sclerosis (SP…	N	No MEP data	N	Baseline TMS data not compared	N	Baseline TMS data not compared	ACTA NEUROLOGICA BELGICA	2016	116	2	145	150		10.1007/s13760-015-0540-y
337	Enterzari-Taher M., Eisen A., Stewart H., Nakajima M.	Abnormalities of cortical inhibitory neurons in amyotrophic lateral sclerosis	We have used peristimulus time histograms to study how paired, transcranial magnetic stimulation alters the firing of single motor units and the magnitude of unitary excitatory postsynaptic potentials (EPSPs) recorded from the extensor digitorum communis muscle. With stimulus intensity at threshold and an interstimulus interval of 30 ms, normal subjects (n = 20) demonstrated marked inhibition wit…	N	No clinical data (EDSS)	N	ALS	N		Muscle and Nerve (1997) 20:1 (65-71). Date of Publication: 1997							10.1002/(SICI)1097-4598(199701)20:1<65::AID-MUS9>3.0.CO;2-F
340	Escribano, BM; Colin-Gonzalez, AL; Santamaria, A; Tunez, I	The Role of Melatonin in Multiple Sclerosis, Huntington's Disease and Cerebral Ischemia	Melatonin is produced and released by the pineal gland in a circadian rhythm. This neurohormone has proven to be an antioxidant and anti-inflammatory molecule able to reduce or mitigate cell damage associated with oxidative stress and inflammation, and this phenomenon underlies neurodegenerative disorders. These facts have drawn attention to this indole, triggering interest in evaluating its chan…	N	leg	N	No TMS	N		CNS & NEUROLOGICAL DISORDERS-DRUG TARGETS	2014	13	6	1096	1119
341	Eskreis-Winkler, S; Zhang, Y; Zhang, JW; Liu, Z; Dimov, A; Gupta, A; Wang, Y	The clinical utility of QSM: disease diagnosis, medical management, and surgical planning	Quantitative susceptibility mapping (QSM) is an MR technique that depicts and quantifies magnetic susceptibility sources. Mapping iron, the dominant susceptibility source in the brain, has many important clinical applications. Herein, we review QSM applications in the diagnosis, medical management, and surgical treatment of disease. To assist in early disease diagnosis, QSM can identify elevated …	N	Abstract	N	No TMS	N		NMR IN BIOMEDICINE	2017	30	4			e3668	10.1002/nbm.3668
342	Eusebio, A; Azulay, JP; Witjas, T; Rico, A; Attarian, S	Assessment of cortico-spinal tract impairment in multiple system atrophy using transcranial magnetic stimulation	Objective: Among Parkinsonian syndromes, pyramidal signs suggesting cortico-spinal impairment are a hallmark of multiple system atrophy.(MSA). Although it is crucial to diagnose correctly this disease to choose the appropriate treatment, the available diagnostic criteria lack sensitivity. Cortical excitability patterns assessed by transcranial magnetic stimulation (TMS) do not differentiate Parki…	U	Not there	N	Parkinson's Disease	N		CLINICAL NEUROPHYSIOLOGY	2007	118	4	815	823		10.1016/j.clinph.2007.01.004
343	Everaert D.G., Thompson A.K., Su Ling Chong, Stein R.B.	Does functional electrical stimulation for foot drop strengthen corticospinal connections?	Background. Long-term use of a foot-drop stimulator applying functional electrical stimulation (FES) to the common peroneal nerve improves walking performance even when the stimulator is off. This "therapeutic" effect might result from neuroplastic changes. Objective. To determine the effect of long-term use of a foot-drop stimulator on residual corticospinal connections in people with central ne…	Y		N	No TMS	N		Neurorehabilitation and Neural Repair (2010) 24:2 (168-177). Date of Publication: February 2010							10.1177/1545968309349939
346	Facchetti, D; Mai, R; Micheli, A; Marciano, N; Capra, R; Gasparotti, R; Poloni, M	Motor evoked potentials and disability in secondary progressive multiple sclerosis	Background: To investigate the mechanisms underlying disability in multiple sclerosis (MS), 40 patients with the relapsing-remitting form of the disease and 13 patients with secondary progressive MS underwent multimodal evoked potential (EP), motor evoked potential (MEP), and spinal motor conduction time evaluation. Clinical disability was evaluated by the expanded disability status scale (EDSS) …	Y		Y		Y		CANADIAN JOURNAL OF NEUROLOGICAL SCIENCES			CALGARY	PO BOX 4220, STATION C EDITORIAL & SUBSCRIPTION SERV, CALGARY AB T2T 5N1, CANADA	0317-1671	NOV	1997
347	FACCO, E; BARATTO, F; MUNARI, M; DONA, B; LIVIERO, MC; BEHR, AU; GIRON, GP	SENSORIMOTOR CENTRAL CONDUCTION TIME IN COMATOSE PATIENTS	Motor evoked potentials (MEPs) following magnetic stimulation were recorded in 22 patients comatose as a result of head injury (13 cases), stroke (7 cases) or anoxia (2 cases). Somatosensory evoked potentials (SEPs) from median nerve were recorded as well in 19 cases in the same session. Thirteen patients died or remained vegetative (59.1%), 3 were severely disabled (13.6%) and 6 showed a good re…	U	Not there	N	Coma	N		ELECTROENCEPHALOGRAPHY AND CLINICAL NEUROPHYSIOLOGY		Giron, Giampiero/K-2722-2016	CLARE	CUSTOMER RELATIONS MANAGER, BAY 15, SHANNON INDUSTRIAL ESTATE CO, CLARE, IRELAND	0013-4694	NOV-DEC	1991
348	Farzan F.	Single-pulse transcranial magnetic stimulation (TMS) protocols and outcome measures	The integrity of the brain circuitries can be quantified through application of single pulse transcranial magnetic stimulation (TMS) to the cortex and concurrent recording of the neurophysiological response through electromyography at the periphery, and more recently centrally through electroencephalography and functional magnetic resonance imaging. In this chapter, we first introduce the neuroph…	N	No clinical data (EDSS)	N		N		Neuromethods (2014) 89 (69-115). Date of Publication: 2014							10.1007/978-1-4939-0879-0_5
351	Fasano, A; Deuschl, G	Therapeutic Advances in Tremor	Although tremor is a highly prevalent movement disorder, progress in this field is limited because of the poor understanding of many of the underlying conditions. This review summarizes recent treatment attempts since 2013. For essential tremor, recent innovations are phase I or II studies of Octanol, several clinically relevant refinements for deep brain stimulation, and the development of the n…	N	"demyelinating lesions in the CNS"	N	Irrelevant Review	N		MOVEMENT DISORDERS	2015	30	11	1557	1565		10.1002/mds.26383
352	Fassbender, K; Schmidt, R; Mossner, R; Kischka, U; Kuhnen, J; Schwartz, A; Hennerici, M	Mood disorders and dysfunction of the hypothalamic-pituitary-adrenal axis in multiple sclerosis - Association with cerebral inflammation	Objective: To investigate the association between affective and neuroendocrine abnormalities, commonly observed in multiple sclerosis, with inflammatory disease activity. Design: Cross-sectional design. Twenty-three patients with definite relapsing-remitting multiple sclerosis and age-and sex-matched control subjects were investigated. Depression and anxiety were assessed using structured intervi…	N	Clinically isolated syndrome	N	No TMS	N		ARCHIVES OF NEUROLOGY			CHICAGO	515 N STATE ST, CHICAGO, IL 60610 USA	0003-9942	JAN	1998
353	Fayet G., Pegat B., Kassam R., Magot A., Roualdes V., N'Guyen J.-P., Pereon Y.	Quantitative assessment of the cerebello-cortical inhibition by double-pulse transcranial magnetic stimulation in patients with cerebellar alterations	Introduction: A conditioning transcranial magnetic stimulation (TMS) over the cerebellum reduces the excitatory state of the controlateral primary motor cortex. This reduction has been termed “cerebellar inhibition” and is supposed to be triggered by Purkinje cells activation leading to the inhibition of the motor cortex via dentato-thalamo-cortical pathways. The assessment of this cerebellar cor…	N	Poster abstract	N	Conference	N	Conference	Clinical Neurophysiology (2014) 125 SUPPL. 1 (S241). Date of Publication: June 2014
354	Feinstein A., Magalhaes S., Richard J.-F., Audet B., Moore C.	The link between multiple sclerosis and depression	Depression-be it a formal diagnosis based on consensus clinical criteria, or a collection of symptoms revealed by a self-report rating scale-is common in patients with multiple sclerosis (MS) and adds substantially to the morbidity and mortality associated with this disease. This Review discusses the prevalence and epidemiology of depression in patients with MS, before covering aetiological facto…	N	Conference	N	No TMS	N		Nature Reviews Neurology (2014) 10:9 (507-517). Date of Publication: 1 Sep 2014							10.1038/nrneurol.2014.139
356	FEISTNER, H; AWISZUS, F; ROTTE, M; HINRICHS, H; HEINZE, HJ	CHANGES IN THE RESPONSE PATTERN OF SINGLE MOTOR UNITS TO TRANSCRANIAL MAGNETIC STIMULATION IN PATIENTS WITH AMYOTROPHIC-LATERAL-SCLEROSIS	Transcranial magnetic stimulation evokes a short-latency excitation in hand-muscle motor units of normal subjects. It was tested in this study, if alterations of this response-pattern may be found in patients with amyotrophic lateral sclerosis. During a slight voluntary activation of the first dorsal interosseus muscle, the spike sequence of a single motor unit was registered and a series of tran…	N	Editorial commentary	N	ALS	N		EEG-EMG-ZEITSCHRIFT FUR ELEKTROENZEPHALOGRAPHIE ELEKTROMYOGRAPHIE UND VERWANDTE GEBIETE		Awiszus, Friedemann/F-5905-2013	STUTTGART	P O BOX 30 11 20, D-70451 STUTTGART, GERMANY	0012-7590	MAR	1995
357	Feistner, H; Awiszus, F; Sailer, M; Hinrichs, H; Heinze, HJ	Method for rapid response estimation of single human motoneurons to transcranial magnetic and peripheral electrical stimulation	An indirect quantification of stimulus-induced postsynaptic events at single human spinal motoneurons is possible, at least to some extent, by means of a cross-correlation of stimuli with the ongoing discharge of a single motor unit. Stimuli used in humans are usually peripheral electrical stimuli evoking a la EPSP and transcranial magnetic stimulation of the motor cortex inducing a corticomotone…	U	Not there	N	Healthy controls only	N		EEG-EMG-ZEITSCHRIFT FUR ELEKTROENZEPHALOGRAPHIE ELEKTROMYOGRAPHIE UND VERWANDTE GEBIETE		Awiszus, Friedemann/F-5905-2013	STUTTGART	P O BOX 30 11 20, D-70451 STUTTGART, GERMANY	0941-3790	JUN	1996
358	Fernández O., Fernández V.	Evoked potentials are of little use in the diagnosis or monitoring of MS: No		N	MS data from previous study	N	Letter	N		Multiple Sclerosis Journal (2013) 19:14 (1822-1823). Date of Publication: December 2013							10.1177/1352458513506955
360	Fernandez V., Postigo M.J., Urbaneja P., Leon A., Alonso A., Guerrero M., Fernandez O.	Comparing objective measures of neurodegeneration in multiple sclerosis (MS)	Background: MS is a disease of the central nervous system (CNS) characterized by inflammation, demyelination and axonal loss. Neurodegeneration seems to be present from the beginning of the disease and is the main cause of progression of irreversible neurological deficits. Easy and low cost measures of axonal loss are lacking. Evoked potentials allows us the functional study of CNS. Visual (VEP) …	U	Not there	N	Conference	N	OPTIC NEURITIS	Multiple Sclerosis (2013) 19:11 SUPPL. 1 (39). Date of Publication: October 2013							10.1177/1352458513502433
363	Fernandez V., Postigo M.J., Urbaneja P., León A., Alonso A., Guerrero M., Fernández O.	Measuring axonal loss in multiple sclerosis	Background: MS is an inflammatory disease of the central nervous system (CNS) characterized by demyelination and axonal loss. It would be of crucial importance to have objective markers of the axonal loss that is the main cause of progression and irreversible neurological deficits. Evoked potentials allow us the functional study of CNS. Visual (VEP) and motor evoked potentials (MEP) have already …	N	Poster session	N	Conference	N	OPTIC NEURITIS	Multiple Sclerosis (2012) 18:4 SUPPL. 1 (173). Date of Publication: October 2012							10.1177/1352458512459019
364	Fernandez, FJM; Escribano, BM; Tunez, I	COMMENTARY Transcranial Magnetic Stimulation in Multiple Sclerosis: A Method to Improve Movement		U	"diagnosis of definite relapsing-remititng (RR)"	N	Commentary	N		CNS & NEUROLOGICAL DISORDERS-DRUG TARGETS	2017	16	3	218	219		10.2174/1871527316666170116161134
365	Fernandez, V; Valls-Sole, J; Relova, JL; Raguer, N; Miralles, F; Dinca, L; Taramundi, S; Costa-Frossardo, L; Ferrandiz, M; Ramio-Torrenta, L; Villoslada, P; Saiz, A; Callesef, C; Antiguedad, A; Alvarez-Cermeno, JC; Prieto, JM; Izquierdo, G; Montalban, X; Fernandez, Y	Recommendations for the clinical use of motor evoked potentials in multiple sclerosis	Objective: To establish clinical guidelines for the clinical use and interpretation of motor evoked potentials (MEP) in diagnosing and monitoring patients with multiple sclerosis (MS). Recommendations for MEP use and interpretation will help us rationalise and optimise resources used in MS patient diagnosis and follow up. Method: We completed an extensive literature review and pooled our own data…	U	Report change in EDSS but can't see figure (no means)	R		R		NEUROLOGIA	2013	28	7	408	416		10.1016/j.nrl.2012.07.007
366	Ferreira, JJ; Rosser, A; Craufurd, D; Squitieri, F; Mallard, N; Landwehrmeyer, B	Ethyl-Eicosapentaenoic Acid Treatment in Huntington's Disease: A Placebo-Controlled Clinical Trial	Background: It has been suggested that treatment with ethyl-eicosapentaenoic acid (EPA) may improve motor function in patients with Huntington's disease (HD) with cytosine-adenine-guanine repeat numbers of <45. Methods: This multicenter, randomized, double-blind, placebo-controlled 6-month trial compared the effects of ethyl-EPA versus placebo on 290 subjects with mild-to-moderate HD. The primary…	Y		N	No TMS	N		MOVEMENT DISORDERS	2015	30	10	1426	1429		10.1002/mds.26308
367	Ferrucci, R; Marceglia, S; Vergari, M; Cogiamanian, F; Mrakic-Sposta, S; Mameli, F; Zago, S; Barbieri, S; Priori, A	Cerebellar transcranial direct current stimulation impairs the practice-dependent proficiency increase in working memory	How the cerebellum is involved in the practice and proficiency of non-motor functions is still unclear. We tested whether transcranial direct current stimulation (tDCS) over the cerebellum (cerebellar tDCS) induces after-effects on the practice-dependent increase in the proficiency of a working memory (WM) task (Sternberg test) in 13 healthy subjects. We also assessed the effects of cerebellar tD…	Y		N	No TMS	N		JOURNAL OF COGNITIVE NEUROSCIENCE	2008	20	9	1687	1697		10.1162/jocn.2008.20112
368	Feuillet L., Pelletier J., Suchet L., Rico A., Cherif A.A., Pouget J., Attarian S.	Prospective clinical and electrophysiological follow-up on a multiple sclerosis population treated with interferon beta-1a: A pilot study	Objective: To analyse transcranial magnetic stimulation (TMS) variables in a prospective six-month follow-up pilot study on patients suffering from relapsing-remitting multiple sclerosis (RRMS), satisfying inclusion criteria for interferon (IFN) beta-1a treatment. Background: So far, no predictive factors are available as to the course of RRMS treated with IFN beta-1a. Design/methods: Fifteen RRM…	Y		N	No healthy control group	N		Multiple Sclerosis (2007) 13:3 (348-356). Date of Publication: April 2007							10.1177/1352458506070235
371	Fierro B., Salemi G., Brighina F., Buffa D., Conte S., La Bua V., Piazza A., Savettieri G.	A transcranial magnetic stimulation study evaluating methylprednisolone treatment in multiple sclerosis	Objective - To investigate the efficacy of two different high doses of intravenous methylprednisolone (IVMP) during Multiple Sclerosis (MS) relapses. Background - Transcranial Magnetic Stimulation (TMS) is the most sensitive neurophysiological ascertainment to quantify motor disability, to follow the recovery from an MS relapse, and to detect the response to treatment. Design and method - Twenty-…	N	No healthy control group	N	No healthy control group	N		Acta Neurologica Scandinavica (2002) 105:3 (152-157). Date of Publication: 2002							10.1034/j.1600-0404.2002.1o369.x
374	Finnerup N.B.	A review of central neuropathic pain states	Purpose of review: Central neuropathic pain is an important and disabling but often neglected problem following central nervous system lesions. The present review highlights recent advances in the understanding of the underlying mechanisms and in the diagnosis and treatment of central pain. Recent findings: Within the past year, the field of central pain has moved toward a more integrative unders…	N	No healthy control group	N	Irrelevant Review	N		Current Opinion in Anaesthesiology (2008) 21:5 (586-589). Date of Publication: October 2008							10.1097/ACO.0b013e32830a4c11
376	Firmin L., Müller S., Rösler K.M.	The latency distribution of motor evoked potentials in patients with multiple sclerosis	Objective: To compare the individual latency distributions of motor evoked potentials (MEP) in patients with multiple sclerosis (MS) to the previously reported results in healthy subjects (Firmin et al., 2011). Methods: We applied the previously reported method to measure the distribution of MEP latencies to 16 patients with MS. The method is based on transcranial magnetic stimulation and consist…	Y		U	Demographics for controls not provided.	Y		Clinical Neurophysiology (2012) 123:12 (2414-2421). Date of Publication: December 2012							10.1016/j.clinph.2012.05.008
379	Fischer, C; Andre-Obadia, N; Mauguiere, F	Diagnostic criteria of multiple sclerosis: electrophysiological criteria	We have made a review on the use of evoked potentials in multiple sclerosis (MS) for the past 30 years, in the diagnosis of MS, to disclose subclinical lesions or to assess atypical symptoms. Yet the role of evoked potentials in evaluation of multiple sclerosis has been changed since MRI is now widely and easily used for the diagnosis of MS. Evoked potentials are useful when symptoms are atypical…	N	leg	N		N		REVUE NEUROLOGIQUE	2001	157	8-9	974	980
380	Fisher, BE; Lee, YY; Pitsch, EA; Moore, B; Southam, A; Faw, TD; Powers, CM	Method for Assessing Brain Changes Associated With Gluteus Maximus Activation	STUDY DESIGN: Reliability study. OBJECTIVES: To determine the feasibility and reliability of using transcranial magnetic stimulation (TMS) to assess corticomotor excitability (CE) of the gluteus maximus. BACKGROUND: Sport-specific skill training targeting greater utilization of the gluteus maximus has been proposed as a method to reduce the incidence of noncontact knee injuries. The use of TMS to…	N	Poster session	N	Healthy controls only	N		JOURNAL OF ORTHOPAEDIC & SPORTS PHYSICAL THERAPY	2013	43	4	214	221		10.2519/jospt.2013.4188
381	Fling B.W., Peltier S.J., Bo J., Welsh R.C., Seidler R.D.	Age differences in interhemispheric interactions: Callosal structure, physiological function, and behavior	There is a fundamental gap in understanding how brain structural and functional network connectivity are interrelated, how they change with age, and how such changes contribute to older adults' sensorimotor deficits. Recent neuroimaging approaches including resting state functional connectivity MRI (fcMRI) and diffusion tensor imaging (DTI) have been used to assess brain functional (fcMRI) and st…	N	Poster session	N	No TMS	N		Frontiers in Neuroscience (2011) :MAR Article Number: 38. Date of Publication: 2011							10.3389/fnins.2011.00038
382	Fling, BW; Benson, BL; Seidler, RD	Transcallosal sensorimotor fiber tract structure-function relationships	Recent studies have demonstrated neuroanatomically selective relationships among white matter tract microstructure, physiological function, and task performance. Such findings suggest that the microstructure of transcallosal motor fibers may reflect the capacity for interhemispheric inhibition between the primary motor cortices, although full characterization of the transcallosal inhibitory senso…	N	Poster session	N	Irrelevant Review	N		HUMAN BRAIN MAPPING	2013	34	2	384	395		10.1002/hbm.21437
383	Fling, BW; Dutta, GG; Horak, FB	Functional connectivity underlying postural motor adaptation in people with multiple sclerosis	A well-characterized neural network is associated with motor learning, involving several brain regions known to have functional and structural deficits in persons with multiple sclerosis (PwMS). However, it is not known how MS affects postural motor learning or the neural networks involved. The aim of this study was to gain a better understanding of the neural networks underlying adaptation of po…	N	Strange inclusion (not sure if all MS?)	N	No TMS	N		NEUROIMAGE-CLINICAL	2015	8		281	289		10.1016/j.nicl.2015.04.023
384	Fling, BW; Seidler, RD	Fundamental Differences in Callosal Structure, Neurophysiologic Function, and Bimanual Control in Young and Older Adults	Bimanual actions involve coordinated motion but often rely on the movements performed with each hand to be different. Older adults exhibit differentially greater variability for bimanual actions in which each hand has an independent movement goal. Such actions rely on interhemispheric communication via the corpus callosum, including both facilitatory and inhibitory interactions. Here, we investig…	N	Progressive group all multiple patients	N	Healthy controls only	N		CEREBRAL CORTEX	2012	22	11	2643	2652		10.1093/cercor/bhr349
386	Floel A., Cohen L.G.	Recovery of function in humans: Cortical stimulation and pharmacological treatments after stroke	In this contribution, we first provide an overview of general principles of reorganisation in the human brain, and point out possible biomarkers of recovery. Subsequently, we expand on possibilities of adjuvant therapy in human rehabilitation using cortical stimulation and pharmacological treatments. Finally, we suggest future directions for research in this field. © 2009 Elsevier Inc.	N	Abstract	N	Irrelevant Review	N		Neurobiology of Disease (2010) 37:2 (243-251). Date of Publication: February 2010							10.1016/j.nbd.2009.05.027
387	Forstmann, BU; de Hollander, G; van Maanen, L; Alkemade, A; Keuken, MC	Towards a mechanistic understanding of the human subcortex	The human subcortex is a densely populated part of the brain, of which only 7% of the individual structures are depicted in standard MRI atlases. In vivo MRI of the subcortex is challenging owing to its anatomical complexity and its deep location in the brain. The technical advances that are needed to reliably uncover this 'terra incognita' call for an interdisciplinary human neuroanatomical appr…	N	Abstract	N	Irrelevant Review	N		NATURE REVIEWS NEUROSCIENCE	2017	18	1	57	65		10.1038/nm.2016.163
388	Fragoso Y.D.	The internet racing ahead of the scientific evidence: The case of "liberation treatment" for multiple sclerosis	Multiple sclerosis (MS) is a chronic neurological disease that typically affects young adults. A recent publication suggested that MS might originate from insufficient blood drainage in certain areas of the central nervous system. The condition was named chronic cerebrospinal venous insufficiency (CCSVI). Other papers have not confirmed these findings and, therefore, the matter remains controvers…	N	No clinical data	N	No TMS	N		Arquivos de Neuro-Psiquiatria (2011) 69:3 (525-527). Date of Publication: June 2011							10.1590/S0004-282X2011000400022
391	Fregni F., Pascual-Leone A.	Transcranial magnetic stimulation for the treatment of depression in neurologic disorders	Depression is commonly as sociated with neurologic disorders. Although depression in neurologic conditions often is associated with a negative impact on quality of life, it frequently is poorly managed. Some factors, such as a multidrug regimen, lack of efficacy, and side effects of antidepressants may explain why depression is not adequately treated in patients with neurologic disorders. Therefo…	N	17 to 56 years	N		N		Current Psychiatry Reports (2005) 7:5 (381-390). Date of Publication: October 2005
392	Freund, P; Rothwell, J; Craggs, M; Thompson, AJ; Bestmann, S	Corticomotor representation to a human forearm muscle changes following cervical spinal cord injury	Functional imaging studies, using blood oxygen level-dependent signals, have demonstrated cortical reorganization of forearm muscle maps towards the denervated leg area following spinal cord injury (SCI). The extent of cortical reorganization was predicted by spinal atrophy. We therefore expected to see a similar shift in the motor output of corticospinal projections of the forearm towards more d…	N	from 17 to 48 years	N	Spinal cord injury	N		EUROPEAN JOURNAL OF NEUROSCIENCE	2011	34	11	1839	1846		10.1111/j.1460-9568.2011.07895.x
393	Freund, P; Weiskopf, N; Ward, NS; Hutton, C; Gall, A; Ciccarelli, O; Craggs, M; Friston, KJ; Thompson, AJ	Disability, atrophy and cortical reorganization following spinal cord injury	The impact of traumatic spinal cord injury on structural integrity, cortical reorganization and ensuing disability is variable and may depend on a dynamic interaction between the severity of local damage and the capacity of the brain for plastic reorganization. We investigated trauma-induced anatomical changes in the spinal cord and brain, and explored their relationship to functional changes in …	N	Tib An	N	Spinal cord injury	N		BRAIN	2011	134		1610	1622		10.1093/brain/awr093
394	Freynhagen R., Bennett M.I.	Diagnosis and management of neuropathic pain		N	Conference	N	Irrelevant Review	N		BMJ (Online) (2009) 339:7717 (391-395). Date of Publication: 15 Aug 2009							10.1136/bmj.b3002
397	Fryze W., Mirowska-Guzel D., Wiszniewska M., Darda-Ledzion L., Czlonkowska A., Czlonkowska A.	Alternative methods of treatment used by multiple sclerosis patients in Poland	Background and purpose: Despite the great process that has been made in medicine, treatment of many chronic diseases, including multiple sclerosis (MS), remains hardly effective. It has been reported that more and more MS patients worldwide are using alternative methods (AM). The aim of the present study is to evaluate this phenomenon in the Polish MS population. Materials and methods: To obtain …	N	Conference	N	No TMS	N		Neurologia i Neurochirurgia Polska (2006) 40:5 (386-390). Date of Publication: 2006
398	Fuhr P.	Utility of TMS in prediction of disability progression in multiple sclerosis	Assessing disease course and prognosis of MS is challenging for multiple reasons, among them: (1) there are three main disease course types (relapsing remitting, secondary progressive, and the much rarer primary progressive form); (2) lesions are by definition multiple in time and location; (3) pathological lesions may be clinically silent; (4) pathological patterns of MS lesions differ; (5) infl…	N	leg	N		N		Clinical Neurophysiology (2014) 125 SUPPL. 1 (S4). Date of Publication: June 2014
399	Fuhr P., Schindler C.	Clinical Neurophysiology in multiple sclerosis - From diagnostic tool to biomarker		N	No clinical data (EDSS)	N	Editorial	N		Clinical Neurophysiology (2015) 126:1 (7-9). Date of Publication: 1 Jan 2015							10.1016/j.clinph.2014.06.003
401	Fuhr, P; Borggrefe-Chappuis, A; Schindler, C; Kappos, L	Visual and motor evoked potentials in the course of multiple sclerosis	While evoked potentials are sensitive tools for diagnosing multiple sclerosis, little is known about their prognostic value and their role in determining the course of the disease. To validate the visual and motor evoked potentials (VEP and MEP) as measures for the course of multiple sclerosis, we examined prospectively 30 patients with relapsing-remitting or secondary progressive multiple sclero…	N	Poster session	N	No healthy control group	N		BRAIN	2001	124		2162	2168		10.1093/brain/124.11.2162
402	FUHR, P; COHEN, LG; ROTH, BJ; HALLETT, M	LATENCY OF MOTOR EVOKED-POTENTIALS TO FOCAL TRANSCRANIAL STIMULATION VARIES AS A FUNCTION OF SCALP POSITIONS STIMULATED	We recorded motor evoked potentials (MEP) to transcranial magnetic stimulation from abductor pollicis brevis (APB), flexor carpi radialis (FCR), biceps brachii and deltoid muscles at rest and during slight voluntary activation. An 8-shaped coil connected to a Cadwell MES-10 magnetic stimulator was positioned over different scalp positions 1 cm apart. At least 24 stimuli were delivered at each loc…	N	Poster session	N	Healthy controls only	N		ELECTROENCEPHALOGRAPHY AND CLINICAL NEUROPHYSIOLOGY		Roth, Bradley/A-4920-2008	CLARE	CUSTOMER RELATIONS MANAGER, BAY 15, SHANNON INDUSTRIAL ESTATE CO, CLARE, IRELAND	0013-4694	APR	1991
404	Fujihara, K; Miyoshi, T	The effects of 4-aminopyridine on motor evoked potentials in multiple sclerosis	In order to study the effects of 4-aminopyridine (4-AP) on impulse conduction in multiple sclerosis (MS), we studied motor-evoked potentials (MEPs) in the upper (U/E) and lower extremities (L/E) of six MS patients with stable spastic paraparesis before and after intravenous administration of 4-AP. As a result, we found a significant increase in mean amplitudes in U/E and L/E (P=0.008) and a signi…	Y		N	No healthy control group	N		JOURNAL OF THE NEUROLOGICAL SCIENCES			AMSTERDAM	PO BOX 211, 1000 AE AMSTERDAM, NETHERLANDS	0022-510X	JUL 15	1998
405	FURBY, A; BOURRIEZ, JL; JACQUESSON, JM; MOUNIERVEHIER, F; GUIEU, JD	MOTOR EVOKED-POTENTIALS TO MAGNETIC STIMULATION - TECHNICAL CONSIDERATIONS AND NORMATIVE DATA FROM 50 SUBJECTS	Magnetic stimulation of the brain and cervical and lumbar spinal roots was performed on 50 healthy volunteers. Compound muscle action potentials (CMAPs) were recorded from biceps brachii, abductor digiti minimi (ADM), rectus femoris and tibialis anterior (TA). We assessed central conduction times by subtraction of peripheral from central latencies and compared results using either spinal root sti…	N	Poster session	N	Healthy controls only	N		JOURNAL OF NEUROLOGY			NEW YORK	175 FIFTH AVE, NEW YORK, NY 10010	0340-5354	MAR	1992
406	Gabelic, T; Skoric, MK; Adamec, I; Mayer, D; Habek, M	Tongue Somatosensory-Evoked Potentials: Evaluation of the Afferent Trigeminal Pathway in Patients With Early Multiple Sclerosis	The aim of this study was to determine the efficacy of tongue somatosensory-evoked potentials (tSSEPs) in evaluation of afferent trigeminal pathway in patients with early multiple sclerosis (MS). The tSSEP was performed on 10 healthy volunteers and 10 patients with the first symptom of MS. Data were compared between the groups, and tSSEP findings of patients with MS were correlated with clinical …	N	conference	N	No TMS	N		CLINICAL EEG AND NEUROSCIENCE	2013	44	4	286	290		10.1177/1550059412467447
407	Gaede G., Hellweg R., Zimmermann H., Brandt A.U., Dörr J., Bellmann-Strobl J., Zangen A., Paul F., Pfueller C.F.	Effects of deep repetitive transcranial magnetic stimulation on brain-derived neurotrophic factor serum concentration in healthy volunteers	Objective: Repetitive transcranial magnetic stimulation (rTMS) is a noninvasive, safe and efficacious technique for treating various neuropsychiatric disorders, but its underlying mechanisms are poorly understood. A newly developed H-coil allows the stimulation of deeper brain regions. This study is the first to investigate the effects of deep high-frequency rTMS on brain-derived neurotrophic fac…	Y		N	Healthy controls only	N		Neuropsychobiology (2014) 69:2 (112-119). Date of Publication: 2014							10.1159/000358088
411	Gaede G., Tiede M., Lorenz I., Pfueller C., Doerr J., Bellmann-Strobl J., Zangen A., Paul F., Schippling S.	Deep repetitive transcranial magnetic stimulation can improve depression and fatigue in multiple sclerosis: Results from a clinical phase 1/2a study	Background: Fatigue and depression are frequent symptoms in patients with multiple sclerosis (MS), affecting up to 90% at onset or during the course of the disease. The underlying pathobiology is poorly understood, and - as regards fatigue - evidence-based therapeutic strategies are limited. Repetitive transcranial magnetic stimulation (rTMS) has shown efficacy in the treatment of major depressio…	Y		N	No healthy control group	N		Multiple Sclerosis (2013) 19:11 SUPPL. 1 (49). Date of Publication: October 2013							10.1177/1352458513502433
412	Gaede G., Tiede M., Lorenz I., Pfueller C.F., Doerr J., Bellmann-Strobl J., Zangen A., Schippling S., Paul F.	Deep transcranial magnet stimulation improves depression and fatigue in multiple sclerosis	Introduction: Fatigue and depression are among the most frequent symptoms in multiple sclerosis (MS), affecting up to 90% of patients at onset or during the course of the disease. Repetitive transcranial magnetic stimulation (rTMS) has proven safe and efficacious for treating depression. Objective: To perform a randomized, sham-controlled pilot study to evaluate effects of deep rTMS on fatigue an…	N	criteria? No official diagnosis	N	No healthy control group	N		European Psychiatry (2013) 28 SUPPL. 1. Date of Publication: 2013
413	Gaede G., Tiede M., Lorenz I., Zimmermann H., Pfueller C.F., Dörr J., Bellmann-Strobl J., Ginou A., Zangen A., Schippling S., Paul F.	Safety and efficacy of repetitive deep transcranial magnetic stimulation in multiple sclerosis	Background: Fatigue is one of the most frequent symptoms in multiple sclerosis (MS), affecting up to 90 % of patients at onset or during the course of the disease. Neither are underlying mechanisms understood, nor do convincing therapies exist. Repetitive transcranial magnetic stimulation (rTMS) has proven safe and efficacious for treating depression. Newly developed coils, like the novel H-Coil,…	U	not there	N	No healthy control group	N		Journal of Neurology (2012) 259:1 SUPPL. 1 (S190-S191). Date of Publication: June 2012							10.1007/s00415-012-6524-4
417	Gagliardo A., Galli F., Grippo A., Amantini A., Martinelli C., Amato M.P., Borsini W.	Motor evoked potentials in multiple sclerosis patients without walking limitation: Amplitude vs. conduction time abnormalities	We used Motor Evoked Potentials (MEPs), elicited by transcranial magnetic stimulation, for assessing a motor pathways dysfunction in a selected group of Multiple Sclerosis (MS) patients, without limitation in walking. We selected 32 Relapsing Remitting MS patients, in remission phase, with EDSS ≤3.5 and 20 healthy individuals with similar height and age distribution. We measured the following MEP…	N	Leg	N	Lower limb	N	Lower limb	Journal of Neurology (2007) 254:2 (220-227). Date of Publication: February 2007							10.1007/s00415-006-0334-5
420	Gagliardo, A; Giannini, M; Hakiki, B; Martinelli, C; Vettori, A; Borsini, W; Grippo, A; Pinto, F; Amato, MP; Amantini, A	Benign multiple sclerosis patients: a transcranial magnetic stimulation study		N	Poster session	N	Conference	N	Conference	EUROPEAN JOURNAL OF NEUROLOGY	2008	15		275	275
421	Galazka M., Soszynski D., Dmitruk K.	Central Action of Botulinum Toxin Type A – Is It Possible?	Botulinum toxin (BoTx) is a product of gram-positive anaerobic bacteria of the Clostridium genus. At present, seven serotypes (A to G) of BoTx have been identified. Each of them functions as a zincdependent endopeptidase that hydrolyzes peptide bonds within soluble N-ethylmaleimide-sensitive factor attaching protein receptors. BoTx affects proteins required for neurotransmitter release through pr…	U	Physician recruited?	N	No TMS	N		Neurophysiology (2015) 47:4 (326-336). Date of Publication: 1 Aug 2015							10.1007/s11062-015-9540-z
422	Gandelman-Marton R., Arlazoroff A., Dvir Z.	Posturography in MS patients treated with high dose methylprednisolone	Objectives: To evaluate the sensitivity of the balance sway index (SI) to drug-induced functional changes during acute relapse in patients with MS. Methods: Dynamic posturography was used to derive the SI in 11 healthy subjects and 13 MS patients before and after intravenous high dose methylprednisolone (HDMP). Results: In both groups, SI was lower in the least demanding task and increased with t…	U	criteria? No official diagnosis	N	No TMS	N		Neurological Research (2016) 38:7 (570-574). Date of Publication: 21 Apr 2016							10.1080/01616412.2016.1177927
424	Gangitano M., Ragonese P., Battaglini J., Realmuto S., Salemi G., Fierro B., Savettieri G.	Modulation of action tremor by repetitive transcranial magnetic stimulation in multiple sclerosis patients	Background: Patients affected by Multiple Sclerosis (MS) can show a tremor of their upper limbs, mostly during the performing of finalised action (action tremor) or at the maintaining of a position against gravity (postural tremor), as key clinical feature of their disease. Objectives: In order to reduce the tremor, patients underwent to repetitive transcranial magnetic stimulation (rTMS) of the …	N		N	No healthy control group	N		Multiple Sclerosis (2014) 20:1 SUPPL. 1 (373-374). Date of Publication: September 2014							10.1177/1352458514547846
426	Gareau, PJ; Gati, JS; Menon, RS; Lee, D; Rice, G; Mitchell, JR; Mandelfino, P; Karlik, SJ	Reduced visual evoked responses in multiple sclerosis patients with optic neuritis: Comparison of functional magnetic resonance imaging and visual evoked potentials	The limited application of functional magnetic resonance imaging (fMRI) for investigations of multiple sclerosis (MS) patients has already shown that deficits of the motor, cognitive and visual systems may be identified by differences in the patterns of activation in response to a suitable stimulus. In MS patients with unilateral optic neuritis, the area of activation in the primary visual cortex…	U		N	No TMS	N		MULTIPLE SCLEROSIS		Frank, David/E-8213-2012; Gati, Joseph/K-5476-2013; Foster, Paula/M-2201-2013; Menon, Ravi/K-5500-2013	BASINGSTOKE	HOUNDMILLS, BASINGSTOKE RG21 6XS, HAMPSHIRE, ENGLAND	1352-4585	JUN	1999
427	Garland, SJ; Miles, TS	Responses of human single motor units to transcranial magnetic stimulation	Transcranial electromagnetic brain stimuli elicit a complex response in the electromyogram of active human hand muscles. Relatively weak stimuli evoke a short-latency primary response via a presumably monosynaptic corticospinal path. This is followed by a silent period that is terminated by a second peak at a latency of 50-80 ms. The responses evoked in single motor units in flexor digitorum prof…	N		N	Healthy controls only	N		ELECTROMYOGRAPHY AND MOTOR CONTROL-ELECTROENCEPHALOGRAPHY AND CLINICAL NEUROPHYSIOLOGY			CLARE	CUSTOMER RELATIONS MANAGER, BAY 15, SHANNON INDUSTRIAL ESTATE CO, CLARE, IRELAND	0924-980X	APR	1997
428	Gass, A; Rocca, MA; Agosta, F; Ciccarelli, O; Chard, D; Valsasina, P; Brooks, JCW; Bischof, A; Eisele, P; Kappos, L; Barkhof, F; Filippi, M	MRI monitoring of pathological changes in the spinal cord in patients with multiple sclerosis	The spinal cord is a clinically important site that is affected by pathological changes in most patients with multiple sclerosis; however, imaging of the spinal cord with conventional MRI can be difficult. Improvements in MRI provide a major advantage for spinal cord imaging, with better signal-to-noise ratio and improved spatial resolution. Through the use of multiplanar MRI, identification of d…	N		N	No TMS	N		LANCET NEUROLOGY	2015	14	4	443	454		10.1016/S1474-4422(14)70294-7
429	Geisseler, O; Pflugshaupt, T; Buchmann, A; Bezzola, L; Reuter, K; Schuknecht, B; Weller, D; Linnebank, M; Brugger, P	Random number generation deficits in patients with multiple sclerosis: Characteristics and neural correlates	Human subjects typically deviate systematically from randomness when attempting to produce a sequence of random numbers. Despite an increasing number of behavioral and functional neuroimaging studies on random number generation (RNG), its structural correlates have never been investigated. We set out to fill this gap in 44 patients with multiple sclerosis (MS), a disease whose impact on RNG has n…	N		N	No TMS	N		CORTEX	2016	82		237	243		10.1016/j.cortex.2016.05.007
430	GEKHT, BM; KHARABADZE, GG; NOVOSADOVA, MV	MAGNETIC STIMULATION IN THE DIAGNOSIS OF CNS AND PNS DISORDERS	Magnetic stimulation of the cerebral cortex and roots CVI-CVII and LII-LIV was performed in 19 healthy subjects, 45 multiple sclerosis (MS), 21 lateral amyotrophic sclerosis and 24 demyelinizing polyneuropathy patients. M-response of m. Abdueter digiti min (AdV) and m. Tibialis ant. (TA) was registered. The difference of M-response latent time induced by the stimulation, CVI-CVII and LII-LIV dete…	N	Abstract	N	Not English	N	Not English	ZHURNAL NEVROPATOLOGII I PSIKHIATRII IMENI S S KORSAKOVA			MOSCOW	PETROVERIGSKII PER 6-8, K-142 MOSCOW, RUSSIA	0044-4588		1994
431	Gelli, F; Del Santo, F; Mazzocchio, R; Rossi, A	Force estimation processing as a function of the input-output relationship of the corticospinal pathway in humans	Static changes of the shoulder joint from 30 degrees adduction (ANT) to 30 degrees abduction (POST) in the horizontal plane reduce the gain of the input-output relationship of the corticospinal pathway to the abductor digiti minimi (ADM) muscle [F. Ginanneschi et al. (2005) Exp. Brain Res., 161, 374-382]. The present study examined force estimation under conditions in which the input-output relat…	N		N	Healthy controls only	N		EUROPEAN JOURNAL OF NEUROSCIENCE	2005	22	5	1127	1134		10.1111/j.1460-9568.2005.04287.x
432	Gentile A., Mori F., Bernardini S., Centonze D.	Role of amyloid-β CSF levels in cognitive deficit in MS	Multiple sclerosis (MS) is the most common neurological disease of the young adults. Although being long considered as a pure white matter (WM) disease, growing evidence indicates that in MS the gray matter (GM) is affected as well, and that GM pathology correlates with cognitive function deterioration in MS. Indeed, MS is increasingly recognized to cause cognitive deficits since its early stages…	N		N	No TMS	N		Clinica Chimica Acta (2015) 449 (23-30). Date of Publication: 20 Sep 2015							10.1016/j.cca.2015.01.035
435	Ghezzi A., Callea L., Zaffaroni M., Zibetti A., Montanini R.	Study of motor conduction by magnetic stimulation in multiple sclerosis. Part 1: Technical and interpretative considerations		U	Not there	U	Unable to find online	N	Cannot obtain article	Rivista di Neurobiologia (1991) 37:3 (81-87). Date of Publication: 1991
436	Ghezzi A., Callea L., Zaffaroni M., Zibetti A., Montanini R.	Study of motor conduction by magnetic stimulation in multiple sclerosis. Part 2: Clinical correlations		U	Not there	U	Unable to find online	N	Cannot obtain article	Rivista di Neurobiologia (1991) 37:3 (89-93). Date of Publication: 1991
438	Ghezzi A., Malvestiti G.M., Baldini S., Zaffaroni M., Zibetti A.	Erectile impotence in multiple sclerosis: A neurophysiological study	Pudendal evoked potentials, motor evoked potentials of the bulbocavernosus muscle to magnetic stimulation and bulbocavernosus reflex were recorded in 34 patients with multiple sclerosis (MS). Responses were delayed in 26, 20 and 3 cases respectively. No relationship was found between neurophysiological abnormalities and the presence or severity of erectile dysfunction, showing that these tests ha…	N		N	No upper- or lower-limb EMG	N		Journal of Neurology (1995) 242:3 (123-126). Date of Publication: 1995							10.1007/BF00936883
439	GHEZZI, A; CALLEA, L; ZAFFARONI, M; ZIBETTI, A; MONTANINI, R	STUDY OF CENTRAL AND PERIPHERAL MOTOR CONDUCTION IN NORMAL SUBJECTS	Motor potentials to transcranial and cervical magnetic stimulation and F-wave were recorded in 37 arms of 25 normal subjects. Clockwise and anticlockwise cervical stimulation were performed over C5, C7 and T2 spinous processes. A significant correlation was found between height and measurements of central and peripheral motor conduction. Peripheral motor conduction measured by F-wave derived tech…	N		N	Healthy controls only	N		ACTA NEUROLOGICA SCANDINAVICA			COPENHAGEN	35 NORRE SOGADE, PO BOX 2148, DK-1016 COPENHAGEN, DENMARK	0001-6314	DEC	1991
441	Giovannelli, F; Borgheresi, A; Balestrieri, F; Zaccara, G; Viggiano, MP; Cincotta, M; Ziemann, U	Modulation of interhemispheric inhibition by volitional motor activity: an ipsilateral silent period study	Brief interruption of voluntary EMG in a hand muscle by focal transcranial magnetic stimulation (TMS) of the ipsilateral primary motor cortex (M1), the so-called ipsilateral silent period (ISP), is a measure of interhemispheric motor inhibition. However, little is known about how volitional motor activity would modulate the ISP. Here we tested in 30 healthy adults to what extent and under what co…	N		N	Healthy controls only	N		JOURNAL OF PHYSIOLOGY-LONDON	2009	587	22	5393	5410		10.1113/jphysiol.2009.175885
442	Girbau, D	A neurocognitive approach to the study of private speech	The paper presents the current state of the art of research identifying the neurophysiological and neuroanatomical substrates of private speech, both in typical and clinical (or atypical) populations. First, it briefly describes the evolution of private speech research, which goes from classic traditions as the naturalistic and referential paradigms to the neurocognitive approach. An overview of …	N		N	Irrelevant Review	N		SPANISH JOURNAL OF PSYCHOLOGY	2007	10	1	41	51
443	Goldmann, RE; Golby, AJ	Atypical language representation in epilepsy: Implications for injury-induced reorganization of brain function	This review addresses language function and reorganization associated with various forms of epilepsy. Longstanding epilepsy, particularly types with onset early in life, may be associated with changes in the representation of language function in the brain. As a result of this reorganization, language function may be relatively spared despite injury to areas of the brain that normally sub-serve t…	N		N	Irrelevant Review	N		EPILEPSY & BEHAVIOR	2005	6	4	473	487		10.1016/j.yebeh.2005.03.012
444	Goldschmidt T., Hulst H.E., De Wit S., Van Der Werf Y.D., Van Den Heuvel O.A., Barkhof F., Polman C., Nitsche M.A., Geurts J.J.G.	Repetitive transcranial magnetic stimulation improves working memory and induces changes in brain activity of Multiple Sclerosis patients	Aim: Working memory deficits are highly prevalent in multiple sclerosis (MS). The dorsolateral prefrontal cortex (DLPFC) is a crucial structure for working memory. The aim of the current study was to investigate the effects of excitability-enhancing repetitive Transcranial Magnetic Stimulation (rTMS) in MS patients on working memory (N-back-task performance) and brain activity (functional MRI) to…	Y		N	No EMG	N		Multiple Sclerosis (2013) 19:7 (977). Date of Publication: June 2013							10.1177/1352458513490384
445	Goldschmidt T., Hulst H.E., Pouwels P.J.W., De Wit S., Van Der Werf Y.D., Van Den Heuvel O.A., Barkhof F., Polman C., Nitsche M.A., Geurts J.J.G.	Improvement of working memory in multiple sclerosis patients after a single session of repetitive transcranial magnetic stimulation	Aim: Working memory deficits are highly prevalent in multiple sclerosis (MS). The dorsolateral prefrontal cortex (DLPFC) is a crucial structure for working memory. The aim of this study was to investigate the effects of excitability-enhancing repetitive Transcranial Magnetic Stimulation (rTMS) in MS patients on working memory (N-back task performance), brain activity (functional MRI) and local me…	Y		N	No EMG	N		Multiple Sclerosis (2013) 19:11 SUPPL. 1 (280-281). Date of Publication: October 2013							10.1177/1352458513502429
450	Gomez-Fernandez, L; Minou-Baez, M; Cabrera-Gomez, JA	The sensitivity of motor evoked potentials in detecting cortico-spinal lesions in patients with multiple sclerosis	Introduction. Motor evoked potentials (MEP) are very useful for the evaluation of multiple sclerosis patients. Objective. To know the sensibility of MEP in a group of patients with diagnosis of multiple sclerosis, Patients and methods. A transversal and descriptive study was done in 56 patients with definite multiple sclerosis (MS). MEP using magnetic stimulation were carried out in all of them, …	N		N	No healthy control group	N		REVISTA DE NEUROLOGIA			BARCELONA	C/O CESAR VIGUERA, EDITOR, APDO 94121, 08080 BARCELONA, SPAIN	0210-0010	FEB 16	1999
451	González M.M., Salas-Pacheco J.M., Arias-Carrión O.	The yearly rate of Relative Thalamic Atrophy (yrRTA): A simple 2D/3D method for estimating deep gray matter atrophy in Multiple Sclerosis	Despite a strong correlation to outcome, the measurement of gray matter (GM) atrophy is not being used in daily clinical practice as a prognostic factor and monitor the effect of treatments in Multiple Sclerosis (MS). This is mainly because the volumetric methods available to date are sophisticated and difficult to implement for routine use in most hospitals. In addition, the meaning of raw resul…	N		N	No TMS	N		Frontiers in Aging Neuroscience (2014) 6:AUG Article Number: 219. Date of Publication: 2014							10.3389/fnagi.2014.00219
452	Gooijers, J; Swinnen, SP	Interactions between brain structure and behavior: The corpus callosum and bimanual coordination	Bimanual coordination skills are required for countless everyday activities, such as typing, preparing food, and driving. The corpus callosum (CC) is the major collection of white matter bundles connecting both hemispheres that enables the coordination between the two sides of the body. Principal evidence for this brain-behavior relationship in humans was first provided by research on callosotomy…	N		N	Irrelevant Review	N		NEUROSCIENCE AND BIOBEHAVIORAL REVIEWS	2014	43		1	19		10.1016/j.neubiorev.2014.03.008
453	Gorsler, A; Baumer, T; Weiller, C; Munchau, A; Liepert, J	Interhemispheric effects of high and low frequency rTMS in healthy humans	Objective: We investigated whether repetitive transcranial magnetic stimulation (rTMS) applied to the right motor cortex modified the excitability of the unstimulated left motor cortex. Methods: Interhemispheric effects of 0.5 and 5 Hz subthreshold rTMS over the right motor cortex were examined by single pulse and paired pulse TMS and by transcranial electrical stimulation (TES) applied to the un…	N		N	Healthy controls only	N		CLINICAL NEUROPHYSIOLOGY	2003	114	10	1800	1807		10.1016/S1388-2457(03)00157-3
454	Gorsler, A; Zittel, S; Weiller, C; Munchau, A; Liepert, J	Modulation of motor cortex excitability induced by pinch grip repetition	We examined the influence of right handed pinch grips and the effect of a motor training on motor cortex excitability of the left first dorsal interosseus muscle (FDI). TMS single and paired pulses were applied over the right human motor cortex (M1) during and after right handed pinch grips with low force. In another experiment, these stimulations were performed before and after a 30-minute right…	N		N	Healthy controls only	N		JOURNAL OF NEURAL TRANSMISSION	2004	111	8	1005	1016		10.1007/s00702-004-0139-6
455	Granziera, C; DaSilva, AFM; Snyder, J; Tuch, DS; Hadjikhani, N	Anatomical alterations of the visual motion processing network in migraine with and without aura	Background Patients suffering from migraine with aura (MWA) and migraine without aura (MWoA) show abnormalities in visual motion perception during and between attacks. Whether this represents the consequences of structural changes in motion-processing networks in migraineurs is unknown. Moreover, the diagnosis of migraine relies on patient's history, and finding differences in the brain of migrai…	N		N	Migraine	N		PLOS MEDICINE	2006	3	10	1915	1921	e402	10.1371/journal.pmed.0030402
456	Gray W.A., Sabatier M.J., Kesar T.M., Borich M.R.	Establishing between-session reliability of TMS-conditioned soleus H-reflexes	Transcranial magnetic stimulation (TMS) of the primary motor cortex (M1) can be used to evaluate descending corticomotor influences on spinal reflex excitability through modulation of the Hoffman reflex (H-reflex). The purpose of this study was to characterize between-session reliability of cortical, spinal, and cortical-conditioned spinal excitability measures collected from the soleus muscle. T…	N		N	Healthy controls only	N		Neuroscience Letters (2017) 640 (47-52). Date of Publication: 15 Feb 2017							10.1016/j.neulet.2017.01.032
457	Groppa S., Oliviero A., Eisen A., Quartarone A., Cohen L.G., Mall V., Kaelin-Lang A., Mima T., Rossi S., Thickbroom G.W., Rossini P.M., Ziemann U., Valls-Solé J., Siebner H.R.	A practical guide to diagnostic transcranial magnetic stimulation: Report of an IFCN committee	Transcranial magnetic stimulation (TMS) is an established neurophysiological tool to examine the integrity of the fast-conducting corticomotor pathways in a wide range of diseases associated with motor dysfunction. This includes but is not limited to patients with multiple sclerosis, amyotrophic lateral sclerosis, stroke, movement disorders, disorders affecting the spinal cord, facial and other c…	N		R		R		Clinical Neurophysiology (2012) 123:5 (858-882). Date of Publication: May 2012							10.1016/j.clinph.2012.01.010
460	Guarnaccia J.B.	Daptomycin therapy for multiple sclerosis: clinical observations	Background: Treatment for progressive forms of multiple sclerosis (MS) remains a signifcant clinical challenge despite currently available therapies. Objectives: Unexpected improvement in a 53 year old woman with secondary-progressive multiple sclerosis (SPMS) after treatment with daptomycin, a novel cyclic lipopeptide antibiotic, prompted its use in other patients with progressive or relapsing M…	N		N	No TMS	N		Multiple Sclerosis (2010) 16:8 (1002-1003). Date of Publication: August 2010							10.1177/13524585100160081302
461	Guerit J.-M.	How can clinical neurophysiology help in studying fatigue?		U		N		N		Neurophysiologie Clinique (2017) 47:2 (85-86). Date of Publication: 1 Apr 2017							10.1016/j.neucli.2017.03.004
462	Guerriero F., Ricevuti G.	Extremely low frequency electromagnetic fields stimulation modulates autoimmunity and immune responses: A possible immuno-modulatory therapeutic effect in neurodegenerative diseases	Increasing evidence shows that extremely low frequency electromagnetic fields (ELF-EMFs) stimulation is able to exert a certain action on autoimmunity and immune cells. In the past, the efficacy of pulsed ELF-EMFs in alleviating the symptoms and the progression of multiple sclerosis has been supported through their action on neurotransmission and on the autoimmune mechanisms responsible for demye…	N		N	No TMS	N		Neural Regeneration Research (2016) 11:12 (1888-1895). Date of Publication: 1 Dec 2016							10.4103/1673-5374.195277
464	Gueugneau, N; Bove, M; Ballay, Y; Papaxanthis, C	Interhemispheric inhibition is dynamically regulated during action observation	It is now well established that the motor system plays a pivotal role in action observation and that the neurophysiological processes underlying perception and action overlaps. However, while various experiments have shown a specific facilitation of the contralateral motor cortex during action observation, no information is available concerning the dynamics of interhemispheric interactions. The a…	N		N	Healthy controls only	N		CORTEX	2016	78		138	149		10.1016/j.cortex.2016.03.003
465	Gullmar, D; Haueisen, J; Reichenbach, JR	Influence of anisotropic electrical conductivity in white matter tissue on the EEG/MEG forward and inverse solution. A high-resolution whole head simulation study	To investigate the influence of anisotropic electrical conductivity in white matter on the forward and inverse solution in electroencephalography (EEG) and magnetoencephalography (MEG) numerical simulation studies were performed. A high-resolution (1 mm(3) isotropic) finite element model of a human head was implemented to study the sensitivity of EEG and MEG source localization. In vivo informati…	N		N	Simulation	N		NEUROIMAGE	2010	51	1	145	163		10.1016/j.neuroimage.2010.02.014
466	Gunduz A., Kumru H., Pascual-Leone A.	Outcomes in spasticity after repetitive transcranial magnetic and transcranial direct current stimulations	Non-invasive brain stimulations mainly consist of repetitive transcranial magnetic stimulation and transcranial direct current stimulation. Repetitive transcranial magnetic stimulation exhibits satisfactory outcomes in improving multiple sclerosis, stroke, spinal cord injury and cerebral palsy-induced spasticity. By contrast, transcranial direct current stimulation has only been studied in post-s…	N		N		N		Neural Regeneration Research (2014) 9:7 (712-718). Date of Publication: 5 Apr 2014							10.4103/1673-5374.131574
468	Hageman G., Eertman-Meyer C.J., Tel-Hampsink J.	Clinical diagnostic value of examination with magnetic stimulation		N		N		N		Nederlands Tijdschrift voor Geneeskunde (1993) 137:45 (2323-2328). Date of Publication: 1993
470	HAGHIGHI, SS; PEREZESPEJO, MA; ORO, JJ; ADELSTEIN, EH; CHOI, HJ	ORIGIN OF MUSCLE ACTION POTENT EVOKED BY TRANSCRANIAL MAGNETIC STIMULATION IN CATS	We studied the effects of transcranial magnetic stimulation on ipsilateral and contralateral forelimb extensor muscles in anesthetized cats. A magnetic stimulator, operating at 100% intensity, was used through a circular coil, which was placed tangentially over the midline scalp. Bilateral activation of extensor muscles was readily obtained in all animals. The onset latencies were 7.3+/-1.1 and 7…	N		N	Animal model	N		NEUROLOGICAL RESEARCH			LONDON	MONOMARK HOUSE 27 OLD GLOUCESTER STREET, LONDON, ENGLAND WC1N 3XX	0161-6412	DEC	1995
471	Haghighi, SS; York, DH; Spollen, L; Oro, JJ; PerezEspejo, MA	Neurophysiological evidence of spared upper motor neurons after spinal cord injury	Fourteen cats were subjected to a moderate (100 gm-cm; n=7) or a severe (600 gm-cm; n=7) spinal cord injury at the C4-C5 level using a weight drop technique. Somatosensory evoked potentials (SSEPs) were recorded after stimulation of the median nerve in the forearm. The SSEPs were measured in each animal before and after the injury. Motor evoked potentials (MEPs) were recorded from forearm extenso…	N		N	Animal model	N		PARAPLEGIA			BASINGSTOKE	HOUNDMILLS, BASINGSTOKE, HAMPSHIRE, ENGLAND RG21 6XS	0031-1758	JAN	1996
472	Hagiwara, K; Okamoto, T; Shigeto, H; Ogata, K; Somehara, Y; Matsushita, T; Kira, JI; Tobimatsu, S	Oscillatory gamma synchronization binds the primary and secondary somatosensory areas in humans	Induced gamma activity has a key role in the temporal binding of distributed cortico-cortical processing. To elucidate the neural synchronization in the early-stage somatosensory processing, we studied the functional connectivity between the primary and secondary somatosensory cortices (SI and 511) in healthy subjects using magnetoencephalography (MEG) with excellent spatiotemporal resolution. Fi…	N		N	No TMS	N		NEUROIMAGE	2010	51	1	412	420		10.1016/j.neuroimage.2010.02.001
473	Hallett M.	Transcranial magnetic stimulation: A revolution in clinical neurophysiology		N		N		N		Journal of Clinical Neurophysiology (2002) 19:4 (253-254). Date of Publication: 2002
475	HALLETT, M; BERARDELLI, A; DELWAIDE, P; FREUND, HJ; KIMURA, J; LUCKING, C; ROTHWELL, JC; SHAHANI, BT; YANAGISAWA, N	CENTRAL EMG AND TESTS OF MOTOR CONTROL - REPORT OF AN IFCN COMMITTEE		N		N	Irrelevant Review	N		ELECTROENCEPHALOGRAPHY AND CLINICAL NEUROPHYSIOLOGY			CLARE	CUSTOMER RELATIONS MANAGER, BAY 15, SHANNON INDUSTRIAL ESTATE CO, CLARE, IRELAND	0013-4694	JUN	1994
476	Hammond F., Alexander D.N., Cutler A.J., D'Amico S., Doody R.S., Sauve W., Zorowitz R.D., Davis C.S., Shin P., Ledon F., Yonan C., Formella A.E., Siffert J.	An open-label study to assess safety, tolerability, and effectiveness of dextromethorphan/quinidine for pseudobulbar affect (PBA) in dementia, stroke and traumatic brain injury: Prism ii combined cohort results for patients aged ≥65 years	Introduction: Pseudobulbar affect (PBA) is a neurologic condition characterized by laughing and crying episodes that are uncontrollable, disruptive, and generally incongruent with social context and prevailing mood. PBA can occur secondary to a variety of unrelated neurologic conditions such as traumatic brain injury (TBI), stroke and Alzheimer's disease. It is estimated that approximately 9% of …	N		N	No TMS	N		American Journal of Geriatric Psychiatry (2016) 24:3 Supplement 1 (S146-S147). Date of Publication: 1 Mar 2016
477	Hammond F.M., Alexander D.N., Cutler A.J., D'Amico S., Doody R.S., Sauve W., Zorowitz R.D., Davis C.S., Shin P., Ledon F., Yonan C., Formella A.E., Siffert J.	PRISM II: An open-label study to assess effectiveness of dextromethorphan/quinidine for pseudobulbar affect in patients with dementia, stroke or traumatic brain injury	Background: Phase 3 trials supporting dextromethorphan/quinidine (DM/Q) use as a treatment for pseudobulbar affect (PBA) were conducted in patients with amyotrophic lateral sclerosis (ALS) or multiple sclerosis (MS). The PRISM II study provides additional DM/Q experience with PBA secondary to dementia, stroke, or traumatic brain injury (TBI). Methods: Participants in this open-label, multicenter,…	N		N	TBI	N		BMC Neurology (2016) 16:1 Article Number: 89. Date of Publication: 9 Jun 2016							10.1186/s12883-016-0609-0
479	Han, L; Wang, S; Ma, JQ; Yao, WP; Shen, Y; Shi, XM	The Effects of Electro-acupuncturing DU26 (Renzhong) on Motor Cortical Excitability and Neurofunction After Focal Cerebral Ischemia Injury in Rats	Objective: To study the effects of electro-acupuncturing DU26 (Renzhong) on cortical excitability and neurofunction after focal cerebral ischemia injury. Method: 30 male Wistar rats were divided randomly into control group, MCAo group and MCAo+DU26ES group, 10 in each group. Middle Cerebral Artery occlusion models (MCAo) were created in accordance with Zea Longa method and modified method. DC con…	N		N	Animal model	N		ACUPUNCTURE & ELECTRO-THERAPEUTICS RESEARCH	2010	35	1-2	29	44
480	Harris-Love M., Cohen L.G.	High level bilateral talks. Focus on "effect of low-frequency repetitive transcranial magnetic stimulation on interhemispheric inhibition"		N		N	Irrelevant Review	N		Journal of Neurophysiology (2005) 94:3 (1664-1665). Date of Publication: September 2005							10.1152/jn.00450.2005
483	Hasan, MM; Abu Sufian, SM; Mehdi, H; Siddique-e-Rabbani, K	Designing a Transcranial Magnetic Stimulator Coil for Deep Brain Stimulation	Human brain is a very complex organ and may suffer from various diseases and disorders. Therefore, techniques are required to diagnose the disorders and provide necessary treatment. Electrical or magnetic deep brain stimulation has been successfully used for both these purposes. This research develops a type of therapy that uses stimulation to treat neurological disorders, diseases of the central…	N		N	Methods	N		2016 9TH INTERNATIONAL CONFERENCE ON ELECTRICAL AND COMPUTER ENGINEERING (ICECE)	2016			303	306
484	Hashimoto R., Kanho M., Fujimoto K., Tanaka Y.	Left hand clumsiness due to disturbance of kinesthesia after damage to the dorsal column of the high cervical cord	We described a 48-year-old, right-handed woman who manifested left hand clumsiness after damage to the dorsal column of the high cervical cord due to probable multiple sclerosis. On February 29, 1996, she developed a weakness in the right limbs. Subsequently, she suffered numbness and clumsiness in the left limbs, even though muscle strength of the left limbs was preserved. Seventeen days later, …	N		N	No TMS	N		Clinical Neurology (1997) 37:4 (319-325). Date of Publication: April 1997
486	Hashimoto T., Uozumi T., Tsuji S.	Paraspinal motor evoked potentials by magnetic stimulation of the motor cortex	The authors studied five patients with MS and four patients with HTLV-1 associated myelopathy (HAM) to investigate the useful-ness of paraspinal motor evoked potentials (MEP) after magnetic stimulation of the motor cortex. In patients with MS, MEP disappeared or onset latencies were delayed below the lesion. In patients with HAM, the onset latencies were prolonged bilaterally. Thus, paraspinal ME…	N		N	No healthy control group	N		Neurology (2000) 55:6 (885-888). Date of Publication: 26 Sep 2000
488	Hashimoto, T; Kashii, S; Kikuchi, M; Honda, Y; Nagamine, T; Shibasaki, H	Temporal profile of visual evoked responses to pattern-reversal stimulation analyzed with a whole-head magnetometer	Magnetoencephalography (MEG) has become accepted as a useful method for non-invasively studying brain functions, including visual perception. The present study used MEG to elucidate information processing following pattern-reversal stimulation by analyzing the ori gins and properties of visual evoked magnetic fields (VEFs). The VEFs of ten healthy adults were recorded in a magnetically shielded r…	N		N	No TMS	N		EXPERIMENTAL BRAIN RESEARCH			NEW YORK	175 FIFTH AVE, NEW YORK, NY 10010 USA	0014-4819	APR	1999
489	Haug B.A., Kukowski B.	Latency and duration of the muscle silent period following transcranial magnetic stimulation in multiple sclerosis, cerebral ischemia, and other upper motoneuron lesions	In muscles with sustained voluntary contraction, EMG activity is transiently inhibited after transcranial magnetic stimulation. We recorded this postexcitatory silent period (SP) at 1.5 times individual stimulus threshold level from the first dorsal interosseus muscle in 65 neurologic patients aged 11 to 80 years. When compared with 20 healthy volunteers and a subgroup of patients with peripheral…	N	not defined group of MS	N	Mixed sample of neurological disorders	N	Mixed sample of neurological disorders	Neurology (1994) 44:5 (936-940). Date of Publication: May 1994
494	Haupts, MR; Daum, S; Ahle, G; Holinka, B; Gehlen, W	Transcranial magnetic stimulation as a provocation for epileptic seizures in multiple sclerosis	Epileptic seizures may be of a provoked origin in acute phases of multiple sclerosis (MS), while chronic epilepsy typically occurs in advanced stages of the disease. A case of seizure provocation during diagnostic transcranial magnetic stimulation (TMS) is described here with a corresponding central nervous system (CNS) lesion in cranial magnetic resonance imaging. A subsequent chronic epileptoge…	N		N	Epilepsy	N		MULTIPLE SCLEROSIS	2004	10	4	475	476		10.1191/1352458504ms1062cr
495	HAYES, KC; ALLATT, RD; WOLFE, DL; KASAI, T; HSIEH, J	REINFORCEMENT OF MOTOR EVOKED-POTENTIALS IN PATIENTS WITH SPINAL-CORD INJURY	Transcranial magnetic stimulation of the motor cortex has been used to investigate the putative existence of spared motor pathways in spinal cord injured patients with clinically complete paralysis. Particular consideration was given to methods of neurological reinforcement likely to minimize the risk of false negative interpretation of absent motor evoked potentials (MEPs). The principal methods…	N		N	Spinal cord injury	N		ELECTROENCEPHALOGRAPHY AND CLINICAL NEUROPHYSIOLOGY			CLARE	CUSTOMER RELATIONS MANAGER, BAY 15, SHANNON INDUSTRIAL ESTATE CO, CLARE, IRELAND	0013-4694		1991
496	HAYES, KC; POTTER, PJ; WOLFE, DL; HSIEH, JTC; DELANEY, GA; BLIGHT, AR	4-AMINOPYRIDINE-SENSITIVE NEUROLOGIC DEFICITS IN PATIENTS WITH SPINAL-CORD INJURY	4-Aminopyridine (4-AP) is a potassium channel blocking agent with the ability to restore conduction in demyelinated internodes of axons of the spinal cord. The present investigation sought to obtain electrophysiologic evidence of the effect of 4-AP in ameliorating central conduction deficits in a group of patients (n = 6) with spinal cord injury (SCI). The group was selected on the basis of havin…	N		N	Spinal cord injury	N		JOURNAL OF NEUROTRAUMA			LARCHMONT	2 MADISON AVENUE, LARCHMONT, NY 10538	0897-7151	AUG	1994
497	HAYES, KC; WOLFE, DL	CENTRAL CONDUCTION STUDIES IN PATIENTS WITH SPINAL-CORD INJURY AND OTHER FORMS OF MYELOPATHY	Central conduction studies allow objective determination of the integrity and functional properties of corticospinal tracts compromised by trauma or other forms of myelopathy. This review briefly describes some of the neurological reinforcement techniques that may be employed to maximize the probability of detecting preserved corticospinal innervation to interneurons or motoneuron pools in myelop…	N		N	Irrelevant Review	N		JOURNAL OF ELECTROMYOGRAPHY AND KINESIOLOGY			OXFORD	LINACRE HOUSE JORDAN HILL, OXFORD, OXON, ENGLAND OX2 8DP	1050-6411	SEP	1995
498	Henkin R.I., Potolicchio S.J., Levy L.M., Moharram R., Velicu I., Martin B.M.	Carbonic anhydrase I, II, and VI, blood plasma, erythrocyte and saliva zinc and copper increase after repetitive transcranial magnetic stimulation	Introduction: Repetitive transcranial magnetic stimulation (rTMS) has been used to treat symptoms from many disorders; biochemical changes occurred with this treatment. Preliminary studies with rTMS in patients with taste and smell dysfunction improved sensory function and increased salivary carbonic anhydrase (CA) VI and erythrocyte CA I, II. To obtain more information about these changes after …	N		N	Taste and Smell Dysfunction	N		American Journal of the Medical Sciences (2010) 339:3 (249-257). Date of Publication: March 2010							10.1097/MAJ.0b013e3181cda0e3
501	HERDMANN, J; DVORAK, J; VOHANKA, S	NEUROPHYSIOLOGICAL EVALUATION OF DISORDERS AND PROCEDURES AFFECTING THE SPINAL-CORD AND THE CAUDA-EQUINA	Neurophysiological tests that asses afferent or efferent pathways of the spinal cord and of nerve roots are used for clinical diagnosis, intraoperative monitoring, and judgement of prognosis. Most tests can readily be performed in awake subjects, whereas many difficulties arise in anesthetized patients in whom neurophysiological testing is the only way of monitoring functional integrity of neural…	N		N	Irrelevant Review	N		CURRENT OPINION IN NEUROLOGY AND NEUROSURGERY			LONDON	34-42 CLEVELAND STREET, LONDON, ENGLAND W1P 6LB	0951-7383	AUG	1992	22	2
502	Hess C.W., Mills K.R., Murray N.M.F., Schriefer T.N.	Magnetic brain stimulation:central motor conduction studies in multiple sclerosis	Central motor conduction (CMC) was evaluated in 32 normal subjects and 83 patients with multiple sclerosis, and the findings were correlated with clinical signs and evoked potential data. CMC time was obtained from the latency difference in responses from the abductor muscle of the little finger to magnetic stimulation of the motor cortex and electrical stimulation at the C-7/T-1 interspace. Mean…	N	clinical data? No EDSS	N	No clinical measures	N	No EDSS	Annals of Neurology (1987) 22:6 (744-752). Date of Publication: 1987							10.1002/ana.410220611	7	1
504	HESS, CW; MILLS, KR; MURRAY, NMF	MAGNETIC BRAIN-STIMULATION CAN DEMONSTRATE SUBCLINICAL LESIONS OF CENTRAL MOTOR PATHWAYS IN MULTIPLE-SCLEROSIS		U	Not there	U	Unable to find online	N	Cannot obtain article	ELECTROENCEPHALOGRAPHY AND CLINICAL NEUROPHYSIOLOGY			CLARE	CUSTOMER RELATIONS MANAGER, BAY 15, SHANNON INDUSTRIAL ESTATE CO, CLARE, IRELAND	0013-4694	JAN	1988	122
505	HESS, CW; MILLS, KR; MURRAY, NMF	EXTREME PROLONGATION OF CENTRAL MOTOR CONDUCTION IN MULTIPLE-SCLEROSIS - A MAGNETIC STIMULATION STUDY		U	Not there	U	Unable to find online	N	Cannot obtain article	ELECTROENCEPHALOGRAPHY AND CLINICAL NEUROPHYSIOLOGY			CLARE	CUSTOMER RELATIONS MANAGER, BAY 15, SHANNON INDUSTRIAL ESTATE CO, CLARE, IRELAND	0013-4694	JAN	1987	5	4
506	HESS, CW; MILLS, KR; MURRAY, NMF	CENTRAL MOTOR CONDUCTION IN MULTIPLE-SCLEROSIS USING MAGNETIC BRAIN-STIMULATION		U	Not there	U	Unable to find online	N	Cannot obtain article	INTERNATIONAL JOURNAL OF NEUROSCIENCE			READING	C/O STBS LTD PO BOX 90, READING, BERKS, ENGLAND RG1 8JL	0020-7454		1987	834	1-2
507	HESS, CW; MILLS, KR; MURRAY, NMF	MEASUREMENT OF CENTRAL MOTOR CONDUCTION IN MULTIPLE-SCLEROSIS BY MAGNETIC BRAIN-STIMULATION	Central motor conduction time (CMCT) to abductor digiti minimi was measured in 18 healthy subjects and in 15 patients with multiple sclerosis. A novel percutaneous magnetic stimulator was used to stimulate the motor cortex painlessly and CMCT was calculated by subtracting the onset latency of muscle responses obtained by electrical stimulation over the C7/T1 interspace from that obtained from sti…	N	lab-supported probable MS, and suspected MS?	N	No clinical measures	N	No clinical measures	LANCET			LONDON	42 BEDFORD SQUARE, LONDON, ENGLAND WC1B 3SL	0140-6736	AUG 16	1986	110	7
509	Hirabayashi H., Kawata K., Hoshida T., Tamura K., Youngsu P., Nakase H.	Neuromodulation therapy for neuropathic pain	It is important and yet bothersome for physicians to treat neuropathic pain. Neuropathic pain can be caused by a number of different diseases (e. g., diabetes mellitus, herpes zoster, brachial plexus avulsion, complex regional pain syndrome (CRPS), failed back surgery syndrome (FBSS), spinal cord injury, post stroke central pain (CPSP), and multiple sclerosis). There are many medicines for neurop…	N		N	Irrelevant Review	N		Japanese Journal of Neurosurgery (2011) 20:2 (93-102). Date of Publication: February 2011								110	6
510	Hitomi, T; Mezaki, T; Tsujii, T; Kinoshita, M; Tomimoto, H; Ikeda, A; Shimohama, S; Okazaki, T; Uchiyama, T; Shibasaki, H	Improvement of central motor conduction after bone marrow transplantation in adrenoleukodystrophy	The case is described of a 20 year old man with adrenoleukodystrophy who showed right spastic hemiparesis and gait disturbance. Brain magnetic resonance imaging disclosed predominant involvement of the left corticospinal pathway. The clinical symptoms improved after bone marrow transplantation. Transcranial magnetic stimulation disclosed significant improvement in various parameters of central mo…	N		N	Adrenoleukodystrophy	N		JOURNAL OF NEUROLOGY NEUROSURGERY AND PSYCHIATRY	2003	74	3	373	375		10.1136/jnnp.74.3.373	5	3
511	Ho K.-H., Lee M., Nithi K., Palace J., Mills K.	Changes in motor evoked potentials to short-interval paired transcranial magnetic stimuli in multiple sclerosis	Objective: Paired transcranial magnetic stimuli (TMS) were applied in 8 multiple sclerosis (MS) patients with asymmetrical clinical signs and in 8 healthy controls to test the hypothesis that the circuits responsible for the generation and transmission of I-waves are abnormal in the former group Methods: A figure-of-8 coil discharging through a Magstim 200/Bistim configuration delivered identical…	Y		Y		Y		Clinical Neurophysiology (1999) 110:4 (712-719). Date of Publication: 1 Apr 1999							10.1016/S1388-2457(98)00048-0	110	5
515	Hodaie M., Coello A.F.	Advances in the management of trigeminal neuralgia	Trigeminal neuralgia (TN), one of the most intense forms of facial pain, has been the subject of great clinical interest. Significant advances have been made in its management, including surgical treatment and imaging of the trigeminal nerve and associated neurovascular compression. The different options for surgical treatment, recent advances in each as well as novel methods of imaging of the tr…	N		N	Irrelevant Review	N		Journal of Neurosurgical Sciences (2013) 57:1 (13-21). Date of Publication: March 2013								109	3	290FH	WOS:000085665300008	10738920	No			42986
516	Hoffmann M.	The human frontal lobes and frontal network systems: An evolutionary, clinical, and treatment perspective	Frontal lobe syndromes, better termed as frontal network systems, are relatively unique in that they may manifest from almost any brain region, due to their widespread connectivity. The understandings of the manifold expressions seen clinically are helped by considering evolutionary origins, the contribution of the state-dependent ascending monoaminergic neurotransmitter systems, and cerebral con…	N		N	Irrelevant Review	N		ISRN Neurology (2013) 1:1 Article Number: 892459. Date of Publication: 2013							10.1155/2013/892459	28	4	300QD	WOS:000086262900010	10809916	No			42986
517	Hofstadt-Van Oy U., Keune P., Menge U., Oschmann P.	Motor conduction, walking ability and cognitive function in patients with clinical isolated syndromes and remitting relapsing multiple sclerosis: A one year follow-up study after initiation of a disease modifying therapy	Objective: To study different domains of motor and cognitive function in mildly disabled patients with clinical isolated syndromes (CIS) and relapsing remitting multiple sclerosis (RR-MS) before initiation of a disease modifying therapy (DMT) and after three and twelve months. Methods: 21 patients with RR-MS and 16 patients with CIS, all in a stable condition for at least 4 weeks with an Expanded…	N		N	No healthy control group	N		Multiple Sclerosis (2013) 19:11 SUPPL. 1 (244). Date of Publication: October 2013							10.1177/1352458513502429	122		230PN	WOS:000082259700012	10430838	No			42986
518	Hofstadt-van Oy U., Keune P.M., Muenssinger J., Hagenburger D., Oschmann P.	Normative data and long-term test-retest reliability of the triple stimulation technique (TST) in multiple sclerosis	Objectives: Transcranial magnetic stimulation is useful for the assessment of cortico-spinal tract integrity in multiple sclerosis (MS). An advanced approach is the triple stimulation technique (TST), utilizing a combination of central and peripheral stimuli, reducing individual response variability. Although TST measures have been implemented in longitudinal studies, basic methodological data on…	N	Clinically isolated syndrome	N	Clinically isolated syndrome	N	Clinically isolated syndrome	Clinical Neurophysiology (2015) 126:2 (356-364). Date of Publication: 1 Feb 2015							10.1016/j.clinph.2014.05.032	28	3	226KP	WOS:000082019400012	10467386	No			42986
520	Hofstadt-Van Oy U., Klawe C., Hagenburger D., Menge U., Oschmann P., Ziemann U.	Central motor conduction failure examined with the triple stimulation technique correlates with pyramidal tract dysfunction and disability in patients with multiple sclerosis	Objective: Assessment of the triple stimulation technique (TST) as a surrogate parameter of disability in multiple sclerosis (MS). Background: Inflammatory lesions and axonal degeneration of the corticospinal tract result in gait disturbance and increasing disability in patients with MS. Conventional single-pulse transcranial magnetic stimulation is insensitive in detecting axonal damage or condu…	N	Poster session	N	Conference	N	Conference	Journal of Neurology (2011) 258 SUPPL. 1 (S157). Date of Publication: May 2011							10.1007/s00415-011-6026-9	141	8	219PT	WOS:000081616200009	10407095	No			42986
521	Hofstadt-Van Oy U., Klawe C., Hagenburger D., Weiss-Köhler A., Menge U., Strotzer M., Lieser S., Oschmann P., Rösler K.	Triple stimulation in patients with clinical isolated syndromes. Sensitivity to detect clinically silent lesions in comparison to transcranial magnetic stimulation and visual/somatosensory evoked potentials	Objective: To compare the sensitivity of the triplestimulation technique (TST), visual (VEP) and somatosensory (SEP) evoked potentials and transcranial magnetic stimulation (TMS) to detect conduction failure in patients with “clinical isolated syndromes” (CIS). Background: Patients with CIS like optic neuritis, myelitis or cerebral inflammatory disease are at high risk to develop multiple scleros…	N		N	Clinically isolated syndrome	N		Journal of Neurology (2011) 258 SUPPL. 1 (S156-S157). Date of Publication: May 2011							10.1007/s00415-011-6026-9			212LX	WOS:000081219100015	10423196	No			42986
522	Hofstadt-van Oy U., Menge U., Burschka J., Oschmann P.	Motor fatigue correlates with cognitive fatigue and depression but not with central motor conduction failure and walking speed in mildly disabled patients with clinical isolated syndromes and multiple sclerosis	Objective: To study different domains of motor and cognitive fatigue in mildly disabled patients with clinical isolated syndromes (CIS) and relapsing remitting multiple sclerosis (RR-MS) with self-reports by the patient and objective methods to record the decline of motor and cognitive performances over time, and to study correlations of motor fatigue with central motor conduction failure detecte…	N		Y		N	NO HC	Journal of Neurology (2012) 259:1 SUPPL. 1 (S192). Date of Publication: June 2012							10.1007/s00415-012-6524-4		49	209AM	WOS:000081024900014	10402100	No			42986
523	Hofstadt-van Oy U., Menge U., Weiss-Köhler A., Strotzer M., Lieser S., Oschmann P.	Clinical isolated syndromes: Sensitivity to detect clinically silent lesions with the triple stimulation technique in comparison to transcranial magnetic stimulation and visual/somatosensory evoked potentials	OBJECTIVE: To compare the sensitivity of the triplestimulation technique (TST), visual (VEP) and somatosensory (SEP) evoked potentials and transcranial magnetic stimulation (TMS) and to detect conduction failure in patients with “clinical isolated syndromes” (CIS). BACKGROUND: Patients with CIS like optic neuritis, myelitis or cerebral inflammatory disease are at high risk to develop multiple scl…	N		N	Clinically isolated syndrome	N		Neurology (2013) 80:1 MeetingAbstracts. Date of Publication: 12 Feb 2013								72	2-4	203BT	WOS:000080688000004	10408715	No			42986
524	Hofstadt-van Oy U., Weiß-Köhler A., Klawe C., Hagenburger D., Strotzer M., Lieser S., Oschmann P.	Motor-conduction failure in clinical isolated syndromes: Sensitivity to detect clinically silent lesions with transcranial magnetic stimulation and the triple-stimulation technique	Objective: To compare the sensitivity to detect motor-conduction failure in patients with “clinical isolated syndromes” (CIS) with transcranial magnetic stimulation (TMS) and the triplestimulation technique (TST) and to describe their pathophysiology. Background: Patients with CIS like optic neuritis, myelitis, brainstem or cerebral inflammatory disease are at high risk to develop multiple sclero…	N		N	Clinically isolated syndrome	N		Klinische Neurophysiologie (2011) 42:1. Date of Publication: March 2011							10.1055/s-0031-1272707		51	206NM	WOS:000080886000023	10400213	No			42986
526	Holets Y., Likhachev S.	Repetitive transcranial magnetic stimulation for vestibular symptoms treatment in multiple sclerosis patients	Background: Cerebellar and brainstem symptoms are typical for multiple sclerosis (MS). Nystagmus is more common among them. Objective: To estimate repetitive transcranial magnetic stimulation (rTMS) efficiency in vestibular symptoms treatment in MS patients. Methods: Main group consists of two subgroups «Exacerbation» and «Progression» each 10 patients. All patients received methylprednisolone or…	N		N	No upper- or lower-limb EMG	N		European Journal of Neurology (2009) 16:S3 (256). Date of Publication: 2009							10.1111/j.1468-1331.2009.02821.x	109	4	174LP	WOS:000079036900028	10089982	No			42986
528	Holets, Y; Likhachev, S; Kachinsky, A	Repetitive transcranial magnetic stimulation for ataxia treatment in multiple sclerosis patients		N	Poster session	N	Conference	N	Conference	EUROPEAN JOURNAL OF NEUROLOGY	2008	15		362	363			159	1	174XT	WOS:000079062300004	10714312	No			42986
529	HOMBERG, V; STEPHAN, KM; NETZ, J	TRANSCRANIAL STIMULATION OF MOTOR CORTEX IN UPPER MOTOR-NEURON SYNDROME - ITS RELATION TO THE MOTOR DEFICIT	The purpose of this investigation was to clarify the functional significance of the fastest cortico-motoneuronal connections in chronic upper motor neurone syndromes. Using magnetoelectrical stimulation of motor cortex the intactness of cortico-motoneuronal connections was assessed in 51 patients presenting with variable degrees of impairment. There was a gross correlation between clinical impair…	N		N	No healthy control group	N		ELECTROENCEPHALOGRAPHY AND CLINICAL NEUROPHYSIOLOGY			CLARE	CUSTOMER RELATIONS MANAGER, BAY 15, SHANNON INDUSTRIAL ESTATE CO, CLARE, IRELAND	0013-4694	OCT	1991	25	4	169PC	WOS:000078756900010	10071055	No			42986
530	Hopia, L; Thangarajh, M; Khademi, M; Laveskog, A; Wallstrom, E; Svenungsson, E; Andersson, M	Cerebrospinal fluid levels of a proliferation-inducing ligand (APRIL) are increased in patients with neuropsychiatric systemic lupus erythematosus	Objectives: A proliferation-inducing ligand (APRIL) and B-cell activation factor (BAFF) are B-cell stimulation and survival molecules. We have investigated whether APRIL and/or BAFF activity is enhanced in the systemic and/or intrathechal compartment of patients with neuropsychiatric systemic lupus erythematosus (NPSLE). In particular, the association between fatigue and APRIL/BAFF activity was i…	N		N	Lupus	N		SCANDINAVIAN JOURNAL OF RHEUMATOLOGY	2011	40	5	363	372		10.3109/03009742.2010.550900	109	3	174XR	WOS:000079062200003	10714282	No			42986
533	Hoppner, J; Kunesch, E; Buchmann, J; Hess, A; Grossmann, A; Benecke, R	Demyelination and axonal degeneration in corpus callosum assessed by analysis of transcallosally mediated inhibition in multiple sclerosis	Objective: Following focal transcranial magnetic cortex stimulation (fTMS), inhibition of voluntary EMG activity in the ipsilateral first dorsal interosseus (FDI) muscle was studied, in order to assess the functional integrity of the corpus callosum in patients with multiple sclerosis (MS). Methods and results: Thirty-four patients suffering from definite MS and 12 healthy, age-matched normal sub…	N	clinical data? No EDSS	N	No clinical measures	N	No EDSS	CLINICAL NEUROPHYSIOLOGY		Hoppner, Jacqueline/B-6389-2015	CLARE	CUSTOMER RELATIONS MANAGER, BAY 15, SHANNON INDUSTRIAL ESTATE CO, CLARE, IRELAND	1388-2457	APR	1999	121		230NP	WOS:000082257500012	10536720	No			42986
535	Houdayer, E; Comi, G; Leocani, L	The neurophysiologist perspective into MS plasticity	Multiple sclerosis (MS) is a frequent, highly debilitating inflammatory demyelinating disease, starting to manifest in early adulthood and presenting a wide variety of symptoms, which are often resistant to pharmacological treatments. Cortical dysfunctions have been demonstrated to be key components of MS condition, and plasticity of the corticospinal motor system is highly involved in major MS s…	N		R		R		FRONTIERS IN NEUROLOGY	2015	6				193	10.3389/fneur.2015.00193	21	5	BP14K	WOS:000084221800055		No			42986
536	Howell, KB; Katanyuwong, K; Mackay, MT; Bailey, CA; Scheffer, IE; Freeman, JL; Berkovic, SF; Harvey, AS	Long-term follow-up of febrile infection-related epilepsy syndrome	Purpose: Febrile infectionrelated epilepsy syndrome (FIRES) is an increasingly recognized epileptic syndrome that presents with multifocal refractory status epilepticus in previously normal children and evolves into a chronic, refractory, focal epilepsy with associated cognitive and behavioral difficulties. Herein we describe the features of the chronic epilepsy and critically review evidence for…	N		N	Febrile infectionrelated epilepsy syndrome	N		EPILEPSIA	2012	53	1	101	110		10.1111/j.1528-1167.2011.03350.x	121		BN66N	WOS:000082549700040		No			42986
537	Hubbard, NA; Araujo, YS; Caballero, C; Ouyang, MH; Turner, MP; Himes, L; Faghihahmadabadi, S; Thomas, BP; Hart, J; Huang, H; Okuda, DT; Rypma, B	Evaluation of Visual-Evoked Cerebral Metabolic Rate of Oxygen as a Diagnostic Marker in Multiple Sclerosis	A multiple sclerosis (MS) diagnosis often relies upon clinical presentation and qualitative analysis of standard, magnetic resonance brain images. However, the accuracy of MS diagnoses can be improved by utilizing advanced brain imaging methods. We assessed the accuracy of a new neuroimaging marker, visual-evoked cerebral metabolic rate of oxygen (veCMRO(2)), in classifying MS patients and closel…	N		N	No TMS	N		BRAIN SCIENCES	2017	7	6			64	10.3390/brainsci7060064	106	3	311RA	WOS:000086897600022	10853078	No			42986
538	Huebers A., Wahl M., Ziemann U.	Interhemispheric motor inhibition as a marker of callosal disconnection in early relapsing-remitting multiple sclerosis	Objective: The corpus callosum (CC) is often and early affected in relapsing-remitting multiple sclerosis (RRMS) but the behavioural consequences may be very subtle. We aimed to study the functional integrity of the motor CC in patients with early RRMS compared to healthy controls. We studied interhemispheric inhibition (IHI) as an electrophysiological marker of effective connectivity between the…	N	oral presentation	N	Conference	N	Conference	Multiple Sclerosis (2010) 16:10 SUPPL. 1 (S9). Date of Publication: October 2010							10.1177/1352458510383204	245	3	BP09N	WOS:000084107600022		No			42986
539	Hug, K; Roosli, M	Therapeutic effects of whole-body devices applying pulsed electromagnetic fields (PEMF): A systematic literature review	Pulsed electromagnetic fields (PEMF) delivered by whole-body mats are promoted in many countries for a wide range of therapeutic applications and for enhanced well-being. However, neither the therapeutic efficacy nor the potential health hazards caused by these mats have been systematically evaluated. We conducted a systematic review of trials investigating the therapeutic effects of low-frequenc…	N		N	Irrelevant Review	N		BIOELECTROMAGNETICS	2012	33	2	95	105		10.1002/bem.20703	25	1	116LA	WOS:000075725100003	9751291	No			42986
540	Hulst H.E., Goldschmidt T., Nitsche M.A., De Wit S.J., Van Den Heuvel O.A., Barkhof F., Paulus W., Van Der Werf Y.D., Geurts J.J.G.	RTMS affects working memory performance, brain activation and functional connectivity in patients with multiple sclerosis	Objective: To investigate the effects of high-frequency repetitive transcranial magnetic stimulation (rTMS) of the right dorsolateral prefrontal cortex (DLPFC) on working memory performance, while measuring task-related brain activation and task-related brain connectivity in patients with multiple sclerosis (MS). Methods: 17 patients with MS and 11 healthy controls (HCs) underwent 3 experimental …	Y		N	No upper- or lower-limb EMG	N		Journal of Neurology, Neurosurgery and Psychiatry (2017) 88:5 (386-394). Date of Publication: 1 May 2017							10.1136/jnnp-2016-314224	28	1	105QE	WOS:000075084500016	9700711	No			42986
543	Humm A.M., Beer S., Kool J., Magistris M.R., Kesselring J., Rösler K.M.	Quantification of Uhthoff's phenomenon in multiple sclerosis: A magnetic stimulation study	Objective: To quantify temperature induced changes (=Uhthoff phenomenon) in central motor conduction and their relation to clinical motor deficits in 20 multiple sclerosis (MS) patients. Methods: Self-assessment of vulnerability to temperature and clinical examination were performed. We used motor evoked potentials to measure central motor conduction time (CMCT) and applied the triple stimulation…	N		N	No healthy control group	N		Clinical Neurophysiology (2004) 115:11 (2493-2501). Date of Publication: November 2004							10.1016/j.clinph.2004.06.010	55	1	ZY077	WOS:000074584300006		No			42986
546	Humm A.M., Magistris M.R., Truffert A., Hess C.W., Rösler K.M.	Central motor conduction differs between acute relapsing-remitting and chronic progressive multiple sclerosis	Objective: To characterize central motor conduction in relation to the clinical deficits and to the disease duration in 90 patients with acute relapsing-remitting MS (RR-MS) and in 51 patients with chronic primary or secondary progressive MS (P-MS). Methods: The triple stimulation technique (TST) was used to quantify the central motor conduction failure (expressed by the TST amplitude ratio) and …	N		N	No healthy control group	N		Clinical Neurophysiology (2003) 114:11 (2196-2203). Date of Publication: November 2003							10.1016/S1388-2457(03)00231-1	105	6	105AK	WOS:000075049500005	9741789	No			42986
549	Humm, AM; Z'Graggen, WJ; Buhler, R; Magistris, MR; Rosler, KM	Quantification of central motor conduction deficits in multiple sclerosis patients before and after treatment of acute exacerbation by methylprednisolone	Objective: To compare the effects of intravenous methylprednisolone (IVMP) in patients with relapsing-remitting (RR-MS), secondary progressive (SP-MS), and primary progressive multiple sclerosis (PP-MS). Methods: Clinical and neurophysiological follow up was undertaken in 24 RR-MS, eight SP-MS, and nine PP-MS patients receiving Solu-Medrol 500 mg/d over five days for exacerbations involving the m…	N		N	No healthy control group	N		JOURNAL OF NEUROLOGY NEUROSURGERY AND PSYCHIATRY	2006	77	3	345	350		10.1136/jnnp.2005.065284	24	4	ZQ712	WOS:000073895500014	9619197	No			42986
550	Hummel F.	What can we learn from system neurosciences (fMRI, TMS) (#149)	In the last years neurorehabilitation got more and more into the focus of system neuroscience. As for a long period neurorehabilitation was not addressed by neuroscientific approaches, most of the understanding and knowledge in the filed came from therapeutic approaches and clinical observations and evaluations. However, the understanding of underlying mechanisms was still poor and furthermore th…	N		N	Irrelevant Review	N		Multiple Sclerosis (2012) 18:5 (S9). Date of Publication: May 2012							10.1177/1352458512444204	20	10	ZJ453	WOS:000073217200024		No			42986
551	Huntley A., Ernst E.	Complementary and alternative therapies for treating multiple sclerosis symptoms: A systematic review	Multiple sclerosis (MS) is a chronic disease of the central nervous system without a known cure. Thus the role of complementary and alternative therapies (CATs) for the management of symptoms lies in palliative care and this is borne out by the popularity of these treatments amongst MS sufferers. This review is aimed at determining whether this use is supported by evidence of effectiveness from r…	N		N	Irrelevant Review	N		Complementary Therapies in Medicine (2000) 8:2 (97-105). Date of Publication: June 2000							10.1054/ctim.2000.0366	42	3	ZD125	WOS:000072653900006	9549520	No			42986
555	Iglesias-Bregna D., Hanak S., Ji Z., Petty M., Liu L., Zhang D., McMonagle-Strucko K.	Effects of prophylactic and therapeutic teriflunomide in transcranial magnetic stimulation-induced motor-evoked potentials in the dark agouti rat model of experimental autoimmune encephalomyelitis	Teriflunomide is a once-daily oral immunomodulatory agent recently approved in the United States for the treatment of relapsing multiple sclerosis (RMS). This study investigated neurophysiological deficits in descending spinal cord motor tracts during experimental autoimmune encephalomyelitis (EAE; a model of multiple sclerosis) and the functional effectiveness of prophylactic or therapeutic teri…	N		N	Animal model	N		Journal of Pharmacology and Experimental Therapeutics (2013) 347:1 (203-211). Date of Publication: October 2013							10.1124/jpet.113.205146	105	2	ZF715	WOS:000072924800002	9743275	No			42986
556	Iglesias-Bregna D., Ji Z., Petty M., Liu L., Zhang D., Mcmonagle-Strucko K., Hanak S.	The effects of therapeutic teriflunomide in Transcranial Magnetic Stimulation-induced motor-evoked potentials in the Dark Agouti rat model of experimental autoimmune encephalomyelitis	Objective: To determine motor pathway function in experimental autoimmune encephalomyelitis (EAE) rats treated therapeutically with teriflunomide. Background: Teriflunomide is an oral immunomodulatory compound currently in Phase 3 studies for the treatment of multiple sclerosis (MS). Teriflunomide has been reported to delay onset and progression of EAE disease in the Dark Agouti (DA) rat model of…	N		N	Animal model	N		Journal of Neurology (2011) 258 SUPPL. 1 (S208). Date of Publication: May 2011							10.1007/s00415-011-6026-9	14	3	ZC507	WOS:000072587000006	9553845	No			42986
558	Ilic, TV; Stankovic, S; Ilic, NV; Kostic, SV; Djajic, V; Dominovic-Kovacevic, A	Neurophysiological evaluation of patients with degenerative diseases of the cervical spine	Bacground/Aim. Diagnostic protocol for patients with degenerative diseases of the cervical spine demands, in parallel with neuroimaging methods, functional evaluation through neurophysiological methods (somatosensitive and motor evoked potentials and electromyoneurography) aiming to evaluate possible subclinical affection of spinal medula resulting in neurological signs of long tract abnormalitie…	N		N	Cervical spondylarthropathy	N		VOJNOSANITETSKI PREGLED	2011	68	3	241	247		10.2298/VSP11032411	105	1	YW720	WOS:000071965900008	9532281	No			42986
559	Inaba, A; Yokota, T; Saito, Y; Ichikawa, T; Mizusawa, H	Proximal motor conduction evaluated by transcranial magnetic stimulation in acquired inflammatory demyelinating neuropathies	Objectives: To evaluate conduction abnormalities in the proximal motor nerve in patients with acquired inflammatory demyelinating neuropathies by transcranial magnetic stimulation (TMS). Methods: TMS intensity and background voluntary contraction (BVC) to evoke maximal size of motor evoked potential (MEP) in hand muscle were investigated in 24 normal subjects. Effect of experimentally induced con…	N		N	Acquired inflammatory demyelinating neuropathy	N		CLINICAL NEUROPHYSIOLOGY	2001	112	10	1936	1945		10.1016/S1388-2457(01)00643-5	105	1	ZD666	WOS:000072710200002		No			42986
560	Induruwa I., Constantinescu C.S., Gran B.	Fatigue in multiple sclerosis - A brief review	Fatigue is the most common and debilitating symptom in multiple sclerosis (MS) and is believed to be distinctly different from fatigue seen in other chronic conditions. It can affect a patient's mood, sleep and have a detrimental effect on their quality of life. In the recent years much literature has emerged in an attempt to elucidate the potential causes and treatment of this common symptom. Th…	N		N	Irrelevant Review	N		Journal of the Neurological Sciences (2012) 323:1-2 (9-15). Date of Publication: 15 Dec 2012							10.1016/j.jns.2012.08.007	3	1	YR191	WOS:000071469900007	9443712	No			42986
563	Ingram D.A., Thompson A.J., Swash M.	Central motor conduction in multiple sclerosis: Evaluation of abnormalities revealed by transcutaneous magnetic stimulation of the brain	Magnetic stimulation of the brain and spinal column was used to assess conduction in the descending central motor pathways controlling arm and leg muscles of 20 patients with multiple sclerosis, and 10 normal subjects. The multiple sclerosis patients had relapsing and remitting disease but all were ambulant and in stable clinical remission. Increased central motor conduction times (CMCTs), up to …	Y		Y		Y		Journal of Neurology Neurosurgery and Psychiatry (1988) 51:4 (487-494). Date of Publication: 1988								20	1	YP987	WOS:000071336000005	9448646	No			42986
565	INGRAM, DA; THOMPSON, AJ; SWASH, M	ABNORMALITIES OF CENTRAL MOTOR CONDUCTION IN MULTIPLE-SCLEROSIS REVEALED BY TRANS-CUTANEOUS MAGNETIC STIMULATION OF THE BRAIN		N	Proceedings	N	Conference	N	Conference	JOURNAL OF NEUROLOGY NEUROSURGERY AND PSYCHIATRY			LONDON	BRITISH MED ASSOC HOUSE, TAVISTOCK SQUARE, LONDON, ENGLAND WC1H 9JR	0022-3050	JUL	1987	154	6	YK745	WOS:A1997YK74500011	9398981	No			42986
568	Inomata-Terada, S; Okabe, S; Arai, N; Hanajima, R; Terao, Y; Frubayashi, T; Ugawa, Y	Effects of high frequency electromagnetic field (EMF) emitted by mobile phones on the human motor cortex	We investigated whether the pulsed high frequency electromagnetic field (EMF) emitted by a mobile phone has short term effects on the human motor cortex. We measured motor evoked potentials (MEPs) elicited by single pulse transcranial magnetic stimulation (TMS), before and after mobile phone exposure (active and sham) in 10 normal volunteers. Three sites were stimulated (motor cortex (CTX), brain…	N		N	Healthy controls only	N		BIOELECTROMAGNETICS	2007	28	7	553	561		10.1002/bem.20318	61	2	XY297	WOS:A1997XY29700009	9324083	No			42986
569	Ioyleva E., Krivosheeva M.S.	Optic neuritis in combination with keratoconus	PURPOSE: Diagnosis of optic neuritis in a patient with keratoconus. METHODS: A 40 years old male with keratoconus in both eyes, diagnosed 16 years prior. 12 years ago, he had penetrating keratoplasty. OCT performed on Cirrus HD-OCT (protocol Optic Disc Cube 200×200, program RNFL, Ganglion Cell Analysis: Macular Cube 512×128). Microperimetry performed on MR-1 'Nidek', using the program macula 10 d…	N		N	Optic neuritis	N		Neuro-Ophthalmology (2015) 39 SUPPL. 1 (S69). Date of Publication: 2015							10.3109/01658107.2015.1052265	3	6	XV476	WOS:A1997XV47600261		No			42986
570	Iriarte, J; Subira, ML; de Castro, P	Modalities of fatigue in multiple sclerosis: correlation with clinical and biological factors	Although different factors ore probably involved in the etiology of fatigue in multiple sclerosis patients, no definite mechanism has been proposed We have proposed that fatigue is a complex symptom that includes three clinical different entities (asthenia, fatigability and worsening of symptoms with effort). The goal of this study is to demonstrate if there is a peculiar mechanism for each of th…	N		N	No TMS	N		MULTIPLE SCLEROSIS	2000	6	2	124	130		10.1191/135245800678827572	13	6	WX416	WOS:A1997WX41600002	9152201	No			42986
571	Isagulyan E., Shabalov V., Salova E., Khitj M.	Motor cortex stimulation in the treatment of neurogenic pain syndromes	Objectives: We aim to present the outcomes of MCS for the treatment of severe deafferentation pain in our institution. Material and methods: Totally 22 patients were undergone to implantation of epidural electrodes over the central sulcus region from 2005 until 2011. There were 12 males and 10 females, aged 29 - 56 years. In case of positive trial stimulation in 20 of them the neurostimulator was…	N		N	No TMS	N		Stereotactic and Functional Neurosurgery (2012) 90 SUPPL. 1 (80). Date of Publication: September 2012							10.1159/000342226	19	11	WT814	WOS:A1997WT81400002	9104931	No			42986
572	Istvan, B; Till, A; Grass, F; Szabo, AE	Phantom pain reduction by low-frequency and low-intensity electromagnetic fields	Although various treatments have been presented for phantom pain, there is little proof supporting the benefits of pharmacological treatments, surgery or interventional techniques, electroconvulsive therapy, electrical nerve stimulation, far infrared ray therapy, psychological therapies, etc. Here, we report the preliminary results for phantom pain reduction by low-frequency and intensity electro…	N		N	No TMS	N		ELECTROMAGNETIC BIOLOGY AND MEDICINE	2011	30	3	115	127		10.3109/15368378.2011.596246	101	5	WZ119	WOS:A1997WZ11900001	9118833	No			42986
573	Iwata N.K., Ugawa Y.	The effects of cerebellar stimulation on the motor cortical excitability in neurological disorders: A review	The cerebellum regulates execution of skilled movements through neural connections with the primary motor cortex. A main projection from the cerebellum to the primary motor cortex is a disynaptic excitatory pathway relayed at the ventral thalamus. This dentatothalamocortical pathway receives inhibitory inputs from Purkinje cells of the cerebellar cortex. These pathways (cerebellothalamocortical p…	N		N		N	IRRELEVANT REVIEW	Cerebellum (2005) 4:4 (218-223). Date of Publication: 1 Dec 2005							10.1080/14734220500277007	141	1-2	WZ119	WOS:A1997WZ11900005	9118836	No			42986
575	JACOBSON, JI	PINEAL-HYPOTHALAMIC TRACT MEDIATION OF PICOTESLA MAGNETIC-FIELDS IN THE TREATMENT OF NEUROLOGICAL DISORDERS	The objective of this study is analysis of the clinical efficacy of picotesla magnetic fields in the treatment of epilepsy, Parkinson's disease and multiple sclerosis. The method utilized involved the exogeneous application of physiologic, very weak magnetic fields to the brain by Sandyk, Anninos, Derpapas and Tsagas. The magnetic device produced a magnetic field ranging from about 5 x 10(-8) gau…	N		N	Methods	N		PANMINERVA MEDICA			TURIN	CORSO BRAMANTE 83-85 INT JOURNALS DEPT., 10126 TURIN, ITALY	0031-0808	DEC	1994	101	4	XD740	WOS:A1997XD74000003	9160343	No			42986
576	Jacome, DE	Synkinetic blepharoclonus	Objectives: To analyze the clinical data and test results collected in a group of patients exhibiting eyelid-closure blepharoclonus (BLC) on clinical neurologic examination. Materials and Methods: Thirty-five patients were referred for neurologic evaluation for reasons other than BLC. Clinical electrophysiologic evaluations, including cranial nerve testing and electromyograms, were done according…	N		N	Eyelid-closure blepharoclonus	N		JOURNAL OF NEURO-OPHTHALMOLOGY	2000	20	4	276	284			27	2	VZ332	WOS:A1997VZ33200011	8995585	No			42986
577	Jagessar, SA; Kap, YS; Heijmans, N; van Driel, N; van Straalen, L; Bajramovic, JJ; Brok, HPM; Blezer, ELA; Bauer, J; Laman, JD; 't Hart, BA	Induction of Progressive Demyelinating Autoimmune Encephalomyelitis in Common Marmoset Monkeys Using MOG(34-56) Peptide in Incomplete Freund Adjuvant	Experimental autoimmune encephalomyelitis in the neotropical primate common marmoset (Callithrix jacchus) is a relevant autoimmune animal model of multiple sclerosis. T cells specific for peptide 34 to 56 of myelin/oligodendrocyte glycoprotein (MOG(34-56)) have a central pathogenic role in this model. The aim of this study was to assess the requirement for innate immune stimulation for activation…	N		N	Animal model	N		JOURNAL OF NEUROPATHOLOGY AND EXPERIMENTAL NEUROLOGY	2010	69	4	372	385		10.1097/NEN.0b013e3181d5d053	101	3	VY202	WOS:A1996VY20200031	8970369	No			42986
578	Jasek L., Siger M., Berkowicz T., Selmaj K.	Multiparametric MRI analysis of patients with late multiple sclerosis	Objective: To investigate brain damage in patients with late multiple sclerosis using conventional and non- conventional MRI. Background One of an atypical form of MS are patients with disease onset after 50 years of age(late onset multiple sclerosis, LOMS). It is of primary interest to compare LOMS with MS patients having a typical form of disease (TMS). Design/Methods: We studied 37 MS patients…	N		N	No TMS	N		Neurology (2012) 78:1 Meeting Abstract. Date of Publication: 22 Apr 2012							10.1212/WNL.78.1	138	1-2	VT543	WOS:A1996VT54300013	8946338	No			42986
579	Jasek L., Siger M., Berkowicz T., Zaleski K., Selmaj K.	Conventional magnetic resonance imaging and brain atrophy in late-onset multiple sclerosis patients	Background: Late onset MS (LOMS) is defined when disease symptoms appear after 50 year of age. Limited data are available with regard to potential differences in MRI between LOMS and cases with more typical, earlier presentation (tMS). Goals: The goal of this study was to compare conventional MR findings and atrophy in LOMS and tMS. Methods: 17 LOMS and 17 tMS were included in the study. Both MS …	N		N	No TMS	N		Multiple Sclerosis (2011) 17:10 SUPPL. 1 (S66). Date of Publication: October 2011							10.1177/1352458511422300	46	6
580	Jenkins, TM; Toosy, AT; Ciccarelli, O; Miszkiel, KA; Wheeler-Kingshott, CA; Henderson, AP; Kallis, C; Mancini, L; Plant, GT; Miller, DH; Thompson, AJ	Neuroplasticity Predicts Outcome of Optic Neuritis Independent of Tissue Damage	Objectives: To determine whether lateral occipital complex (LOC) activation with functional magnetic resonance imaging (fMRI) predicts visual outcome after clinically isolated optic neuritis (ON). To investigate the reasons behind good recovery following ON, despite residual optic nerve demyelination and neuroaxonal damage. Methods: Patients with acute ON and healthy volunteers were studied longi…	N		N	Optic neuritis	N		ANNALS OF NEUROLOGY	2010	67	1	99	113		10.1002/ana.21823	46	5	VU118	WOS:A1996VU11800013		No			42986
581	Jensen T.S., Finnerup N.B.	Allodynia and hyperalgesia in neuropathic pain: Clinical manifestations and mechanisms	Allodynia (pain due to a stimulus that does not usually provoke pain) and hyperalgesia (increased pain from a stimulus that usually provokes pain) are prominent symptoms in patients with neuropathic pain. Both are seen in various peripheral neuropathies and central pain disorders, and affect 15-50% of patients with neuropathic pain. Allodynia and hyperalgesia are classified according to the senso…	N		N	Neuropathic pain	N		The Lancet Neurology (2014) 13:9 (924-935). Date of Publication: 2014							10.1016/S1474-4422(14)70102-4	45	4
583	Johannsen D., Frederiksen J.L.	Medical and surgical treatment of trigeminal neuralgia in patients with multiple sclerosis: A literature review	Objective: The aim of this literature review is to evaluate advantages and limitations of medical and surgical treatment of trigeminal neuralgia (TN) in patients with multiple sclerosis (MS), and which treatment, or combination of treatments, has the best outcome. Materials and methods: A systematic literature search in PubMed was performed using the MeSH key words multiple sclerosis, trigeminal …	N		N		N		Multiple Sclerosis (2016) 22 Supplement 3 (380). Date of Publication: 1 Sep 2016							10.1177/1352458516663081	71	2	VZ924	WOS:A1996VZ92400005	8978622	No			42986
584	Johnson, RA; Baker-Herman, TL; Duncan, ID; Mitchell, GS	VENTILATORY IMPAIRMENT IN THE DYSMYELINATED LONG EVANS SHAKER RAT	Although respiratory complications significantly contribute to morbidity/mortality in advanced myelin disorders, little is known concerning mechanisms whereby dysmyelination impairs ventilation, or how patients compensate (i.e. plasticity). To establish a model for studies concerning mechanisms of ventilatory impairment/compensation, we tested the hypotheses that respiratory function progressivel…	N		N	Animal model	N		NEUROSCIENCE	2010	169	3	1105	1114		10.1016/j.neuroscience.2010.06.010	21	4	VN041	WOS:A1996VN04100007	8874400	No			42986
585	Jones S.M., Streletz L.J., Raab V.E., Knobler R.L., Lublin F.D.	Lower extremity motor evoked potentials in multiple sclerosis	Transcranial magnetic stimulation was performed on 25 patients with definite multiple sclerosis. Motor evoked potentials were recorded from the anterior tibial muscle. Central motor conduction time was calculated using the equation (F + M - 1)/2 by stimulation of the common peroneal nerve. Motor evoked potentials were capable of detecting subclinical pyramidal tract lesions in multiple sclerosis.…	N		N	No healthy control group	N		Archives of Neurology (1991) 48:9 (944-948). Date of Publication: 1991								101	1	VT831	WOS:A1996VT83100006	8913193	No			42986
587	Jones U.F., Busse M., Enright S., Rosser A.	A pilot study of influences on physical activity level and exercise capacity in people with huntington's disease	Purpose: The purpose of this study was to investigate disease specific and respiratory function measures that may influence physical activity levels and exercise capacity in people with Huntington's disease. Relevance: Huntington's disease (HD) is a neurodegenerative condition resulting in motor, cognitive and behavioural dysfunction. As with Parkinson's disease and multiple sclerosis, physiother…	N		N	Huntington's disease	N		Physiotherapy (United Kingdom) (2011) 97 SUPPL. 1 (eS570). Date of Publication: June 2011							10.1016/j.physio.2011.04.002	196	2	VH322	WOS:A1996VH32200009	8880692	No			42986
589	Joo, EY; Hong, SB; Kim, HJ; Lim, YH; Koo, DL; Ji, KH; Tae, WS	The effect of modafinil on cortical excitability in patients with narcolepsy: A randomized, placebo-controlled, crossover study	Objective: To investigate the effect of modafinil on cortical excitability in patients with narcolepsy using transcranial magnetic stimulation (TMS). Methods: Nineteen drug-naive narcolepsy patients with cataplexy (10 males, 9 females, and mean age 28.5 years) and 25 age- and sex-matched healthy controls were recruited. In this double-blind, randomized, crossover study, patients and controls rece…	N		N	Narcolepsy	N		SLEEP MEDICINE	2010	11	9	862	869		10.1016/j.sleep.2010.07.003	10	3	VC983	WOS:A1996VC98300002	8761036	No			42986
590	Jørgensen L.M., Nielsen J.E., Ravnborg M.	MEP recruitment curves in multiple sclerosis and hereditary spastic paraplegia	Objective: Axons remodel at multiple levels after a single inflammatory lesion in the spinal cord, which can contribute to recovery. The primary aim of this study was to investigate whether the MEP response as function of the excitatory strength, here called recruitment curves, may be used in discriminating demyelination from compensated axonal loss. Multiple sclerosis (MS) represents both demyel…	N	"Established diagnosis"?	N	No EDSS	N	No EDSS	Journal of the Neurological Sciences (2005) 237:1-2 (25-29). Date of Publication: 15 Oct 2005							10.1016/j.jns.2005.05.002	26	4	VB797	WOS:A1996VB79700008		No			42986
593	Jovanova-Nesic K.D., Jankovic B.D.	The neuronal and immune memory systems as supervisors of neural plasticity and aging of the brain: From phenomenology to coding of information	The ultimate goal of this report is to learn how to manipulate the level of memory T cells for more effective treatment of such neurological diseases as multiple sclerosis (MS), where certain T cell subsets recognize self-antigens as opposed to pathogen antigens, and Alzheimer's disease (AD). Brain lesions (electrolitically, by kainic acid, with AlCl, and with 6-OHDA); stimulations (electrical, m…	N		N	No TMS	N		Annals of the New York Academy of Sciences (2005) 1057 (279-295). Date of Publication: 2005							10.1196/annals.1356.022	18	12	UR312	WOS:A1996UR31200011	8647038	No			42986
595	Jovanova-Nesic, K; Jovicic, S; Sovilj, M; Spector, NH	MAGNETIC BRAIN STIMULATION UPREGULATES ADHESION AND PREVENTS EAE: MMP-2, ICAM-1, AND VCAM-1 IN THE CHOROID PLEXUS AS A TARGET	We are most thankful to Prof. Yehuda Shoenfeld, head of Autoimmunity Center, Sheba Hospital at Tel Aviv, University in Israel, for critical and constructive comments on the manuscript. Thanks to Prof. B. Reljin and N. Stepanic, School of Informational Technology, Universirty of Belgrade for contribution in molecular images and computing analysis. Authors gratefully acknowledge the repeated gifts …	N		N	Animal model	N		INTERNATIONAL JOURNAL OF NEUROSCIENCE	2009	119	9	1399	1418		10.1080/00207450802324564	12	5	UR405	WOS:A1996UR40500022	8791253	No			42986
596	Jovanova-Nesic, KD; Jankovic, BD	The neuronal and immune memory systems as supervisors of neural plasticity and aging of the brain - From phenomenology to coding of information	The ultimate goal of this report is to learn how to manipulate the level of memory T cells for more effective treatment of such neurological diseases as multiple sclerosis (MS), where certain T cell subsets recognize self-antigens as opposed to pathogen antigens, and Alzheimer's disease (AD). Brain lesions (electrolitically, by kainic acid, with AlCl, and with 6-OHDA); stimulations (electrical, m…	N		N	No TMS	N		REVERSAL OF AGING: RESETTING THE PINEAL CLOCK	2005	1057		279	295		10.1196/annals.1356.022	5	3	UQ777	WOS:A1996UQ77700024	8649560	No			42986
597	Jung P., Beyerle A., Humpich M., Neumann-Haefelin T., Lanfermann H., Ziemann U.	Ipsilateral silent period: A marker of callosal conduction abnormality in early relapsing-remitting multiple sclerosis?	Objective: The corpus callosum (CC) is commonly affected in multiple sclerosis (MS). The ipsilateral silent period (iSP) is a putative electrophysiological marker of callosal demyelination. The purpose of this study was to re-assess, under recently established optimised protocol conditions [Jung P., Ziemann U. Differences of the ipsilateral silent period in small hand muscles. Muscle Nerve in pre…	N		N	No healthy control group	N		Journal of the Neurological Sciences (2006) 250:1-2 (133-139). Date of Publication: 1 Dec 2006							10.1016/j.jns.2006.08.008	59	2	UK628	WOS:A1996UK62800038	8628489	No			42986
599	Jung P., Ziemann U.	Transcranial magnetic stimulation in multiple sclerosis	Measures of transcranial magnetic stimulation (TMS) are currently not considered in the diagnostic criteria of multiple sclerosis (MS). This is due to a less sensitive identification of subclinical and spatial disseminated cerebral lesions with TMS and other evoked potential (EP) measures compared to conventional magnetic resonance imaging (MRI) techniques. However, motor evoked potentials (MEP) …	N		N		N		Klinische Neurophysiologie (2005) 36:4 (155-160). Date of Publication: Dec 2005							10.1055/s-2005-915310	3	1	UE706	WOS:A1996UE70600031	8607092	No			42986
601	Jung, P; Ziemann, U	Differences of the ipsilateral silent period in small hand muscles	The ipsilateral silent period (iSP) is thought to depend on activity transmitted by the corpus callosum, but ipsilateral corticospinal pathways may also contribute. Because the presence of ipsilateral corticospinal pathways differs between small hand muscles, we compared the iSP in the first dorsal interosseous (FDI) and abductor pollicis brevis (APB) muscles. The iSP was elicited in 20 healthy s…	N		N	Healthy controls only	N		MUSCLE & NERVE	2006	34	4	431	436		10.1002/mus.20604	242	3	TX743	WOS:A1996TX74300018	9053803	No			42986
604	Kale N., Agaoglu J., Onder G., Tanik O.	Correlation between disability and transcranial magnetic stimulation abnormalities in patients with multiple sclerosis	Multiple sclerosis (MS) is an idiopathic inflammatory demyelinating disorder of the central nervous system. Clinical evaluation, MRI, cerebrospinal fluid testing and evoked potentials (EP) are among the available methods utilized for disease diagnosis and monitoring. To date, no surrogate markers have been established to assess disease evolution and progression. The aim of this study is to assess…	N		N	No healthy control group	N		Journal of Clinical Neuroscience (2009) 16:11 (1439-1442). Date of Publication: November 2009							10.1016/j.jocn.2009.03.009			TX461	WOS:A1996TX46100014	8658253	No			42986
605	Kale N., Agaoglu J., Tanik O.	Electrophysiological and clinical correlates of corpus callosum atrophy in patients with multiple sclerosis	Multiple sclerosis (MS) is an idiopathic inflammatory demyelinating disorder of the central nervous system (CNS) characterized by demyelination and axonal degeneration. Corpus callosum (CC) is commonly involved during the disease process leading to atrophy (93%). Currently, there are no established markers of disease progression and the interplay of processes leading to brain atrophy in MS remain…	Y		Y		Y		Neurological Research (2010) 32:8 (886-890). Date of Publication: 1 Oct 2010							10.1179/016164109X12445616596526	39	3	UB642	WOS:A1996UB64200005	8625875	No			42986
607	Kale N., Agaoglu J., Tanik O.	Clinical, neuroimaging and electrophysiological correlates of brain atrophy in multiple sclerosis	Objective: This study aims to search for a correlation between transcranial magnetic stimulation (TMS) evoked motor potentials (MEPs), expanded disability status scale (EDSS), corpus callosum (CC) atrophy in MS patients. Background: MS is a chronic progressive inflammatory demyelinating disease and axonal degeneration is recognized as the cause of disability and disease progression. The most comm…	N	conference	N	Conference	N	Conference	Journal of Neurology (2009) 256 SUPPL. 2 (S237). Date of Publication: June 2009							10.1007/s00415-009-5161-z	36	4	UB938	WOS:A1996UB93800001	8685490	No			42986
608	Kale N., Ozdemir G., Coban E., Agaoglu J.	Evaluating TMS motor evoked potentials in early stages of multiple sclerosis aid in predicting disability	OBJECTIVE:The aim of this study is to assess transcranial magnetic stimulation (TMS) motor evoked potential (MEP) parameters in clinically definite MS patients in early stages with no pyramidal tract involvement and investigate the possible correlations between TMS abnormalities and disability.BACKGROUND:Multiple sclerosis (MS) is an idiopathic inflammatory disorder of the central nervous system …	U	Not there	U	Unable to find online	N	Cannot obtain article	Neurology (2014) 82:10 SUPPL. 1. Date of Publication: 8 Apr 2014								57		V3047	WOS:000169555700001		No			42986
613	Kalkers, NF; Strijers, RLM; Jasperse, MMS; Neacsu, V; Geurts, JJG; Barkhof, F; Polman, CH; Stam, CJ	Motor evoked potential: A reliable and objective measure to document the functional consequences of multiple sclerosis? Relation to disability and MRI	Objective: In an attempt to analyze whether MEP can serve as a valid measure for evaluating neurological dysfunction in multiple sclerosis (MS), we related MEP to clinical and MRI measures. Methods: Transcranial magnetic stimulation was applied in 52 MS patients to determine the central motor conduction time (CMCT) to the extremities. We calculated Z-scores for each CMCT (Zcmct) corrected for hei…	N		N	No healthy control group	N		CLINICAL NEUROPHYSIOLOGY	2007	118	6	1332	1340		10.1016/j.clinph.2007.02.018	344	8915	VM488	WOS:A1996VM48800004	8975112	No			42986
615	Kandler R.H., Jarratt J.A., Davies-Jones G.A.B., Gumpert E.J.W., Venables G.S., Sagar H.J., Zeman A.	The role of magnetic stimulation as a quantifier of motor disability in patients with multiple sclerosis	Magnetic stimulation was used to measure motor conduction time (MCT) between head and neck in a prospective longitudinal study of patients with multiple sclerosis (MS) and normal subjects. MCT measurements showed a high degree of reproducibility in normal subjects and patients with stable MS. In patients with definite MS, there was significant positive correlation between MCT and motor disability…	Y		U	Secondary analysis of TMS data	N	No mean MEP data at baseline	Journal of the Neurological Sciences (1991) 106:1 (31-34). Date of Publication: 1991							10.1016/0022-510X(91)90190-I	90	6	TF655	WOS:A1995TF65500007	7477063	No			42986
616	Kandler R.H., Jarratt J.A., Gumpert E.J.W., Davies-Jones G.A.B., Venables G.S., Sagar H.J.	The role of magnetic stimulation in the diagnosis of multiple sclerosis	Magnetic stimulation was used to measure motor conduction time (MCT) between head and neck, and head and lumbar region, as well as amplitude of the motor evoked potential (MEP) in normal subjects and patients with multiple sclerosis (MS). Patients with definite MS had significantly longer MCTs and smaller amplitude MEPs than normal subjects when recording from arm and leg muscles. In a comparison…	U	33 had suspected MS?	N	No EDSS	N	No EDSS	Journal of the Neurological Sciences (1991) 106:1 (25-30). Date of Publication: 1991							10.1016/0022-510X(91)90189-E	17	6	RW073	WOS:A1995RW07300005	8576391	No			42986
618	KANDLER, RH; JARRATT, JA; DAVIESJONES, GAB; GUMPERT, EJW; SAGAR, HJ; VENABLES, GS	THE CLINICAL-VALUE OF MAGNETIC STIMULATION IN THE MANAGEMENT OF PATIENTS WITH MULTIPLE-SCLEROSIS		U	Not there	U	Unable to find online	N	Cannot obtain article	JOURNAL OF PHYSIOLOGY-LONDON			NEW YORK	40 WEST 20TH STREET, NEW YORK, NY 10011-4211	0022-3751		1991	57	5	RW884	WOS:A1995RW88400003	20719646	No			42986
621	Kapoor S.	Transcranial magnetic stimulation: Clinical applications beyond depression		N		N		N		Journal of Clinical Psychiatry (2008) 69:7 (1191). Date of Publication: July 2008								90	4	RM830	WOS:A1995RM83000008	7629529	No			42986
623	Karandreas, N; Papadopoulou, M; Kokotis, P; Papapostolou, A; Tsivgoulis, G; Zambelis, T	Impaired interhemispheric inhibition in amyotrophic lateral sclerosis	The pathogenesis of sporadic amyotrophic lateral sclerosis (ALS) remains unknown. Neurophysiological studies provide evidence of hyperexcitability of the motor cortex or of impairment of inhibitory intrahemispheric modulation of the corticomotoneuron in ALS. In this paper, we used TMS to elicit transcallosal inhibition of the motor cortex in ALS patients in order to investigate whether interhemis…	N		N	ALS	N		AMYOTROPHIC LATERAL SCLEROSIS	2007	8	2	112	118		10.1080/17482960601030113	93	1	TC708	WOS:A1995TC70800008		No			42986
624	KARHU, J; HARI, R; MAKELA, JP; HUTTUNEN, J; KNUUTILA, J	CORTICAL SOMATOSENSORY MAGNETIC RESPONSES IN MULTIPLE-SCLEROSIS	Somatosensory evoked magnetic fields (SEFs) to contralateral median and ulnar nerve stimulation were analyzed in 10 patients with multiple sclerosis and in 8 healthy controls. SEFs were recorded with a 24-channel SQUID gradiometer over both hemispheres. Seven patients showed abnormally large-amplitude SEF deflections at 60-80 msec; 5 of them had multiple lesions around lateral ventricles in magne…	N		N	No TMS	N		ELECTROENCEPHALOGRAPHY AND CLINICAL NEUROPHYSIOLOGY		Hari, Riitta/J-1880-2012	CLARE	CUSTOMER RELATIONS MANAGER, BAY 15, SHANNON INDUSTRIAL ESTATE CO, CLARE, IRELAND	0013-4694	SEP	1992	17	2	QG985	WOS:A1995QG98500002	7751853	No			42986
625	KASAI, T; HAYES, KC; WOLFE, DL; ALLATT, RD	AFFERENT CONDITIONING OF MOTOR EVOKED-POTENTIALS FOLLOWING TRANSCRANIAL MAGNETIC STIMULATION OF MOTOR CORTEX IN NORMAL SUBJECTS	The present study determined the effects of percutaneous electrical stimulation of the plantar surface on motor evoked potentials (MEPs) in tibialis anterior (TA) and soleus (SOL) of normal subjects following transcranial magnetic stimulation of motor cortex. The conditioning stimulation consisted of a 20 msec train of electrical pulses (500 Hz; 0.1 msec rectangular) delivered to the medial borde…	N		N	Healthy controls only	N		ELECTROENCEPHALOGRAPHY AND CLINICAL NEUROPHYSIOLOGY			CLARE	CUSTOMER RELATIONS MANAGER, BAY 15, SHANNON INDUSTRIAL ESTATE CO, CLARE, IRELAND	0013-4694	APR	1992	94	2
626	KAWAI, N; NAGAO, S; FRIEDMAN, WA; ORO, J	ORIGINS AND CONDUCTING PATHWAYS OF MOTOR EVOKED-POTENTIALS ELICITED BY TRANSCRANIAL MAGNETIC STIMULATION IN CATS	SPINAL CORD MOTOR evoked potentials (MEPs-S) were elicited in cats by transcranial magnetic stimulation. The MEPs-S recorded from the epidural electrode at the first lumbar (Ll) level consisted of four negative peaks (N1, 2.56; N2, 3.19; N3, 4.06; N4, 4.99 ms) followed by small, multiphasic waves. The mean conduction velocities of N1-N3 of the MEPs-S were calculated to be 90 to 115 m/s, which is …	N		N	Animal model	N		NEUROSURGERY			BALTIMORE	351 WEST CAMDEN ST, BALTIMORE, MD 21201-2436	0148-396X	SEP	1992	94	4	BE59T	WOS:A1995BE59T00111		No			42986
627	KENTBRAUN, JA; SHARMA, KR; MILLER, RG; WEINER, MW	POSTEXERCISE PHOSPHOCREATINE RESYNTHESIS IS SLOWED IN MULTIPLE-SCLEROSIS	To determine whether skeletal muscle oxidative metabolism is impaired in multiple sclerosis (MS),(31) phosphorus magnetic resonance spectroscopy was used to measure the rate of intramuscular phosphocreatine (PCr) resynthesis following exercise in MS and controls. Thirteen MS patients underwent intermittent isometric tetanic contractions of the dorsiflexor muscles elicited by stimulation of the pe…	N		N	No TMS	N		MUSCLE & NERVE			NEW YORK	605 THIRD AVE, NEW YORK, NY 10158-0012	0148-639X	AUG	1994	24	4	RZ726	WOS:A1995RZ72600014	8577083	No			42986
628	Kent-Braun, JA; Sharma, KR; Miller, RG; Weiner, MW	Effects of electrically stimulated exercise training on muscle function in multiple sclerosis	To investigate whether electrically stimulated exercise training might reduce muscle fatigue in persons with multiple sclerosis (MS), the dorsiflexor muscles of six patients were trained (60 min/d, 6d/wk, 8 wks) with electrically stimulated endurance exercise (50 Hz tetanic contractions, 25% duty cycle). There was evidence of transient muscle injury at the onset of training (reduced tetanic force…	N		N	No TMS	N		JOURNAL OF NEUROLOGIC REHABILITATION			NEW YORK	386 PARK AVE SOUTH, STE 201, NEW YORK, NY 10016 USA	0888-4390		1996	89	6	QW067	WOS:A1994QW06700011	7603740	No			42986
629	Keser, Z; Hasan, KM; Mwangi, BI; Kamali, A; Ucisik-Keser, FE; Riascos, RF; Yozbatiran, N; Francisco, GE; Narayana, PA	Diffusion tensor imaging of the human cerebellar pathways and their interplay with cerebral macrostructure	Cerebellar white matter (WM) connections to the central nervous system are classified functionally into the Spinocerebellar (SC), vestibulocerebellar (VC), and cerebrocerebellar subdivisions. The SC pathways project from spinal cord to cerebellum, whereas the VC pathways project from vestibular organs of the inner ear. Cerebrocerebellar connections are composed of feed forward and feedback connec…	N		N	No TMS	N		FRONTIERS IN NEUROANATOMY	2015	9				41	10.3389/fnana.2015.00041	89	6	PU663	WOS:A1994PU66300010	7964848	No			42986
630	Kiers, L	Magnetic stimulation of the motor cortex: Clinical applications	Transcranial magnetic cortical stimulation provides the clinical neurophysiologist with a method to examine alterations in the function of central motor pathways in diseases affecting the motor system. The technique has great research potential and has led to increased understanding of intracortical physiology, corticospinal tract function, motor system plasticity and motor control. Subclinical c…	N		N		N	IRRELEVANT REVIEW	JOURNAL OF CLINICAL NEUROSCIENCE			EDINBURGH	JOURNAL PRODUCTION DEPT, ROBERT STEVENSON HOUSE, 1-3 BAXTERS PLACE, LEITH WALK, EDINBURGH EH1 3AF, MIDLOTHIAN, SCOTLAND	0967-5868	JAN	1997	89	6	NV732	WOS:A1994NV73200009	7912392	No			42986
631	KIERS, L; CROS, D; CHIAPPA, KH; FANG, J	VARIABILITY OF MOTOR POTENTIALS-EVOKED BY TRANSCRANIAL MAGNETIC STIMULATION	We studied the effect of stimulus intensity, coil size, mental alertness and prestimulus muscle contraction on the variability of motor evoked potentials (MEPs) produced by magnetic cortical stimulation (MCS). In 5 healthy subjects we delivered MCS either with a circular coil centered at the vertex or a figure-8 coil centered over the motor cortex hand area, recording from first dorsal interosseo…	N		N	Healthy controls only	N		ELECTROENCEPHALOGRAPHY AND CLINICAL NEUROPHYSIOLOGY			CLARE	CUSTOMER RELATIONS MANAGER, BAY 15, SHANNON INDUSTRIAL ESTATE CO, CLARE, IRELAND	0013-4694	DEC	1993	20	4
632	Kim, GW; Ko, MH	Facilitation of corticospinal tract excitability by transcranial direct current stimulation combined with voluntary grip exercise	Previous studies have established that transcranial direct current stimulation (tDCS) is a powerful technique for the deliberate manipulation of the activity of human cerebral cortex. Moreover, it has also been shown that the non-exhausted voluntary motor exercise increases the excitability of corticospinal tract. We conducted this study to define the facilitation effect following anodal tDCS com…	N		N	Healthy controls only	N		NEUROSCIENCE LETTERS	2013	548		181	184		10.1016/j.neulet.2013.05.037	241	1	NR954	WOS:A1994NR95400002	7515784	No			42986
633	Kim, HJ; Tetreault, LA; Massicotte, EM; Arnold, PM; Skelly, AC; Brodt, ED; Riew, KD	Differential Diagnosis for Cervical Spondylotic Myelopathy Literature Review	Study Design. Literature review. Objective. To identify case series that have been confused with cervical spondylotic myelopathy (CSM) to develop a comprehensive differential diagnosis. Summary of Background Data. Myelopathy can be caused by a number of different etiologies. In those patients with CSM, the presentation is not always clear. Distinct radiographical and clinical characteristics, whi…	N		N	Irrelevant Review	N		SPINE	2013	38	22	S78	S88		10.1097/BRS.0b013e3182a7eb06	9	5	NN055	WOS:A1994NN05500011	8196707	No			42986
634	Kim, SE; Turkington, K; Kushmerick, C; Kim, JH	Central dysmyelination reduces the temporal fidelity of synaptic transmission and the reliability of postsynaptic firing during high-frequency stimulation	Auditory brain stem circuits rely on fast, precise, and reliable neurotransmission to process auditory information. To determine the fundamental role of myelination in auditory brain stem function, we examined the evoked auditory brain stem response (ABR) from the Long Evans shaker (LES) rat, which lacks myelin due to a genetic deletion of myelin basic protein. In control rats, the ABR evoked by …	N		N	Animal model	N		JOURNAL OF NEUROPHYSIOLOGY	2013	110	7	1621	1630		10.1152/jn.00117.2013	89	4	NK963	WOS:A1994NK96300009	8201326	No			42986
635	Kira, J; Horiuchi, I; Suzuki, J; Osoegawa, M; Tobimatsu, S; Murai, H; Minohara, M; Furue, M; Ochi, H	Myelitis associated with atopic disorders in Japan: a retrospective clinical study of the past 20 years	Objective To clarify the clinical features of myelitis associated with atopic disorders in Japanese patients. Subjects and Methods We retrospectively studied the clinical, immunological and electrophysiological features of 68 consecutive patients with myelitis of acute or subacute onset diagnosed at Kyushu University Hospital during the past 20 years. Results While only 2 of 28 (7%) patients with…	N		N	No TMS	N		INTERNAL MEDICINE	2001	40	7	613	619		10.2169/internalmedicine.40.613	16	5	NG235	WOS:A1994NG23500007	7512912	No			42986
636	Kirimoto, H; Tamaki, H; Onishi, H	Difference in Cortical Relay Time Between Intrinsic Muscles of Dominant and Nondominant Hands	The authors aimed to calculate and compare cortical relay time (CRT) between intrinsic hand muscles and between homonymous muscles of dominant and nondominant hands. The participants comprised 22 healthy volunteers. The CRT for long-latency reflexes (LLRs) was calculated by subtracting the peak latency of somatosensory evoked potentials of component N20 and the onset latency of motor evoked poten…	N		N	Healthy controls only	N		JOURNAL OF MOTOR BEHAVIOR	2017	49	4	467	475		10.1080/00222895.2016.1241745	86	4	MZ898	WOS:A1994MZ89800011	7511526	No			42986
637	Kirkegaard, M; Nielsen, JF; Jakobsen, J	Transcranial magnetic stimulation and multiple sclerosis functional composite		N	Poster session	N	Conference	N	Conference	JOURNAL OF THE NEUROLOGICAL SCIENCES	2005	238		S232	S232			150	1	MU246	WOS:A1994MU24600014	8114794	No			42986
638	Kishi T., Murakami T., Sato T., Funatsuka M., Aihara Y., Nagaki S., Osawa M.	Two Japanese girls with juvenile-onset tumefactive multiple sclerosis	Background: Tumefactive multiple sclerosis (TMS), characterized by large white matter demyelinating lesions on brain MRI, is difficult to distinguish TMS from brain tumors, especially glioma. We report characteristic findings in two Japanese girls with TMS. Cases: Patient 1 developed sudden onset left hemiplegia and intracranial hypertension. Patient 2 suffered left hemiplegia and left homonymous…	N		N	No TMS	N		European Journal of Paediatric Neurology (2011) 15 SUPPL. 1 (S108). Date of Publication: May 2011							10.1016/S1090-3798(11)70374-9	22	3	PE743	WOS:A1994PE74300013	7941889	No			42986
639	Klein, MM; Treister, R; Raij, T; Pascual-Leone, A; Park, L; Nurmikko, T; Lenz, F; Lefaucheur, JP; Lang, M; Hallett, M; Fox, M; Cudkowicz, M; Costello, A; Carr, DB; Ayache, SS; Oaklander, AL	Transcranial magnetic stimulation of the brain: guidelines for pain treatment research	Recognizing that electrically stimulating the motor cortex could relieve chronic pain sparked development of noninvasive technologies. In transcranial magnetic stimulation (TMS), electromagnetic coils held against the scalp influence underlying cortical firing. Multiday repetitive transcranial magnetic stimulation (rTMS) can induce long-lasting, potentially therapeutic brain plasticity. Nearby fe…	N		N	Irrelevant Review	N		PAIN	2015	156	9	1601	1614		10.1097/j.pain.0000000000000210	85	6	QB042	WOS:A1994QB04200021	7856383	No			42986
640	KLOTEN, H; MEYER, BU; BRITTON, TC; BENECKE, R	MAGNETIC STIMULATION - STANDARDIZED DETERMINATION OF NORMAL VALUES FOR CENTRAL AND PERIPHERAL MOTOR LATENCIES REGARDING AGE-DEPENDENT CHANGES	A number of 57 normal subjects was investigated using transcranial magnetic stimulation of the motor cortex and transcutaneous magnetic stimulation of the spinal nerve root in order to obtain normative data for central and peripheral motor latencies. Under standardized conditions (site of stimulation, stimulus intensity, degree of voluntary tonic background activation) muscle compound action pote…	N		N	Healthy controls only	N		EEG-EMG-ZEITSCHRIFT FUR ELEKTROENZEPHALOGRAPHIE ELEKTROMYOGRAPHIE UND VERWANDTE GEBIETE			STUTTGART	P O BOX 30 11 20, D-70451 STUTTGART, GERMANY	0941-3790	MAR	1992	85	6	MQ010	WOS:A1993MQ01000009		No			42986
641	Knorr, S; Rice, CL; Garland, J	Perspective on neuromuscular factors in poststroke fatigue	Purpose: To summarize the potential origins of fatigue poststroke from a neuromuscular perspective, including stroke-induced alterations at the cortical, spinal and muscle levels. Method: Perspective based on narrative literature review. Results: Fatigue is a highly prevalent, but poorly understood symptom poststroke. Neuromuscular fatigue has central and peripheral origins. Individuals with stro…	N		N	Stroke	N		DISABILITY AND REHABILITATION	2012	34	26	2291	2299		10.3109/09638288.2012.683233	48	9	MR557	WOS:A1993MR55700006	7507427	No			42986
642	Kob, M; Harvey, J; Schautzer, F; Kascha, S; Bibl, D; Egg, R; Reindl, M; Berger, T; Deisenhammer, F	A novel and rapid assay for the detection of neutralizing antibodies against interferon-beta	There is evidence that neutralizing antibodies (NAB) have a negative influence on the clinical and magnetic resonance imaging effects of interferon-beta (IFNbeta) in multiple sclerosis (MS) patients. The current methods for NAB detection are restricted to specialized laboratories because they require a cell culture and sometimes a viral culture. Results are typically obtained after several weeks.…	N		N	No TMS	N		MULTIPLE SCLEROSIS JOURNAL	2003	9	1	32	35		10.1191/1352458503ms889oa	146	1	MR557	WOS:A1993MR55700007	7507428	No			42986
643	Kobayashi M., Ono Y., Shibata N., Kobayashi M., Shimizu Y., Ohta K., Iwata M., Uchiyama S.	Correlation between magnetic resonance imaging findings and pathological observations in tumefactive multiple sclerosis	Multiple sclerosis (MS) is an inflammatory demyelinating disease of the central nervous system. Tumefactive MS (TMS) is a subtype of MS characterized by solitary or multiple mass lesions with open-ring enhancement on brain magnetic resonance imaging (MRI). Three TMS cases, diagnosed histopathologically by brain biopsy, that were difficult to distinguish from brain tumors or brain abscesses on MRI…	N		N	No TMS	N		Neuroradiology Journal (2009) 22:2 (155-163). Date of Publication: April 2009								5	5
644	Kobayashi M., Shimizu Y., Shibata N., Uchiyama S.	Gadolinium enhancement patterns of tumefactive demyelinating lesions: Correlations with brain biopsy findings and pathophysiology	Tumefactive demyelinating lesions (TDLs) can mimic brain tumors on radiological images. TDLs are often referred to as tumefactive multiple sclerosis (TMS), but the heterogeneous nature and monophasic course of TDLs do not fulfill clinical and magnetic resonance imaging (MRI) criteria for multiple sclerosis. Redefining TDLs, TMS and other inflammatory brain lesions is essential for the accurate cl…	N		N	No TMS	N		Journal of Neurology (2014) 261:10 (1902-1910). Date of Publication: 1 Jan 2014							10.1007/s00415-014-7437-1	5	5	MR557	WOS:A1993MR55700009	7507430	No			42986
647	Kobayashi, M; Pascual-Leone, A	Transcranial magnetic stimulation in neurology	Transcranial magnetic stimulation (TMS) is a non-invasive tool for the electrical stimulation of neural tissue, including cerebral cortex, spinal roots, and cranial and peripheral nerves. TMS can be applied as single pulses of stimulation, pairs of stimuli separated by variable intervals to the same or different brain areas, or as trains of repetitive stimuli at various frequencies. Single stimul…	N		N		N	IRRELEVANT REVIEW	LANCET NEUROLOGY	2003	2	3	145	156		10.1016/S1474-4422(03)00321-1	31	3	MJ911	WOS:A1993MJ91100008	8286989	No			42986
650	Koch G., Mori F., Codecà C., Kusayanagi H., Monteleone F., Buttari F., Fiore S., Bernardi G., Centonze D.	Cannabis-based treatment induces polarity-reversing plasticity assessed by theta burst stimulation in humans	Background: In animal models, the cannabinoid system has been convincingly implicated in the regulation of long-lasting synaptic plasticity. Both long-term potentiation (LTP) and depression (LTD) phenomena can be induced in the human motor cortex by transcranial magnetic theta burst stimulation (TBS). Objective/Hypothesis: Here, we explored the potential involvement of the cannabinoid system in T…	N		N	No healthy control group	N		Brain Stimulation (2009) 2:4 (229-233). Date of Publication: October 2009							10.1016/j.brs.2009.03.001	15	4	MJ901	WOS:A1993MJ90100007	8138820	No			42986
652	Koch G., Rossi S., Prosperetti C., Codecà C., Monteleone F., Petrosini L., Bernardi G., Centonze D.	Improvement of hand dexterity following motor cortex rTMS in multiple sclerosis patients with cerebellar impairment	We tested the effects of 5-Hz repetitive transcranial magnetic stimulation (rTMS) over the motor cortex in multiple sclerosis (MS) subjects with cerebellar symptoms. rTMS improved hand dexterity in cerebellar patients (n = 8) but not in healthy subjects (n = 7), as detected by a significant transient reduction of the time required to complete the nine-hole pegboard task. rTMS of the motor cortex …	N	No MEP data	N	Baseline TMS data not compared	N	Baseline TMS data not compared	Multiple Sclerosis (2008) 14:7 (995-998). Date of Publication: 2008							10.1177/1352458508088710	115		MC808	WOS:A1993MC80800006	8292212	No			42986
653	Koch G., Rothwell J.C.	TMS investigations into the task-dependent functional interplay between human posterior parietal and motor cortex	Transcranial magnetic stimulation (TMS) can be used in two different ways to investigate the contribution of cortical areas involved in grasp/reach movements in humans. It can produce "virtual lesions" that interfere with activity in particular cortical areas at specific times during a task, or it can be used in a twin coil design to test the excitability of cortical projections to M1 at differen…	N		N	Healthy controls only	N		Behavioural Brain Research (2009) 202:2 (147-152). Date of Publication: 14 Sep 2009							10.1016/j.bbr.2009.03.023	85	2	LU373	WOS:A1993LU37300005	7688686	No			42986
658	Kohara N., Kaji R., Kojima Y., Kimura J.	An electrophysiological study of the corticospinal projections in amyotrophic lateral sclerosis	Objective: To elucidate the pattern of corticospinal tract involvement in patients with amyotrophic lateral sclerosis (ALS), we analyzed motor evoked potential (MEP) waveforms and their relationship to the behaviour of single motor units using the peristimulus time histogram (PSTH) technique. Methods: Abnormality of the corticospinal pathways was studied in 35 ALS patients using MEPs. PSTHs were …	N		N	ALS	N		Clinical Neurophysiology (1999) 110:6 (1123-1132). Date of Publication: 1 Jun 1999							10.1016/S1388-2457(99)00048-6	239	3	KZ601	WOS:A1993KZ60100015	8515762	No			42986
660	Kohara N., Kaji R., Kojima Y., Mills K.R., Fujii H., Hamano T., Kimura J., Takamatsu N., Uchiyama T.	Abnormal excitability of the corticospinal pathway in patients with amyotrophic lateral sclerosis: A single motor unit study using transcranial magnetic stimulation	The pathophysiology of corticospinal tract degeneration in amyotrophic lateral sclerosis (ALS) was investigated by studying the effect of transcranial magnetic stimulation on discharge characteristics of single motor units during voluntary activation. The motor units were recorded from the first dorsal interosseous muscles of 12 patients with ALS, 14 healthy subjects, 12 patients with upper motor…	N		N	ALS	N		Electroencephalography and Clinical Neurophysiology - Electromyography and Motor Control (1996) 101:1 (32-41). Date of Publication: February 1996							10.1016/0013-4694(95)00166-2	65	1-4	KZ467	WOS:A1993KZ46700007	7682929	No			42986
664	Kohl A.S., Conforto A.B., Z'Graggen W.J., Kaelin-Lang A.	An integrative transcranial magnetic stimulation mapping technique using non-linear curve fitting	The aim of this study is to develop a new simple method for analyzing one-dimensional transcranial magnetic stimulation (TMS) mapping studies in humans. Motor evoked potentials (MEP) were recorded from the abductor pollicis brevis (APB) muscle during stimulation at nine different positions on the scalp along a line passing through the APB hot spot and the vertex. Non-linear curve fitting accordin…	N		N	Healthy controls only	N		Journal of Neuroscience Methods (2006) 157:2 (278-284). Date of Publication: 30 Oct 2006							10.1016/j.jneumeth.2006.04.018	80	6	KQ666	WOS:A1993KQ66600006	8469397	No			42986
665	Kong, YZ; Eippert, F; Beckmann, CF; Andersson, J; Finsterbusch, J; Buchel, C; Tracey, I; Brooks, JCW	Intrinsically organized resting state networks in the human spinal cord	Spontaneous fluctuations in functional magnetic resonance imaging (fMRI) signals of the brain have repeatedly been observed when no task or external stimulation is present. These fluctuations likely reflect baseline neuronal activity of the brain and correspond to functionally relevant resting-state networks (RSN). It is not known however, whether intrinsically organized and spatially circumscrib…	N		N	Healthy controls only	N		PROCEEDINGS OF THE NATIONAL ACADEMY OF SCIENCES OF THE UNITED STATES OF AMERICA	2014	111	50	18067	18072		10.1073/pnas.1414293111	106	1	KK817	WOS:A1993KK81700007	8388107	No			42986
666	Kooshkabadi, A; Lunsford, LD; Tonetti, D; Flickinger, JC; Kondziolka, D	Gamma Knife thalamotomy for tremor in the magnetic resonance imaging era	Object. The surgical management of disabling tremor has gained renewed vigor with the availability of deep brain stimulation. However, in the face of an aging population of patients with increasing surgical comorbidities, noninvasive approaches for tremor management are needed. The authors' purpose was to study the technique and results of stereotactic radiosurgery performed in the era of MRI tar…	N		N	No TMS	N		JOURNAL OF NEUROSURGERY	2013	118	4	713	718		10.3171/2013.1.JNS121111	106	1	KG038	WOS:A1992KG03800002	1282454	No			42986
667	Korsholm, K; Madsen, KH; Frederiksen, JL; Skimminge, A; Lund, TE	Recovery from optic neuritis: an ROI-based analysis of LGN and visual cortical areas	Optic neuritis (ON) is the first clinical manifestation in similar to 20% of patients with multiple sclerosis (MS). The inflammation and demyelination of the optic nerve are characterized by symptomatic visual impairment and retrobulbar pain, and associated with decreased visual acuity, decreased colour and contrast sensitivity, delayed visual evoked potentials and visual field defects. Spontaneo…	N		N	Optic neuritis	N		BRAIN	2007	130		1244	1253		10.1093/brain/awm045	4	5	KG038	WOS:A1992KG03800010	1282462	No			42986
668	Korzhova I., Bakulin I., Chervyakov A., Zakharova M., Poydasheva A., Suponeva N., Piradov M.A., Krotenkova I.	Neurotransmitters changes after rTMS treatment in patients with secondaryprogressive multiple sclerosis and severe spasticity	Background: To improve our knowledge about neuroplasticity changes in patients with spasticity we used proton magnetic resonance spectroscopy (H-MRS) of motor cortex before and after navigated repetitive TMS (rTMS) of motor cortex. Introduction: Our aim was to qualify H-MRS technique in assessment of neurotransmitters changes in patients with secondary-progressive multiple sclerosis (SPMS). Metho…	N		N	No healthy control group	N		European Journal of Neurology (2017) 24 Supplement 1 (218). Date of Publication: 1 Jul 2017							10.1111/ene.13367	81	5	KA716	WOS:A1992KA71600006	1477712	No			42986
669	Korzhova I., Poydasheva A., Chervyakov A., Zakharova M.	Comparing the efficacy of different types of repetitive navigated transcranial magnetic stimulation in treatment of pharmacoresistant spasticity in patients with multiple sclerosis: 20Hz rTMS, iTBS or placebo	Background: Spasticity is a significant factor in the development of disability. Transcranial magnetic stimulation (TMS) can be a promising tool for treatment. Introduction: Our aim was to assess the efficacy of navigated repetitive TMS (rTMS) in modulating lower limb spasticity. Methods: 13 patients (6 males, 7 females, mean age 45,64 ± 11,47 years) with secondary progressive multiple sclerosis …	N		N	No healthy control group	N		European Journal of Neurology (2016) 23 SUPPL. 2 (457-458). Date of Publication: June 2016							10.1111/ene.13093	48	9	JW568	WOS:A1992JW56800008	1475046	No			42986
670	Korzhova J., Chervyakov A., Bakulin I., Zakharova M., Poydasheva A., Suponeva N., Chernikova L., Konovalov R., Zavalishin I., Piradov M.	Neuroplasticity changes after rTMS in patient with secondary-progressive multiple sclerosis and severe spacticity	Backgrounds: Transcranial magnetic stimulation (TMS) can be a promise tool for treatment farmacoresistance spasciticy in patient with secondaryprogressive multiple sclerosis (SPMS). To improve our knowledge's about repetitive TMS (rTMS) mechanisms we use proton magnetic resonance spectroscopy (H-MRS) of motor cortex. Introduction: Our aim was to assess neurotransmitters changes after navigated rT…	N		N	No healthy control group	N		Brain Stimulation (2017) 10:2 (476-477). Date of Publication: 1 Mar 2017							10.1016/j.brs.2017.01.395	54	9	JT205	WOS:A1992JT20500019	1327307	No			42986
671	Kostic, VS; Svetel, M; Dragasevic, N; Stefanova, E; Petrovic, I	Dystonia: Road to understanding movements	Dystonia or torsion dystonia refers to sustained muscle contractions that cause twisting and repetitive movements and postures. There are many causes of dystonia, including many genetic causes, and two broad etiologic categories are used. These categories are primary or idiopathic dystonia (PTD) and secondary or symptomatic dystonia. The laboratory evaluation of patients with PTD is normal; there…	N		N	Dystonia	N		NEUROBIOLOGICAL STUDIES - FROM GENES TO BEHAVIOUR 2006	2006			123	141			14	9	JT205	WOS:A1992JT20500022	1392145	No			42986
672	Kotterba S., Tegenthoff M., Malin J.-P.	Transcranial magnetic stimulation in diagnosis of trigeminal neuralgia	Patients with trigeminal neuralgia are usually investigated by elicitation of the orbicularis oculi reflex and trigeminal evoked potentials. These neurophysiological methods do not allow direct judgement of the trigeminal nerve. By transcranial magnetic stimulation, however, non-invasive investigation of the efferent part of the trigeminal nerve is possible. 10 patients (4 men, 6 women, aged from…	N		N	Trigeminal Neuralgia	N		Nervenarzt (1994) 65:4 (267-270). Date of Publication: 1994								81	4	JN834	WOS:A1992JN83400014	1407432	No			42986
676	Krushkov, H; Shotekov, P; Krampfl, K; Kossev, A	Transcranial magnetic stimulation study in patients with multiple sclerosis on 4-aminopyridine therapy	4-Aminopyridine (4-AP) - a potassium channel blocking agent is used in the symptomatic treatment of a variety of neurological disorders such as multiple sclerosis, chronic spinal cord injuries, myasthenia gravis, myasthenic syndromes etc. Its action in multiple sclerosis is supposed to be mainly by improvement of the synaptic transmission and of the nerve conduction in demyelinated nerve fibers v…	N		N	No healthy control group	N		KLINISCHE NEUROPHYSIOLOGIE	2006	37	2	133	137		10.1055/s-2006-940005	81	3	JL178	WOS:A1992JL17800005	1519005	No			42986
678	Kubsik A., Klimkiewicz R., Janczewska K., Klimkiewicz P., Jankowska A., Woldaska-Okoska M.	Application of laser radiation and magnetostimulation in therapy of patients with multiple sclerosis	BACKGROUND: Multiple sclerosis is one of the most common neurological disorders. It is a chronic inflammatory demyelinating disease of the CNS, whose etiology is not fully understood. Application of new rehabilitation methods are essential to improve functional status. OBJECTIVE: The material studied consisted of 120 patients of both sexes (82 women and 38 men) aged 21-81 years. The study involve…	N		N	No healthy control group	N		NeuroRehabilitation (2016) 38:2 (183-190). Date of Publication: 19 Mar 2016							10.3233/NRE-161309	54	6	HZ741	WOS:A1992HZ74100010	1606479	No			42986
679	Kubsik-Gidlewska A.M., Klimkiewicz P., Klimkiewicz R., Janczewska K., Woldañska-Okoñska M.	Rehabilitation in multiple sclerosis	The aim of the study is to present a strategy of rehabilitation in multiple sclerosis on the basis of the latest developments in the field of physiotherapy. The publications on the problem discuss a wide range of methods of physiotherapy that can be used in order to reduce the degree of disability and alleviate the symptoms associated with the disease. The complexity of the disease, the difficult…	N		N	No TMS	N		Advances in Clinical and Experimental Medicine (2017) 26:4 (709-715). Date of Publication: 1 Jul 2017							10.17219/acem/62329	54	6	HT430	WOS:A1992HT43000001	1373369	No			42986
680	Kułaga A., Ostrowska M., Szczudlik A.	Inter- and intrahemispheric inhibition and their role in mirror movements pathophysiology	Question: Mirror movements (MM) are unintendend and unaware movements of the limb, which remains at rest, during performing intentional movements with the contralateral one. The fibers running through corpus callosum play an important role in inhibition of contralateral hemisphere during performing unilateral motor tasks. MM occur with higher frequency in patients with pathology of corpus callosu…	N	Conference	N	Conference	N	Conference	Clinical Neurophysiology (2014) 125 SUPPL. 1 (S41). Date of Publication: June 2014								38	5	HH559	WOS:A1992HH55900010	1573419	No			42986
681	Kumru, H; Murillo, N; Samso, JV; Valls-Sole, J; Edwards, D; Pelayo, R; Valero-Cabre, A; Tormos, JM; Pascual-Leone, A	Reduction of Spasticity With Repetitive Transcranial Magnetic Stimulation in Patients With Spinal Cord Injury	Objective. Spasticity with increased tone and spasms is frequent in patients after spinal cord injury (SCI). Damage to descending corticospinal pathways that normally exert spinal segmental control is thought to play an important causal role in spasticity. The authors examined whether the modulation of excitability of the primary motor cortex with high-frequency repetitive transcranial magnetic s…	N		N	Spinal cord injury	N		NEUROREHABILITATION AND NEURAL REPAIR	2010	24	5	435	441		10.1177/1545968309356095	83	4	JK646	WOS:A1992JK64600007	1341692	No			42986
682	Kuppuswamy, A; Clark, EV; Turner, IF; Rothwell, JC; Ward, NS	Post-stroke fatigue: a deficit in corticomotor excitability?	The pathophysiology of post-stroke fatigue is poorly understood although it is thought to be a consequence of central nervous system pathophysiology. In this study we investigate the relationship between corticomotor excitability and self-reported non-exercise related fatigue in chronic stroke population. Seventy first-time non-depressed stroke survivors (60.36 +/- 12.4 years, 20 females, 56.81 +…	N		N	Stroke	N		BRAIN	2015	138		136	148		10.1093/brain/awu306	81	2	GU514	WOS:A1991GU51400002	1720722	No			42986
683	Kwon, HG; Son, SM; Jang, SH	Development of the transcallosal motor fiber from the corticospinal tract in the human brain: diffusion tensor imaging study	Transcallosal motor fiber (TCMF) plays a role in interhemispheric inhibition (IHI) between two primary motor cortices. I HI has been an important concept in development of the motor system of the brain. Many studies have focused on the research of the topography of TCMF, however, little is known about development of TCM F. In the current study, we attempted to investigate development of TCMF from…	N		N	No TMS	N		FRONTIERS IN HUMAN NEUROSCIENCE	2014	8				153	10.3389/fnhum.2014.00153	41	4	GU086	WOS:A1991GU08600004	1779235	No			42986
684	Lamontagne, A; Stephenson, JL; Fung, J	Physiological evaluation of gait disturbances post stroke	A large proportion of stroke survivors have to deal with problems in mobility. Proper evaluations must be undertaken to understand the sensorimotor impairments underlying locomotor disorders post stroke, so that evidence-based interventions can be developed. The current electrophysiological, biomechanical, and imagery evaluations that provide insight into locomotor dysfunction post stroke, as wel…	N		N	Stroke	N		CLINICAL NEUROPHYSIOLOGY	2007	118	4	717	729		10.1016/j.clinph.2006.12.013	22	1	GU086	WOS:A1991GU08600005	1779236	No			42986
685	Landi D., Vollaro S., Pellegrino G., Ghazaryan A., Mulas D., Pasqualetti P., Rossini P., Vernieri F., Filippi M.	Fingolimod modulates cortical excitability in vivo: A transcranial magnetic stimulation (TMS) longitudinal pilot study in relapsing remitting multiple sclerosis	Background: Fingolimod (FTY720) is a recently developed oral therapy for Multiple Sclerosis (MS) whose efficacy in MS is mainly due to its immunomodulatory activity on peripheral lymphocytes via sphingosine 1-phosphate receptors. Recent studies unveiled that FTY720 modulates cortical excitability and synaptic strength in Experimental autoimmune encephalomyelitis (EAE) models, by preventing and re…	N		N	No healthy control group	N		Multiple Sclerosis (2013) 19:11 SUPPL. 1 (196). Date of Publication: October 2013							10.1177/1352458513502429	76	2	GH009	WOS:A1991GH00900021	10148441	No			42986
687	Landi D., Vollaro S., Pellegrino G., Mulas D., Ghazaryan A., Falato E., Pasqualetti P., Rossini P.M., Filippi M.M.	Oral fingolimod reduces glutamate-mediated intracortical excitability in relapsing-remitting multiple sclerosis	Objective: Fingolimod is an effective disease modifying therapy for multiple sclerosis (MS). Beyond its main action on peripheral lymphocytes, several noteworthy side effects have been demonstrated in vitro, among which modulation of neural excitability. Our aim was to explore cortical excitability in vivo in patients treated with fingolimod 0.5. mg/day. Methods: Paired-pulse TMS was applied on t…	N		N	No healthy control group	N		Clinical Neurophysiology (2015) 126:1 (165-169). Date of Publication: 1 Jan 2015							10.1016/j.clinph.2014.05.031	114		GN064	WOS:A1991GN06400008	1718724	No			42986
688	Landi, D; Rossini, PM	Cerebral restorative plasticity from normal ageing to brain diseases: A "never ending story"	Brain plasticity can be considered the main result of brain communication with the 'external' and 'internal' environment. Learning new skills as well as endogenous brain function recovery following a lesion are based on neural plasticity, a dynamic phenomenon occurring in response to modification of conscious and pre- or sub-conscious experiences as they progressively stabilize at the synaptic an…	N		N	Irrelevant Review	N		RESTORATIVE NEUROLOGY AND NEUROSCIENCE	2010	28	3	349	366		10.3233/RNN-2010-0538	81	1	GF745	WOS:A1991GF74500014	1953419	No			42986
693	Lange, R; Volkmer, M; Heesen, C; Liepert, J	Modafinil effects in multiple sclerosis patients with fatigue	To investigate the effects of Modafinil on focused attention, motor function and motor excitability in patients with multiple sclerosis (MS) and fatigue. 21 MS patients with fatigue were enrolled in this double-blind placebo-controlled study. Modafinil (MOD) or placebo (PL) was administered for 8 weeks. The d2 alertness test, the Nine Hole Peg Test (9HPT) and several transcranial magnetic stimula…	N		N	No healthy control group	N		JOURNAL OF NEUROLOGY	2009	256	4	645	650		10.1007/s00415-009-0152-7	8	1	GE993	WOS:A1991GE99300004	1659616	No			42986
694	Langkilde, AR; Frederiksen, JL; Rostrup, E; Larsson, HBW	Functional MRI of the visual cortex and visual testing in patients with previous optic neuritis	The volume of cortical activation as detected by functional magnetic resonance imaging (fMRI) in the visual cortex has previously been shown to be reduced following optic neuritis (ON). In order to understand the cause of this change, we studied the cortical activation, both the size of the activated area and the signal change following ON, and compared the results with results of neuroophthalmol…	N		N	No TMS	N		EUROPEAN JOURNAL OF NEUROLOGY	2002	9	3	277	286		10.1046/j.1468-1331.2002.00399.x	438		GA303	WOS:A1991GA30300004	1720580	No			42986
695	Lanzillo, R; Di Somma, C; Quarantelli, M; Carotenuto, A; Pivonello, C; Moccia, M; Cianflone, A; Marsili, A; Puorro, G; Sacca, F; Russo, CV; Picione, CD; Ausiello, F; Colao, A; Morra, VB	Growth hormone/IGF-1 axis longitudinal evaluation in clinically isolated syndrome patients on interferon-1b therapy: stimulation tests and correlations with clinical and radiological conversion to multiple sclerosis	Background and purposeGrowth hormone (GH)/insulin-like growth factor 1 (IGF-1) axis abnormalities in multiple sclerosis (MS) suggest their role in its pathogenesis. Interferon (IFN-) efficacy could be mediated also by an increase of IGF-1 levels. A 2-year longitudinal study was performed to estimate the prevalence of GH and/or IGF-1 deficiency in clinically isolated syndrome (CIS) patients and th…	N		N	No TMS	N		EUROPEAN JOURNAL OF NEUROLOGY	2017	24	2	446	449		10.1111/ene.13207	41	1	GE404	WOS:A1991GE40400001	1714817	No			42986
696	Lappin, MS; Lawrie, FW; Richards, TL; Kramer, ED	Effects of a pulsed electromagnetic therapy on multiple sclerosis fatigue and quality of life: A double-blind, placebo controlled trial	Context . There is a growing literature on the biological and clinical effects of pulsed electromagnetic fields. Some studies suggest that electromagnetic therapies may be useful in the treatment of chronic illnesses. This study is a follow-up to a placebo controlled pilot study in which multiple sclerosis (MS) patients exposed to weak, extremely low frequency pulsed electromagnetic fields showed…	N		N	No TMS	N		ALTERNATIVE THERAPIES IN HEALTH AND MEDICINE	2003	9	4	38	48			21	4	FU517	WOS:A1991FU51700006	1710969	No			42986
697	Lascano, AM; Lalive, PH; Hardmeier, M; Fuhr, P; Seeck, M	Clinical evoked potentials in neurology: a review of techniques and indications	Evoked potentials (EPs) are a powerful and cost-effective tool for evaluating the integrity and function of the central nervous system. Although imaging techniques, such as MRI, have recently become increasingly important in the diagnosis of neurological diseases, over the past 30 years, many neurologists have continued to employ EPs in specific clinical applications. This review presents an over…	N		N	No TMS	N		JOURNAL OF NEUROLOGY NEUROSURGERY AND PSYCHIATRY	2017	88	8	688	696		10.1136/jnnp-2016-314791	19	4	FR415	WOS:A1991FR41500007	1880512	No			42986
698	Latash M.L.	Fifty years of physics of living systems	The equilibrium-point hypothesis and its more recent version, the referent configuration hypothesis, represent the physical approach to the neural control of action. This hypothesis can be naturally combined with the idea of hierarchical control of movements and of synergic organization of the abundant systems involved in all actions. Any action starts with defining trajectories of a few referent…	N		N	Irrelevant Review	N		Advances in Experimental Medicine and Biology (2016) 957 (81-103). Date of Publication: 2016							10.1007/978-3-319-47313-0_5	863		FR415	WOS:A1991FR41500008	1652623	No			42986
699	Lee, M; Reddy, H; Johansen-Berg, H; Pendlebury, S; Jenkinson, M; Smith, S; Palace, J; Matthews, PM	The motor cortex shows adaptive functional changes to brain injury from multiple sclerosis	Although multiple sclerosis (MS) is an inflammatory demyelinating disease, there can be substantial axonal injury and loss. We therefore hypothesized that adaptive cortical changes may contribute to limiting functional impairment, particularly in the early stages of the disease. To test our hypothesis, we used functional magnetic resonance imaging (MRI) to characterize the localization and volume…	N		N	No TMS	N		ANNALS OF NEUROLOGY	2000	47	5	606	613		10.1002/1531-8249(200005)47:5<606::AID-ANA8>3.0.CO;2-L	863
704	Lefaucheur J.-P., Chalah M.A., Mhalla A., Palm U., Ayache S.S., Mylius V.	The treatment of fatigue by non-invasive brain stimulation	The use of non-invasive brain neurostimulation (NIBS) techniques to treat neurological or psychiatric diseases is currently under development. Fatigue is a commonly observed symptom in the field of potentially treatable pathologies by NIBS, yet very little data has been published regarding its treatment. We conducted a review of the literature until the end of February 2017 to analyze all the stu…	N		N	Irrelevant Review	N		Neurophysiologie Clinique (2017) 47:2 (173-184). Date of Publication: 1 Apr 2017							10.1016/j.neucli.2017.03.003	66	1	FP655	WOS:A1991FP65500004	1874523	No			42986
705	Lefaucheur, JP	Transcranial magnetic stimulation: applications in neurology	Introduction. Transcranial magnetic stimulation (TMS) was first applied to assess conduction time along the corticospinal tract, namely by recording motor evoked potentials. State of art. At present, TMS techniques include cortical excitability and mapping studies using single or paired-pulse paradigms on the one hand, and repetitive TMS to induce cortical plasticity and to modify brain function …	N		N		N		REVUE NEUROLOGIQUE	2005	161	11	1121	1130			34	3-4	FE487	WOS:A1991FE48700006	1904673	No			42986
706	Lefaucheur, JP; Andre-Obadia, N; Antal, A; Ayache, SS; Baeken, C; Benninger, DH; Cantello, RM; Cincotta, M; de Carvalho, M; De Ridder, D; Devanne, H; Di Lazzaro, V; Filipovic, SR; Hummel, FC; Jaaskelainen, SK; Kimiskidis, VK; Koch, G; Langguth, B; Nyffeler, T; Oliviero, A; Padberg, F; Poulet, E; Rossi, S; Rossini, PM; Rothwell, JC; Schonfeldt-Lecuona, C; Siebner, HR; Slotema, CW; Stagg, CJ; Valls…	Evidence-based guidelines on the therapeutic use of repetitive transcranial magnetic stimulation (rTMS)	A group of European experts was commissioned to establish guidelines on the therapeutic use of repetitive transcranial magnetic stimulation (rTMS) from evidence published up until March 2014, regarding pain, movement disorders, stroke, amyotrophic lateral sclerosis, multiple sclerosis, epilepsy, consciousness disorders, tinnitus, depression, anxiety disorders, obsessive-compulsive disorder, schiz…	N		R		R		CLINICAL NEUROPHYSIOLOGY	2014	125	11	2150	2206		10.1016/j.clinph.2014.05.021	34	3-4	FL782	WOS:A1991FL78200001	1708718	No			42986
708	Leitch, JK; Figley, CR; Stroman, PW	Applying functional MRI to the spinal cord and brainstem	Functional magnetic resonance imaging of the spinal cord (spinal fMRI) has facilitated the noninvasive visualization of neural activity in the spinal cord (SC) and brainstem of both animals and humans. This technique has yet to gain the widespread usage of brain fMRI, due in part to the intrinsic technical challenges spinal fMRI presents and to the narrower scope of applications it fulfills. None…	N		N	Irrelevant Review	N		MAGNETIC RESONANCE IMAGING	2010	28	8	1225	1233		10.1016/j.mri.2010.03.032	2	8503	FG377	WOS:A1991FG37700020	2011258	No			42986
710	Lenzi D., Conte A., Mainero C., Frasca V., Fubelli F., Totaro P., Caramia F., Inghilleri M., Pozzilli C., Pantano P.	Effect of corpus callosum damage on ipsilateral motor activation in patients with multiple sclerosis: A functional and anatomical study	Functional MRI (fMRI) studies have shown increased activation of ipsilateral motor areas during hand movement in patients with multiple sclerosis (MS). We hypothesized that these changes could be due to disruption of transcallosal inhibitory pathways. We studied 18 patients with relapsing-remitting MS. Conventional T1- and T2-weighted images were acquired and lesion load (LL) measured. Diffusion …	Y		U	Demographics for controls not provided.	Y		Human Brain Mapping (2007) 28:7 (636-644). Date of Publication: July 2007							10.1002/hbm.20305
711	Lenzi D., Raz E., Pantano P.	FMRI and multiple sclerosis	The diagnosis of multiple sclerosis (MS) and the consequent therapeutic choices have been rendered considerably easier by the advent of magnetic resonance imaging; however, conventional MR images alone do not fully explain the clinical severity of MS patients; this poor correlation between clinical and radiological findings has been referred to as the clinico-radiological paradox. Histological st…	N		N	Irrelevant Review	N		Current Medical Imaging Reviews (2008) 4:3 (163-169). Date of Publication: 2008							10.2174/157340508785294507
713	Leo R.J.	Treatment considerations in neuropathic pain	Neuropathy is a relatively common source of acute and chronic pain. Emerging evidence suggests several pathophysiological mechanisms underlying the neuropathic pain associated with various disorders. Antidepressants and anticonvulsants have largely been the mainstay of treatment. Pharmacologic treatment of neuropathy frequently requires use of multiple medications. Ideally, the selection of which…	N		N	Irrelevant Review	N		Current Treatment Options in Neurology (2006) 8:5 (389-400). Date of Publication: September 2006							10.1007/s11940-006-0028-4			FN040	WOS:A1991FN04000006	1864246	No			42986
714	Leocani L., Comi G.	Electrophysiological studies of brain plasticity of the motor system	Brain plasticity, intended as the pattern of functional and structural changes in responses to environmental physiological or pathological events, is underlined by several mechanisms. Besides cortical changes such as changes in synaptic and representational patterns, morphologic and functional changes at the neuronal level have been hypothesised. Among the non-invasive techniques utilised in huma…	N		N	Irrelevant Review	N		Neurological Sciences (2006) 27:SUPPL. 1 (s27-s29). Date of Publication: March 2006							10.1007/s10072-006-0542-x			FH152	WOS:A1991FH15200001	2059424	No			42986
716	Leocani L., Formenti A., Nuara A., Rossi P., Martinelli Boneschi F., Zangen A., Comola M., Comi G.	Walking improvement after deep rTMS with H-coil associated with rehabilitation in patients with progressive multiple sclerosis: A randomised, controlled, double-blind study	Objective: To investigate whether repeated sessions of transcranial repetitive magnetic stimulation (rTMS) with H-coil could enhance the benefit of rehabilitation on walking abilities in patients with spasticity associated with multiple sclerosis (MS). Background: Impaired walking has a strong impact on disability associated with MS and its treatments options are limited. Preliminary findings sho…	N		N	No healthy control group	N		Multiple Sclerosis (2012) 18:4 SUPPL. 1 (52). Date of Publication: October 2012							10.1177/1352458512459018			FC628	WOS:A1991FC62800020	2004262	No			42986
717	Leocani L., Nuara A., Formenti A., Rossi P., Zangen A., Comola M., Comi G.	Deep rTMS with H-coil enhances improvement of walking abilities in patients with progressive multiple sclerosis undergoing rehabilitation: A randomised, placebo-ontrolled, double-blind study	Objective: To investigate whether repeated sessions of transcranial repetitive magnetic stimulation (rTMS) with H-coil could enhance the benefit of rehabilitation on walking abilities in patients with spasticity associated with multiple sclerosis (MS). Background: Impaired walking has a strong impact on disability associated with MS and its treatments options are limited. Preliminary findings sho…	N		N	No healthy control group	N		Journal of Neurology (2012) 259:1 SUPPL. 1 (S22-S23). Date of Publication: June 2012							10.1007/s00415-012-6524-4			FA301	WOS:A1991FA30100010	1705222	No			42986
720	Leocani L., Nuara A., Houdayer E., Schiavetti I., Del Carro U., Amadio S., Straffi L., Rossi P., Martinelli V., Vila C., Sormani M.P., Comi G.	Sativex(®) and clinical–neurophysiological measures of spasticity in progressive multiple sclerosis	Despite the proven efficacy of Sativex(®) (9-delta-tetrahydrocannabinol plus cannabidiol) oromucosal spray in reducing spasticity symptoms in multiple sclerosis (MS), little is known about the neurophysiological correlates of such effects. The aim of the study was to investigate the effects of Sativex on neurophysiological measures of spasticity (H/M ratio) and corticospinal excitability in patie…	N		N	No TMS	N		Journal of Neurology (2015) 262:11 (2520-2527). Date of Publication: 1 Nov 2015							10.1007/s00415-015-7878-1			EY613	WOS:A1991EY61300007	1850431	No			42986
721	Leocani, L; Colombo, B; Comi, G	Physiopathology of fatigue in multiple sclerosis	Fatigue is an overwhelming sense of tiredness or lack of energy, affecting both mental and physical domains. Fatigue is reported by about 50% of patients with multiple sclerosis (MS), and may be independent from depressed mood or weakness. Recently, the importance of distinguishing between subjective complaint and objective signs of fatigue has been emphasized, since the self-reported increase of…	N		N	Irrelevant Review	N		NEUROLOGICAL SCIENCES	2008	29		S241	S243		10.1007/s10072-008-0950-1			FY486	WOS:A1991FY48600293		No			42986
722	Leocani, L; Comi, G	Movement-related event-related desynchronization in neuropsychiatric disorders	The analysis of event-related desynchronization (ERD) and event-related synchronization (ERS) provides information on the dynamics of cortical activation during cognitive and motor tasks and has been applied in a variety of neurological and psychiatric disorders. In this chapter, we focus on studies concerning movement-related activity, which showed changes in amount, topography, or time course i…	N		N	Irrelevant Review	N		EVENT-RELATED DYNAMICS OF BRAIN OSCILLATIONS	2006	159		351	366		10.1016/S0079-6123(06)59023-5			ER633	WOS:A1991ER63300015		No			42986
724	Leonardi, N; Richiardi, J; Van De Ville, D	FUNCTIONAL CONNECTIVITY EIGENNETWORKS REVEAL DIFFERENT BRAIN DYNAMICS IN MULTIPLE SCLEROSIS PATIENTS	Resting state functional connectivity is defined as correlations in brain activity measured by functional magnetic resonance imaging without any stimulation paradigm. Such connectivity is dynamic, even over the course of minutes, and the development of tools for its analysis is an important challenge in neuroscience. We propose a novel data-driven technique to extract connectivity patterns from d…	N		N	No TMS	N		2013 IEEE 10TH INTERNATIONAL SYMPOSIUM ON BIOMEDICAL IMAGING (ISBI)	2013			528	531					EQ799	WOS:A1990EQ79900007	2127015	No			42986
725	Leon-Sarmiento F.E., Granadillo E., Bayona E.A.	Present and future of the transcranial magnetic stimulation	Magnetic stimulation has called the attention of neuroscientists and the public due to the possibility to stimulate and "control" the nervous system in a non-invasive way. It has helped to make more accurate diagnosis, and apply more effective treatments and rehabilitation protocols in several diseases that affect the nervous system. Likewise, this novel tool has increased our knowledge about com…	N		N		N	IRRELEVANT REVIEW	Investigacion Clinica (Venezuela) (2013) 54:1 (74-89). Date of Publication: 2013										ER069	WOS:A1990ER06900012	2075419	No			42986
727	Leon-Sarmiento F.E., Porras M.A.P., Deluque E.D.G.	Neurofunctional evaluation of brain stem. II. Mandibular reflex	The masseter or mandibular reflex has unique neural connections, different from those exhibited by other human monosynaptic reflexes; thus, it is useful to evaluate in an easy and efficient way the human brain stem. It is possible to elicit this reflex by using mechanical, electrical or magnetic stimulation. Several investigations have demonstrated the participation of brain stem interneurons in …	N		N	Irrelevant Review	N		Iatreia (2011) 24:3 (299-307). Date of Publication: 2011										BR83W	WOS:A1989BR83W00011		No			42986
728	Leon-Sarmiento, FE; Elfakhani, M; Boutros, NN	THE MOTOR EVOKED POTENTIAL IN AIDS AND HAM/TSP State of the evidence	Objective: We aimed to better understand the involvement of the corticospinal tract, assessed by non-invasive transcranial stimulation, in order to determine the actual involvement of the motor system in patients with HAM/TSP and AIDS. Method: An exhaustive MEDLINE search for the period of 1985 to 2008 for all articles cross-referenced for "HTLV-I, HTLV-II, HTLV-IIII and HIV, HIV1, HIV2, evoked p…	N		N	AIDS	N		ARQUIVOS DE NEURO-PSIQUIATRIA	2009	67	4	1157	1163					BR83W	WOS:A1989BR83W00068		No			42986
730	Li, JY; Lai, PH; Chen, R	Transcallosal inhibition in patients with callosal infarction	Li J-Y, Lai P-H, Chen R. Transcallosal inhibition in patients with callosal infarction. J Neurophysiol 109: 659-665, 2013. First published November 7, 2012; doi:10.1152/jn.01044.2011.-Recent studies in normal subjects suggested that callosal motor fibers pass through the posterior body of the corpus callosum (CC), but this has not been tested in patients with callosal infarction. The objective of…	N		N	Callosal Infarction	N		JOURNAL OF NEUROPHYSIOLOGY	2013	109	3	659	665		10.1152/jn.01044.2011			F5655	WOS:A1987F565500033		No			42986
731	Li, XS; Steffens, DC; Potter, GG; Guo, H; Song, S; Wang, LH	Decreased between-hemisphere connectivity strength and network efficiency in geriatric depression	White matter (WM) lesions have been recognized as a key etiological factor in geriatric depression. However, little is known about the topological pattern changes of WM in geriatric depression in the remitted state (RGD) and its relationship to depressive episodes. To address these questions, we acquired diffusion tensor images in 24 RGD and 24 healthy participants. Among them, 10 patients and 19…	N		N	Geriatric Depression	N		HUMAN BRAIN MAPPING	2017	38	1	53	67		10.1002/hbm.23343			J3734	WOS:A1987J373400002		No			42986
733	Liepert J., Kotterba S., Tegenthoff M., Malin J.-P.	Central fatigue assessed by transcranial magnetic stimulation	Central fatigue is a subjective phenomenon which can be examined using transcranial magnetic stimulation (TMS). To assess central fatigue, we compared TMS and peripheral electrical stimulations in patients with central nervous system (CNS) lesions and controls before and after an exhaustive task. The recovery times of motor evoked potential (MEP) amplitudes were significantly prolonged in the pat…	N	MS and other patients grouped (head injury, etc.)	N	Mixed sample of neurological disorders	N	Mixed sample of neurological disorders	Muscle and Nerve (1996) 19:11 (1429-1434). Date of Publication: November 1996							10.1002/(SICI)1097-4598(199611)19:11<1429::AID-MUS7>3.0.CO;2-E			J3734	WOS:A1987J373400087		No			42986
735	Liepert J., Mingers D., Heesen C., Bäumer T., Weiller C.	Motor cortex excitability and fatigue in multiple sclerosis: A transcranial magnetic stimulation study	We investigated electrophysiological correlates of fatigue in patients with multiple sclerosis (MS). Transcranial magnetic stimulation (TMS) was used to explore motor excitability in three groups of subjects: MS patients with fatigue (MS-F), MS patients without fatigue (MS-NF) and healthy control subjects. All participants had to perform a fatiguing hand-grip exercise. TMS was performed prior to …	Y		Y		Y		Multiple Sclerosis (2005) 11:3 (316-321). Date of Publication: June 2005							10.1191/1352458505ms1163oa			D6093	WOS:A1986D609300001	2874365	No			42986
736	Liepert, J; Allstadt-Schmitz, J; Weiller, C	Motor excitability and motor behaviour after modafinil ingestion - a double-blind placebo-controlled cross-over trial	Modafinil is a novel vigilance-enhancing agent. We were interested if modafinil would also enhance motor excitability and improve motor performance and attention in healthy subjects. Ten volunteers received either a single oral dose of placebo or 200 mg modafinil. A randomized double-blind crossover design was used. Transcranial magnetic stimulation was employed to test intracortical inhibition, …	N		N	Healthy controls only	N		JOURNAL OF NEURAL TRANSMISSION	2004	111	6	703	711		10.1007/s00702-004-0111-5
739	Lin X., Yu W.-Y., Liauw L., Chander R.J., Soon W.E., Lee H.Y., Tan K.	Clinicoradiologic features distinguish tumefactive multiple sclerosis from CNS neoplasms	Background: There are limited data to guide clinicians in differentiating tumefactive multiple sclerosis (TMS) from CNS neoplasms. Identifying distinguishing features will inform diagnosis and management and avoid unnecessary diagnostic biopsy. Our study aimed to determine the clinical and radiologic features that differentiate TMS from glioma and CNS lymphoma (CNSL) in patients who present with …	N		N	No TMS	N		Neurology: Clinical Practice (2017) 7:1 (53-64). Date of Publication: 1 Feb 2017							10.1212/CPJ.0000000000000319
740	Lin, KP; Lo, YC; Lin, CY; Chen, JT; Lin, YY; Lee, YC; Liao, KK	Fatigue in Colchicine Myopathy: A Study of Transcranial Magnetic Stimulation	Background: Transcranial magnetic stimulation (TMS) is a noninvasive method to assess brain physiology and plasticity. TMS has shown that nervous system excitability may be altered in myopathy, and it presents with motor disinhibition on cortical and subcortical levels. Eight patients who had colchicine myopathy were observed to have fatigue, but they did not have significant weakness. This study…	N		N	Colchicine Myopathy	N		JOURNAL OF THE CHINESE MEDICAL ASSOCIATION	2010	73	12	623	627		10.1016/S1726-4901(10)70136-2
741	Lin, TH; Spees, WM; Chiang, CW; Trinkaus, K; Cross, AH; Song, SK	Diffusion fMRI detects white-matter dysfunction in mice with acute optic neuritis	Optic neuritis is a frequent and early symptom of multiple sclerosis (MS). Conventional magnetic resonance (MR) techniques provide means to assess multiple MS-related pathologies, including axonal injury, demyelination, and inflammation. A method to directly and non-invasively probe white-matter function could further elucidate the interplay of underlying pathologies and functional impairments. P…	N		N	Optic neuritis	N		NEUROBIOLOGY OF DISEASE	2014	67		1	8		10.1016/j.nbd.2014.02.007
743	Lind H., Alevronta E., Steineck G., Waldenström A.-C., Nyberg T., Olsson C., Wilderäng U., Dunberger G., al-Abany M., Åvall-Lundqvist E.	Defecation into clothing without forewarning and mean radiation dose to bowel and anal-sphincter among gynecological cancer survivors	Background: To analyze the relationship between mean radiation dose to the bowels and the anal-sphincter and occurrence of ‘defecation into clothing without forewarning’, a specific and serious fecal incontinence symptom after gynecological radiotherapy. Additional potential risk factors associated with the symptom are explored. Material and methods: Data were collected for 519 eligible gynecolog…	N		N	Gynecological cancer	N		Acta Oncologica (2016) 55:11 (1285-1293). Date of Publication: 1 Nov 2016							10.1080/0284186X.2016.1176247
745	Linden, D	Autonomic evaluation by means of standard tests and power spectral analysis in multiple sclerosis - Reply		U		N	Letter	N		MUSCLE & NERVE			NEW YORK	605 THIRD AVE, NEW YORK, NY 10158-0012 USA	0148-639X	MAY	1998
746	Lineweaver, TT; Morris, HH; Naugle, RI; Najm, IM; Diehl, B; Bingaman, W	Evaluating the contributions of state-of-the-art assessment techniques to predicting memory outcome after unilateral anterior temporal lobectomy	Purpose: Although anterior temporal lobectomy (ATL) is an effective treatment for many patients with medically refractory temporal lobe epilepsy (TLE), one risk associated with this procedure is postsurgical decline in memory. A substantial number of past studies examined factors that predict memory decline after surgery, but few have investigated multiple predictors simultaneously or considered …	N		N	Temporal lobectomy	N		EPILEPSIA	2006	47	11	1895	1903		10.1111/j.1528-1167.2006.00807.x
747	Lippa C.F.	Head injury and neuropsychological issues		N		N	Irrelevant Review	N		American Journal of Alzheimer's Disease and other Dementias (2014) 29:3 (197-198). Date of Publication: May 2014							10.1177/1533317514531362
748	List, J; Duning, T; Meinzer, M; Kurten, J; Schirmacher, A; Deppe, M; Evers, S; Young, P; Floel, A	Enhanced Rapid-Onset Cortical Plasticity in CADASIL as a Possible Mechanism of Preserved Cognition	Ischemic small vessel disease (SVD) may lead to cognitive impairment, but cognitive deficits with a given burden of SVD vary significantly. The underlying mechanisms of impaired or preserved cognition are unknown. Here, we investigated the impact of ischemic SVD on rapid-onset cortical plasticity, as induced with a paired-associative stimulation protocol. To exclude concomitant effects of aging, …	N		N	Ischemic small vessel disease	N		CEREBRAL CORTEX	2011	21	12	2774	2787		10.1093/cercor/bhr071
749	Llufriu S., Blanco Y., Martinez-Heras E., Casanova-Molla J., Gabilondo I., Sepulveda M., Falcon C., Berenguer J., Bargallo N., Villoslada P., Graus F., Valls-Sole J., Saiz A.	Influence of Corpus callosum damage on cognition and physical disability in multiple sclerosis: A multimodal study	Background: Corpus callosum (CC) is a common target for multiple sclerosis (MS) pathology. We investigated the influence of CC damage on physical disability and cognitive dysfunction using a multimodal approach. Methods: Twenty-one relapsing-remitting MS patients and 13 healthy controls underwent structural MRI and diffusion tensor of the CC (fractional anisotropy; mean diffusivity, MD; radial di…	Y		Y		Y		PLoS ONE (2012) 7:5 Article Number: e37167. Date of Publication: 14 May 2012							10.1371/journal.pone.0037167
752	Lo, YL	The role of electrophysiology in the diagnosis and management of cervical spondylotic myelopathy	Background: Cervical spondylotic myelopathy (CSM) is managed by conservative or surgical measures. While surgery is often performed in cases of longstanding or severe CSM, there is a lack of evidence concerning its efficacy. Transcranial magnetic stimulation (TMS) is a quick, safe, painless and non-invasive technique to study conduction in the descending corticospinal pathways in the spinal cord.…	N		N	Cervical spondylarthropathy	N		ANNALS ACADEMY OF MEDICINE SINGAPORE	2007	36	11	886	893
753	Lo, YL; Chan, LL; Lim, W; Tan, SB; Tan, CT; Chen, JLT; Fook-Chong, S; Ratnagopal, P	Systematic correlation of transcranial magnetic stimulation and magnetic resonance Imaging in cervical spondylotic myelopathy	Study Design. A prospective study over a 3.5-year period involving transcranial magnetic stimulation and magnetic resonance imaging. Objectives. To assess the correlation of transcranial magnetic stimulation and magnetic resonance imaging in cervical spondylotic myelopathy qualitatively and statistically. Summary of Background Data. Cervical spondylotic myelopathy presents with different degrees …	N		N	Cervical spondylarthropathy	N		SPINE	2004	29	10	1137	1145		10.1097/00007632-200405150-00017
754	LOLLI, F; SIRACUSA, G; AMATO, MP; FRATIGLIONI, L; DALPOZZO, G; GALLI, E; AMADUCCI, L	INTRATHECAL SYNTHESIS OF FREE IMMUNOGLOBULIN LIGHT-CHAINS AND IGM IN INITIAL MULTIPLE-SCLEROSIS	We studied the intrathecal synthesis of free kappa, free lambda immunoglobulin light chains and of IgM in 33 consecutive patients with possible or probable MS at the time of their first diagnosis. Nineteen patients presented free kappa or lambda light chain bands in CSF after agarose isolectric focusing, protein transfer to nitrocellulose and immunostaining with specific antisera. Nineteen patien…	N		N	No TMS	N		ACTA NEUROLOGICA SCANDINAVICA			COPENHAGEN	35 NORRE SOGADE, PO BOX 2148, DK-1016 COPENHAGEN, DENMARK	0001-6314	APR	1991
755	López Gutiérrez I., Dinca Avarvarei L., Ramos Jiménez M.J., Rosado Peña B., Díaz Montoya B., Álvarez López M., Menéndez De Léon C.	Autoimmune demyelinating diseases of the nervous system	Introduction: Demyelinating diseases simultaneously affecting both central (CNS) and peripheral (PNS) nervous systems in the same patient are very rare, with an unknown incidence, immunopathogenesis and prognosis. Objectives: To evaluate the clinical profile and complementary studies in a patient with autoimmune demyelinating disease affecting both CNS and PNS, in an attempt to contribute to its …	N		N	No healthy control group	N		Clinical Neurophysiology (2011) 122 SUPPL. 1 (S140). Date of Publication: June 2011							10.1016/S1388-2457(11)60499-9
756	Lou, JS	Physical and Mental Fatigue in Parkinson's Disease Epidemiology, Pathophysiology and Treatment	Fatigue is one of the most common non-motor complaints of Parkinson's disease (PD) patients and is associated with reduced activity and poorer quality of life. Fatigue can be experienced as a state of being tired or weary (subjective fatigue) or as a process of becoming tired or fatigued (fatigability). Subjective mental and physical fatigue are evaluated using self-report questionnaires such as …	N		N	Parkinson's Disease	N		DRUGS & AGING	2009	26	3	195	208
757	MacKe A., LePorte A., Clark B.C.	Social, societal, and economic burden of mal de debarquement syndrome	Mal de debarquement syndrome (MdDS) is a disorder of phantom perception of self-motion of unknown cause. The purpose of this work was to describe the quality of life (QOL) of patients with MdDS and to estimate the economic costs associated with this disorder. A modified version of a QOL survey used for another neurological disease (multiple sclerosis; MSQOL-54) was used to assess the impact of Md…	N		N	Mal de debarquement syndrome	N		Journal of Neurology (2012) 259:7 (1326-1330). Date of Publication: July 2012							10.1007/s00415-011-6349-6
760	Maertens De Noordhout A.	Cortical magnetic stimulation	In the last decade, a new electrophysiological tool has become available since the development of painless magnetic stimulators able to activate the primary motor cortex and the motor roots in conscious man. Therefore, it became possible to measure the conduction time within fast-conducting central motor pathways by substracting from the total latency of muscle responses elicited by cortical stim…	N		N		N		Neurophysiologie Clinique (1998) 28:1 (9-30). Date of Publication: February 1998							10.1016/S0987-7053(97)89575-5
762	Maertens de Noordhout A., Rothwell J.C., Day B.L., Thompson P.D., Delwaide P.J., Marsden C.D.	Percutaneous electrical and magnetic stimulation of the human motor cortex. Physiological data and clinical applications	The new techniques of percutaneous electric and magnetic stimulation of the motor cortex in conscious man provide a unique opportunity of functional testing of the central motor pathways. Theses techniques seem to be safe and no immediate or delayed adverse reactions have been reported. The physiological studies so far performed suggest that the structures which are preferentially excited by thes…	N		N		N		Revue Neurologique (1989) 145:1 (1-15). Date of Publication: 1989
764	Magistris, MR; Rosler, KM	The triple stimulation technique to study corticospinal conduction		N		N	Healthy controls only	N		TRANSCRANIAL MAGNETIC STIMULATION AND TRANSCRANIAL DIRECT CURRENT STIMULATION	2003	56		24	32
765	Magistris, MR; Rosler, KM; Truffert, A; Landis, T; Hess, CW	A clinical study of motor evoked potentials using a triple stimulation technique	Amplitudes of motor evoked potentials (MEPs) are usually much smaller than those of motor responses to maximal peripheral nerve stimulation, and show marked variation between normal subjects and from one stimulus to another. Consequently, amplitude measurements have low sensitivity to detect central motor conduction failures due to the broad range of normal values, Since these characteristics are…	N		N	Healthy controls only	N		BRAIN			OXFORD	GREAT CLARENDON ST, OXFORD OX2 6DP, ENGLAND	0006-8950	FEB	1999
766	Magistris, MR; Rosler, KM; Truffert, A; Myers, JP	Transcranial stimulation excites virtually all motor neurons supplying the target muscle - A demonstration and a method improving the study of motor evoked potentials	Transcranial stimulation has become an established method in the evaluation of corticospinal tract function. Clinical studies mainly address slowing of conduction through measurement of increased central conduction time (CCT) and failures' of conduction through observation of marked reductions in the size of the motor evoked potential (MEP). While CCT is of great interest in detecting subclinical…	N		N	Healthy controls only	N		BRAIN			OXFORD	GREAT CLARENDON ST, OXFORD OX2 6DP, ENGLAND	0006-8950	MAR	1998
767	Magnano, I; Pes, GM; Pilurzi, G; Cabboi, MP; Ginatempo, F; Giaconi, E; Tolu, E; Achene, A; Salis, A; Rothwell, JC; Conti, M; Deriu, F	Exploring brainstem function in multiple sclerosis by combining brainstem reflexes, evoked potentials, clinical and MRI investigations	Objective: To investigate vestibulo-masseteric (VMR), acoustic-masseteric (AMR), vestibulo-collic (VCR) and trigemino-collic (TCR) reflexes in patients with multiple sclerosis (MS); to relate abnormalities of brainstem reflexes (BSRs) to multimodal evoked potentials (EPs), clinical and Magnetic Resonance Imaging (MRI) findings. Methods: Click-evoked VMR, AMR and VCR were recorded from active mass…	N		N	No TMS	N		CLINICAL NEUROPHYSIOLOGY	2014	125	11	2286	2296		10.1016/j.clinph.2014.03.016
768	Mahboobi N., Nolden-Hoverath S., Rieker O., Bauer H.	Multiple sclerosis presenting as a delirium: A case report	Objective: To report a case of multiple sclerosis (MS) with delirium as the first presentation. Clinical Presentation and Intervention: A 34-year-old female was referred to our department with an acute onset of drowsiness, withdrawal from routine activities and aggression, followed by neurologic deficits after a couple of days. Clinical and radiographic examinations were performed, leading to the…	N		N	No TMS	N		Medical Principles and Practice (2015) 24:4 (388-390). Date of Publication: 2015							10.1159/000430446
771	Mainero C., Inghilleri M., Pantano P., Conte A., Lenzi D., Frasca V., Bozzao L., Pozzilli C.	Enhanced brain motor activity in patients with MS after a single dose of 3,4-diaminopyridine	Background: 3,4-Diaminopyridine (3,4-DAP), a potassium (K(+)) channel blocker, improves fatigue and motor function in multiple sclerosis (MS). Although it was thought to do so by restoring conduction to demyelinated axons, recent experimental data show that aminopyridines administered at clinical doses potentiate synaptic transmission. Objective: To investigate motor cerebral activity with fMRI a…	N		N	No healthy control group	N		Neurology (2004) 62:11 (2044-2050). Date of Publication: 8 Jun 2004
773	Majcher, K; Tomanek, B; Jasinski, A; Foniok, T; Stroman, PW; Tuor, UI; Kirk, D; Hess, G	Simultaneous functional magnetic resonance imaging in the rat spinal cord and brain	Functional magnetic resonance imaging (fMRI) method was developed to investigate the pattern and temporal relationship in neuronal pathways of brain and spinal cord. Signal intensity changes correlating with stimulation patterns were observed simultaneously in the rat spinal cord and brain using fMRI at 9.4 T. Electrical stimulation of the forepaw was used to elicit activity. A quadrature volume …	N		N	Animal model	N		EXPERIMENTAL NEUROLOGY	2006	197	2	458	464		10.1016/j.expneurol.2005.10.012
774	Makary M.S., Kirsch C.F.	Tumefactive demyelinating disease with isolated spinal cord involvement	Tumefactive multiple sclerosis (TMS) is an unusual variant of demyelinating disease. TMS has a variable and unknown progression and presents with features similar to a neoplasm making the determination a diagnostic challenge to clinicians. This report presents one of the very few reported cases of isolated spinal cord TMS, and the second case to describe TMS of the lower spinal cord, given that t…	N		N	No TMS	N		Acta Radiologica Short Reports (2014) 3:5. Date of Publication: 2014							10.1177/2047981614539324
775	Mandolesi, G; Gentile, A; Musella, A; Fresegna, D; De Vito, F; Bullitta, S; Sepman, H; Marfia, GA; Centonze, D	Synaptopathy connects inflammation and neurodegeneration in multiple sclerosis	Multiple sclerosis (MS) has long been regarded as a chronic inflammatory disease of the white matter that leads to demyelination and eventually to neurodegeneration. In the past decade, several aspects of MS pathogenesis have been challenged, and degenerative changes of the grey matter, which are independent of demyelination, have become a topic of interest. CNS inflammation in MS and experimenta…	N		N	No TMS	N		NATURE REVIEWS NEUROLOGY	2015	11	12				10.1038/nrneurol.2015.222
776	Manfredi, L; Garavaglia, P; Beretta, S; Pellegrini, G	Increased cortical inhibition induced by apomorphine in patients with Parkinson's disease	The electromyographic silent period following the motor potential evoked by cortical magnetic stimulation is decreased in parkinsonian patients. In this study we investigated whether the decrease in the silent period is connected only with parkinsonian symptoms. We evaluated the effect of apomorphine (a potent and rapid dopamine-agonist) on the changes in the peripheral and central silent period …	N		N	Parkinson's Disease	N		NEUROPHYSIOLOGIE CLINIQUE-CLINICAL NEUROPHYSIOLOGY			PARIS CEDEX 15	23 RUE LINOIS, 75724 PARIS CEDEX 15, FRANCE	0987-7053	FEB	1998
777	Manogaran P., Borich M., Vavasour I., Zakeri M., Kim R., Kuan A., Kolind S., Boyd L., McKay A., Li D., Traboulsee A.	Assessing conductivity in the cortical-spinal pathway using motor evoked potentials in multiple sclerosis and neuromyelitis optica patients	OBJECTIVE: To examine the validity of using MEP to measure neurophysiologic function of central motor conduction time in MS and NMO patients. BACKGROUND: Multiple sclerosis (MS) could affect conduction speed by focal demyelination along the pathway and/or diffuse damage throughout the normal appearing white matter. Transcranial magnetic stimulation allows measurement of centrally evoked motor evo…	N		N	No healthy control group	N		Neurology (2013) 80:1 MeetingAbstracts. Date of Publication: 12 Feb 2013
778	Manogaran P., Vavasour I., Borich M., Kolind S.H., Lange A.P., Rauscher A., Boyd L., Li D.K.B., Traboulsee A.	Corticospinal tract integrity measured using transcranial magnetic stimulation and magnetic resonance imaging in neuromyelitis optica and multiple sclerosis	Background: Both multiple sclerosis (MS) and neuromyelitis optica (NMO) can present with transverse myelitis; however, NMO symptoms are usually more severe and may present with more extensive axonal loss. Transcranial magnetic stimulation (TMS)-based input-output recruitment curves can quantitatively assess the excitability of corticospinal tract pathways and myelin water imaging can quantify the…	N	criteria? No official diagnoses	N	MS not defined by neurologist or established criteria	N	MS not defined by neurologist or established criteria	Multiple Sclerosis (2016) 22:1 (43-50). Date of Publication: 1 Jan 2016							10.1177/1352458515579441
782	Manson, SC; Palace, J; Frank, JA; Matthews, PM	Loss of interhemispheric inhibition in patients with multiple sclerosis is related to corpus callosum atrophy	Axonal injury and loss in the corpus callosum (CC) is characteristic of the pathology of multiple sclerosis (MS). Functional magnetic resonance imaging (fMRI) potentially allows neurophysiological consequences of this interhemispheric axonal loss to be defined quantitatively. Here we have used 3T fMRI to study the activation in the contralateral primary sensorimotor cortex and deactivation (media…	N		N	No TMS	N		EXPERIMENTAL BRAIN RESEARCH	2006	174	4	728	733		10.1007/s00221-006-0517-4
783	Marsden, J; Harris, C	Cerebellar ataxia: pathophysiology and rehabilitation	This series of articles for rehabilitation in practice aims to cover a knowledge element of the rehabilitation medicine curriculum. Nevertheless they are intended to be of interest to a multidisciplinary audience. The competency addressed in this article is 'The trainee consistently demonstrates a knowledge of management approaches for specific impairments including spasticity, ataxia.'	N		N	Cerebellar ataxia	N		CLINICAL REHABILITATION	2011	25	3	195	216		10.1177/0269215510382495
784	Martin, MB; Menor, MC; Abreu, IC; Gomez, JC; Sanchez, RG	Utility of auditory middle latency response in patients with Multiple Sclerosis relapsing-remitting type	A prospective study was carried out to establish the utility of Auditory Middle Latency Response (AMLR) in the evaluation of patients with relapsing-remitting multiple sclerosis. Twenty subjects were evaluated with the multimodal battery of auditory, visual and somatosensory evoked potentials, AMLR, and motor evoked potential by transcraneal magnetic stimulation. The results showed the following …	N		N	No healthy control group	N		REVISTA ECUATORIANA DE NEUROLOGIA	2007	16	2	69	76
786	Martin-Trias, P; Bragulat, V; Pena-Gomez, C; Sala-Llonch, R; Lanteaume, L; Casse-Perrot, C; Blin, O; Micallef, J; Auffret, A; Bartres-Faz, D	Translational Challenge Models in Support of Efficacy Studies: Neurobehavioral and Cognitive Changes Induced by Transcranial Magnetic Stimulation in Healthy Volunteers	Transcranial Magnetic Stimulation (TMS) was proposed as a neurophysiological tool almost three decades ago. It now encompasses a very wide range of applications including clinical research and the treatment of psychiatric, neurologic and medical conditions such as depression, schizophrenia, addictions, post-traumatic stress disorders, pain, migraine, stroke, Alzheimer's disease, autism, multiple …	N		N	Irrelevant Review	N		CNS & NEUROLOGICAL DISORDERS-DRUG TARGETS	2016	15	7	802	815		10.2174/1871527315666160518124316
787	Marz-Loose, H; Siemes, H	Repetitive peripheral magnetic stimulation. Treatment option for spasticity?	Background. In an open study the effect of repetitive peripheral magnetic stimulation (RPMS) on the spastic talipes equinus of varyious origins, degree and duration was evaluated in 53 children and adolescents. Study design and methods. Clinical and electrophysiological investigations were designed to measure the RMPS effect on the spasticity and the functional capabilities of the spastic talipes…	N		N	Irrelevant Review	N		NERVENARZT	2009	80	12	1489	1495		10.1007/s00115-009-2835-9
790	Mastaglia, FL	The relationship between muscle pain and fatigue	Pain and fatigue may occur together during sustained exhausting muscle contractions, particularly as the limit of endurance is approached, and both can restrict muscle performance. Patients with neuromuscular disorders may have chronic myofascial pain (e.g. fibromyalgia) or contraction-induced pain (e.g. in metabolic myopathies). In some patients these two types of pain may coexist and both may i…	N		N	Irrelevant Review	N		NEUROMUSCULAR DISORDERS	2012	22		S178	S180		10.1016/j.nmd.2012.10.003
791	Mastronardi, FG; Moscarello, MA	Molecules affecting myelin stability: A novel hypothesis regarding the pathogenesis of multiple sclerosis	In this Mini-Review we present a new hypothesis in support of the neurodegenerative theory as a mechanism for the pathogenesis of multiple sclerosis (MS). The pathogenesis of MS results from changes in two distinct CNS compartments. These are the "myelin" and "nonmyelin" compartments. The myelin compartment is where primary demyelination, amidst attempts at remyelination, is superseded in the CNS…	N		N	No TMS	N		JOURNAL OF NEUROSCIENCE RESEARCH	2005	80	3	301	308		10.1002/jnr.20420
792	MASUR, H; PAPKE, K; OBERWITTLER, C	SUPPRESSION OF VISUAL-PERCEPTION BY TRANSCRANIAL MAGNETIC STIMULATION - EXPERIMENTAL FINDINGS IN HEALTHY-SUBJECTS AND PATIENTS WITH OPTIC NEURITIS	The influence of noninvasive magnetic brain stimulation by a magnetic coil (MC) placed over the occiput on perception and correct reporting of a briefly presented set of 3 letters of the alphabet was examined in 15 patients with prolonged VEP latencies due to neuritis of the optic nerve. The results derived from observing these patients were compared to the results obtained from an age-matched co…	N		N	Optic neuritis	N		ELECTROENCEPHALOGRAPHY AND CLINICAL NEUROPHYSIOLOGY			CLARE	CUSTOMER RELATIONS MANAGER, BAY 15, SHANNON INDUSTRIAL ESTATE CO, CLARE, IRELAND	0013-4694	APR	1993
793	Mathis, J; Hess, CW	Motor-evoked potentials from multiple target muscles in multiple sclerosis and cervical myelopathy	Motor-evoked potentials (MEP) from abductor digiti minimi (ADM), biceps brachii (BE) and tibialis anterior (TA) muscle were analysed in 101 patients with multiple sclerosis (MS) and in 72 patients with compressive cervical myelopathy (CM). In definite MS the results were abnormal in 82% and in probable or possible MS in 64% of patients. In CM results were abnormal in 56% when the compression site…	N		N	No healthy control group	N		EUROPEAN JOURNAL OF NEUROLOGY			HOBOKEN	111 RIVER ST, HOBOKEN 07030-5774, NJ USA	1351-5101	NOV	1996
794	Matsumoto H., Chiba S., Imai T., Nonaka M., Hisahara S.	Introduction of current research activities in neurology department	Our main research interests have been focused on (1) phrenic nerve conduction velocity in transient phrenic nerve palsy after cardiopulmonary surgery and age-related changes; the palmar cutaneous branch of the median nerve in carpal tunnel syndrome; and transcranial magnetic stimulation study on neck flexion to detect the prognosis in Hirayama disease, (2) non-invasive respiratory care using volu…	N		N	Irrelevant Review	N		Sapporo Medical Journal (2004) 73:4-6 (27-30). Date of Publication: Dec 2004
795	Matsunaga K., Uozumi T., Tsuji S., Murai Y.	Sympathetic skin responses evoked by magnetic stimulation of the neck	We studied sympathetic skin responses (SSRs) following magnetic stimulation of the neck in 40 normal subjects and 54 patients with neurological diseases and active sweat gland densities (ASGDs) at the foot induced by pilocarpine in 39 patients. SSRs at the hand following magnetic stimulation showed the lowest coefficients of variability of the latencies and:amplitudes in eight consecutive respons…	N		N	No TMS	N		Journal of the Neurological Sciences (1995) 128:2 (188-194). Date of Publication: 1995							10.1016/0022-510X(94)00221-9
798	Matthews P.M.	The virtues of adaptability		N		N	Irrelevant Review	N		Multiple Sclerosis Journal (2014) 20:4 (394-396). Date of Publication: April 2014							10.1177/1352458513516690
799	Matthews P.M.	Measuring brain function in multiple sclerosis	Functional pathology in MS is the hidden “endophenotype” mediating the relationship between structural brain changes and clinical expression of disease. I propose that distinguishable concepts of interest are the functional pathologies associated with: i. adaptation to neuronal injury and loss contributing to their relative dissociation from the progression of clinical expression of the disease a…	N		N		N	NO TMS	Multiple Sclerosis (2015) 23:11 SUPPL. 1 (58). Date of Publication: September 2015							10.1177/1352458515602640
801	Matthews P.M., Johansen-Berg H., Reddy H.	Non-invasive mapping of brain functions and brain recovery: Applying lessons from cognitive neuroscience to neurorehabilitation	Modern cognitive neuroscience provides a powerful framework in which biological models of recovery and neurorehabilitation can be constructed and tested. The widespread availability, relatively low cost and informativeness of functional magnetic resonance imaging (fMRI) has made it the most popular of the techniques available to help with this task. Here, on the basis of functional imaging studie…	N		N	No TMS	N		Restorative Neurology and Neuroscience (2004) 22:3-5 (245-260). Date of Publication: 2004
804	Matz K., Brainin M.	Editorial: Neurostimulation in ischaemic stroke - Down with the healthy hemisphere!		N		N	Editorial	N		European Journal of Neurology (2009) 16:12 (1253-1254). Date of Publication: December 2009							10.1111/j.1468-1331.2009.02785.x
807	Mayr N., Baumgartner C., Zeitlhofer J., Deecke L.	The sensitivity of transcranial cortical magnetic stimulation in detecting pyramidal tract lesions in clinically definite multiple sclerosis	We determined central motor conduction time (CMCT) (motor cortex to root C-8 and motor cortex to root S-1) as well as the amplitude of the compound muscle action potentials in the hypothenar and the abductor hallucis muscles on both sides in 44 patients with definite MS. We compared the values with standards obtained from 86 healthy controls and correlated them with the degree of clinical deficit…	N	Short results - no clinical measures	N	No clinical measures	N	No clinical measures	Neurology (1991) 41:4 (566-569). Date of Publication: 1991
809	McCombe P.A., Gordon T.P., Jackson M.W.	Bladder dysfunction in multiple sclerosis	Multiple sclerosis (MS) is a relatively common disease of young adults. Patients with MS can have a wide range of symptoms and may develop significant disability. The cause of MS is unknown, but immunological mechanisms are important. In MS, the pathological features include prominent demyelination and inflammation, but there is also evidence of neurodegeneration. Bladder symptoms are common in M…	N		N	Irrelevant Review	N		Expert Review of Neurotherapeutics (2009) 9:3 (331-340). Date of Publication: March 2009							10.1586/14737175.9.3.331
812	McDonald W.M., Greenberg B.D.	Electroconvulsive therapy in the treatment of neuropsychiatric conditions and transcranial magnetic stimulation as a pathophysiological probe in neuropsychiatry	It is a challenging task to review transcranial magnetic stimulation (TMS) studies in neuropsychiatric disorders alongside assessments of longstanding clinical applications of ECT as an empirical treatment. The task is challenging because TMS was developed as a probe of neural mechanisms, whereas, in marked contrast, ECT has been a clinical technique from its inception. Since the onset of modern …	N		N	Irrelevant Review	N		Depression and Anxiety (2000) 12:3 (135-143). Date of Publication: 2000							10.1002/1520-6394(2000)12:3<135::AID-DA5>3.0.CO;2-4
813	McDonald, JW; Becker, D; Sadowsky, CL; Jane, JA; Conturo, TE; Schultz, LM	Late recovery following spinal cord injury - Case report and review of the literature	The authors of this prospective, single-case study evaluated the potential for functional recovery from chronic spinal cord injury (SCI). The patient was motor complete with minimal and transient sensory perception in the left hemibody. His condition was classified as C-2 American Spinal Injury Association (ASIA) Grade A and he had experienced no substantial recovery in the first 5 years after tr…	N		N	Spinal cord injury	N		JOURNAL OF NEUROSURGERY	2002	97	2	252	265		10.3171/spi.2002.97.2.0252
814	McGregor, KM; Nocera, JR; Sudhyadhom, A; Patten, C; Manini, TM; Kleim, JA; Crosson, B; Butler, AJ	Effects of aerobic fitness on aging-related changes of interhemispheric inhibition and motor performance	Physical Fitness has been long associated with maintenance and improvement of motor performance as we age. In particular, measures of psychomotor speed and motor dexterity tend to be higher in physically fit aging adults as compared to their sedentary counterparts. Using functional magnetic resonance imaging and transcranial magnetic stimulation, we explored the patterns of neural activity that m…	N		N	Healthy controls only	N		FRONTIERS IN AGING NEUROSCIENCE	2013	5					10.3389/fnagi.2013.00066
815	McMonagle-Strucko K., Ji Z., Petty M., Liu L., Zhang D., Hanak S., Iglesias-Bregna D.	Effects of prophylactic teriflunomide in transcranial magnetic stimulation-induced motor evoked potentials in the DA-rat model of experimental autoimmune encephalomyelitis	Background: Teriflunomide is an oral immunomodulatory compound currently in Phase III studies for the treatment of Multiple Sclerosis (MS). Teriflunomide treatment has been reported to delay onset and progression of experimental autoimmune encephalomyelitis (EAE) in the Dark Agouti (DA) rat model of MS. Electro- physiological studies have also demonstrated that teriflunomide preserves conduction …	N		N	Animal model	N		Multiple Sclerosis (2011) 17:10 SUPPL. 1 (S234). Date of Publication: October 2011							10.1177/1352458511422300
816	Meaney A., Collett J., Dawes H., Howells K., Izadi H.	Consistency of evoked responses to dual-stimulator, single-pulse transcranial magnetic stimulation in the lower limb of people with multiple sclerosis	The purpose of this study was to explore the within session and test-retest consistency of motor evoked potentials (MEP) elicited by transcranial magnetic stimulation (TMS) from the resting tibialis anterior (TA) muscle of 10 patients (two men, eight women) with clinically definite multiple sclerosis (MS). Dual stimulators were configured to produce a single pulse (DS/SP) through a hand-held coil…	N		N	No healthy control group	N		Journal of Clinical Neuroscience (2015) 22:9 (1434-1437). Date of Publication: 2015							10.1016/j.jocn.2015.02.034
819	Medina F.J., Túnez I.	Huntington's disease: The value of transcranial meganetic stimulation	Huntington's disease (HD) is a genetic neurodegenerative process whose etiology is based on a localized disturbance in the short arm of chromosome 4 that encodes the huntingtin protein (Htt). The elongation of triple CAG for glutamine characterizes this change. Mutated Htt (mHtt) causes the appearance of intracellular aggregates inducing alterations in mitochondrial metabolism in the form of reac…	N		N	Huntington's disease	N		Current Medicinal Chemistry (2010) 17:23 (2482-2491). Date of Publication: 2010							10.2174/092986710791556078
822	Medina-Fernandez F.J., Escribano B.M., Agüera E., Aguilar-Luque M., Feijoo M., Luque E., Garcia-Maceira F.I., Pascual-Leone A., Drucker-Colin R., Tunez I.	Effects of transcranial magnetic stimulation on oxidative stress in experimental autoimmune encephalomyelitis	Experimental autoimmune encephalomyelitis (EAE) reproduces a multiple sclerosis (MS)-like experimental model. The main objective was to evaluate the effect of extremely low-frequency electromagnetic fields (EL-EMF) application, like a paradigm of transcranial magnetic stimulation (TMS) in the development of EAE. Rats were injected with a single dose of 150 μg of myelin oligodendrocyte glycoprotei…	N		N	Animal model	N		Free Radical Research (2017) 51:5 (460-469). Date of Publication: 4 May 2017							10.1080/10715762.2017.1324955
826	Medina-Fernandez, FJ; Luque, E; Aguilar-Luque, M; Aguera, E; Feijoo, M; Garcia-Maceira, FI; Escribano, BM; Pascual-Leone, A; Drucker-Colin, R; Tunez, I	Transcranial magnetic stimulation modifies astrocytosis, cell density and lipopolysaccharide levels in experimental, autoimmune encephalomyelitis	Aims: Experimental autoimmune encephalomyelitis (EAE) is considered a valid experimental model for multiple sderosis, a chronic neuroinflammatory condition of the central nervous system. Additionally, some evidence has shown that some microbial products such as the bacterial lipopolysaccharide could lead to the activation reactive immune cells, triggering neuroinflammation. Several studies have f…	N		N	Animal model	N		LIFE SCIENCES	2017	169		20	26		10.1016/j.lfs.2016.11.011
828	Mehanna R., Jankovic J.	Movement disorders in multiple sclerosis and other demyelinating diseases	Multiple sclerosis is an autoimmune inflammatory demyelinating disease of the central nervous system characterized by dissemination of the lesions in time and space. While tremor is frequently seen in patients with multiple sclerosis, other movement disorders such as parkinsonism, dystonia, chorea, ballism, paroxysmal dystonia, paroxysmal chorea, myoclonus, tourettism, restless leg syndrome and h…	N		N	Irrelevant Review	N		Journal of the Neurological Sciences (2013) 328:1-2 (1-8). Date of Publication: 15 May 2013							10.1016/j.jns.2013.02.007
829	MEINCKE, U; FERBERT, A	BLINK REFLEX IN PATIENTS WITH AN ISCHEMIC LESION OF THE BRAIN-STEM VERIFIED BY MRI	The electrically elicited blink reflex was investigated in 25 patients with ischaemic lesions of the pons or the medulla oblongata. Only patients with a lesion on MRI appropriate to the clinical syndrome were included. Twenty patients had an infarction of the pons, bilateral in 5. Additional 5 patients had an infarction of the dorsolateral medulla oblongata. Patients with hemispheric lesions were…	N		N	Ischemic lesions	N		JOURNAL OF NEUROLOGY			NEW YORK	175 FIFTH AVE, NEW YORK, NY 10010	0340-5354	NOV	1993
830	Mercado, R; Mandat, T; Moore, GRW; Li, D; MacKay, A; Honey, CR	Three-tesla magnetic resonance imaging of the ventrolateral thalamus: a correlative anatomical description	Object. Surgery for tremor targets the ventrolateral nuclei of the thalamus. An initial radiological estimation of this target can be further refined through intraoperative physiological confirmation. Direct visualization of these nuclei has not yet been described. The improved signal-to-noise ratio associated with 3-tesla (3T) magnetic resonance (MR) imaging makes increased spatial resolution po…	N		N	No TMS	N		JOURNAL OF NEUROSURGERY	2006	105	2	279	283		10.3171/jns.2006.105.2.279
831	Merkulov Y.A., Merkulova D.M., Iosifova O.A., Zavalishin I.A.	Axonopathy in the pathogenesis of multiple sclerosis, peripheral diffuse and local motor neuropathies and motor neuron disease	Two hundreds and seventy-six patients including 43 patients with multiple sclerosis, 24 - with acute inflammatory demyelinating polyneuropathy (AIDP), 144 - with chronic inflammatory demyelinating polyneuropathy (CIDP), 27 - with motor multifocal neuropathy (MMN), 38 - with lateral amyotrophic sclerosis (LAS) have been examined. Symptoms of axonal degeneration, manifested in denervation phenomena…	N		N	No healthy control group	N		Zhurnal Nevrologii i Psihiatrii imeni S.S. Korsakova (2010) 110:8 (4-7). Date of Publication: 2010
834	MEYER, B; ZENTNER, J	MOTOR EVOKED-POTENTIALS BY ELECTRICAL AND ELECTROMAGNETIC STIMULATION - SIGNIFICANCE AND COMPARISON OF BOTH METHODS	Motor evoked potentials (MEP) were recorded in a total of 145 patients with supratentorial (N = 29), infratentorial (N = 25) and spinal (N = 91) lesions affecting the descending pathways. In all cases potentials were evoked by electrical, in addition in 55 of them by electromagnetic stimulation of the motor cortex. The peripheral conduction time was determined in all patients by electrical stimul…	N		N	Lesions	N		EEG-EMG-ZEITSCHRIFT FUR ELEKTROENZEPHALOGRAPHIE ELEKTROMYOGRAPHIE UND VERWANDTE GEBIETE		Meyer, Bernhard/Q-9413-2016	STUTTGART	P O BOX 30 11 20, D-70451 STUTTGART, GERMANY	0941-3790	DEC	1990
835	Michalovicz, LT; Lally, B; Konat, GW	Peripheral challenge with a viral mimic upregulates expression of the complement genes in the hippocampus	Peripheral challenge with a viral mimetic, polyinosinic-polycytidylic acid (PIC) induces hippocampal hyperexcitability in mice. Here, we characterized this hippocampal response through a whole genome transcriptome analysis. Intraperitoneal injection of PIC resulted in temporal dysregulation of 625 genes in the hippocampus, indicating an extensive genetic reprogramming. The bioinformatics analysis…	N		N	Animal model	N		JOURNAL OF NEUROIMMUNOLOGY	2015	285		137	142		10.1016/j.jneuroim.2015.06.003
836	Michels R., Wessel K., Klohn S., Kompf D.	Long-latency reflexes, somatosensory evoked potentials and transcranial magnetic stimulation: Relation of the three methods in multiple sclerosis	Afferent and efferent central pathways were tested by electrically elicited long-latency reflexes (LLRs), somatosensory evoked potentials (SEPs), and motor potentials (MEPs) evoked by transcranial magnetic stimulation (TMS) in 37 patients with multiple sclerosis. Of these 27 (72.9%) had abnormal results, with bilateral abnormalities in 17 (45.9%). MEPs were abnormal in 21 (56.8%), LLRs in 17 (45.…	N		N	No healthy control group	N		Electroencephalography and Clinical Neurophysiology - Electromyography and Motor Control (1993) 89:4 (235-241). Date of Publication: 1993
839	Midaglia L., Fraga A., Rodriguez Acevedo B., Lion S., Ribeiro S., Dieguez C., Fontanillo M., Muñoz García D.	Repetitive transcranial magnetic stimulation in refractory spasticity treatment in patients with multiple sclerosis	Background: Multiple sclerosis (MS) is the second largest cause of moderate/severe disabilities in individuals between 20-50 years of age. Spasticity is a common disabling symptom with a prevalence of up to 84%, mainly affecting the flexor muscles (upper extremities) and extensor muscles (lower extremities), which consequently produced alterations in walking pattern and functional capacity. Repet…	N		Y		N	NO HC	Multiple Sclerosis (2013) 19:11 SUPPL. 1 (279-280). Date of Publication: October 2013							10.1177/1352458513502429
841	Mignarri, A; Rossi, S; Ballerini, M; Gallus, GN; Del Puppo, M; Galluzzi, P; Federico, A; Dotti, MT	Clinical relevance and neurophysiological correlates of spasticity in cerebrotendinous xanthomatosis	Cerebrotendinous xanthomatosis (CTX) is a rare neurometabolic disease due to defective activity of sterol 27-hydroxylase, with plasma and tissue cholestanol storage. Clinical phenotype is characterized by both systemic manifestations and neurological signs. Therapy with chenodeoxycholic acid (CDCA) suppresses abnormal bile acid synthesis. The purpose of the study was to assess the frequency and c…	N		N	Cerebrotendinous xanthomatosis	N		JOURNAL OF NEUROLOGY	2011	258	5	783	790		10.1007/s00415-010-5829-4
842	MIKI, A; NAKAJIMA, T; FUJITA, M; WATANABE, H; KUWABARA, T; NARUSE, S; TAKAGI, M; ABE, H	FUNCTIONAL MAGNETIC-RESONANCE-IMAGING OF THE PRIMARY VISUAL-CORTEX - EVALUATION OF HUMAN AFFERENT VISUAL-SYSTEM	The authors evaluated signal changes in the human primary visual cortex during visual stimulation using functional magnetic resonance imaging (fMRI) with a conventional gradient-echo magnetic resonance imaging (MRI) scanner at 1.5 Tesla. Experiments were performed on 10 normal volunteers and 2 patients with homonymous hemianopsia. In the normal volunteers, a signal increase was observed on the bi…	N		N	No TMS	N		JAPANESE JOURNAL OF OPHTHALMOLOGY			HONGO TOKYO	UNIV TOKYO-SCH MED DEPT OPHTHALMOLOGY, HONGO TOKYO 113, JAPAN	0021-5155		1995
843	Mills K.R., Boniface S.J., Schubert M.	Origin of the secondary increase in firing probability of human motor neurons following transcranial magnetic stimulation: Studies in healthy subjects, type I hereditary motor and sensory neuropathy and multiple sclerosis	In tonically active human motor neurons serving upper limb muscles there is a late rise in firing probability following transcranial magnetic stimulation termed the secondary peak (SP). The aim was to study the mechanism of SP and the pathway that mediates it. For this purpose, the response to transcranial magnetic stimulation of 62 repetitively firing low threshold single motor units from upper …	N	No clinical data (EDSS); motor unit	N	Single motor unit	N	Single motor unit	Brain (1991) 114:6 (2451-2463). Date of Publication: 1991
845	Mills K.R., Nithi K.A.	Corticomotor threshold to magnetic stimulation: Normal values and repeatability	The threshold for corticomotor excitation by magnetic stimuli is a clinically important parameter in the assessment of central motor conduction. Hitherto, arbitrary criteria have been adopted to define threshold and there are few published data using a figure of eight coil. A new method is described in which the highest stimulus intensity evoking responses in the relaxed first dorsal interosseous…	N		N	Healthy controls only	N		Muscle and Nerve (1997) 20:5 (570-576). Date of Publication: 1997							10.1002/(SICI)1097-4598(199705)20:5<570::AID-MUS5>3.0.CO;2-6
847	Mills, KR	Magnetic brain stimulation: a review after 10 years experience		N		N	Irrelevant Review	N		FUNCTIONAL NEUROSCIENCE: EVOKED POTENTIALS AND MAGNETIC FIELDS			AMSTERDAM	SARA BURGERHARTSTRAAT 25, PO BOX 211, 1000 AE AMSTERDAM, NETHERLANDS			1999
848	MILLS, KR	MAGNETIC BRAIN-STIMULATION - A TOOL TO EXPLORE THE ACTION OF THE MOTOR CORTEX ON SINGLE HUMAN SPINAL MOTONEURONS	The human brain can be stimulated by a single intense magnetic pulse over the scalp. Currents induced within the cranium excite the motor cortex and cause limb muscles to contract. The discharge of single motor units, the firing of which is maintained by voluntary effort, can be modulated by magnetic stimuli. Peri-stimulus time histograms suggest that after a cortical stimulus spinal montoneurone…	N		N		N	SINGLE MOTOR UNIT	TRENDS IN NEUROSCIENCES			OXFORD	THE BOULEVARD, LANGFORD LANE, KIDLINGTON, OXFORD, OXON, ENGLAND OX5 1GB	0166-2236	SEP	1991
851	Minagawa, T; Saitou, T; Suzuki, T; Domen, T; Yokoyama, H; Ishikawa, M; Hirakata, S; Nagai, T; Nakazawa, M; Ogawa, T; Ishizuka, O	Impact of ao-dake-humi, Japanese traditional bamboo foot stimulator, on lower urinary tract symptoms, constipation and hypersensitivity to cold: a single-arm prospective pilot study	Background: Ao-dake-humi is a traditional Japanese bamboo foot stimulator consisting of a half-pipe-shaped step made of bamboo used to stimulate the foot by stepping on it, and is commonly used to promote general health among the elderly in Japan. However, its efficacy has not been reported in the scientific literature. This study was performed to investigate the role of ao-dake-humi focusing on …	N		N	Lower urinary tract symptoms	N		BMC COMPLEMENTARY AND ALTERNATIVE MEDICINE	2016	16				513	10.1186/s12906-016-1494-1
852	Miscio G., Guastamacchia G., Priano L., Baudo S., Mauro A.	Are the neurophysiological techniques useful for the diagnosis of diaphragmatic impairment in multiple sclerosis (MS)?	Objective: To characterize cortico-diaphragmatic pathway involvement in multiple sclerosis (MS) by means of transcranial magnetic stimulation (TMS), and verify its clinical impact. Methods: TMS from diaphragm (Dia), and abductor digiti minimi (AbdV°) was performed in 26 MS patients. Phrenic nerve (PN) conduction study was also performed. Expanded disability status scale (EDSS) and fatigue descrip…	N		N	No healthy control group	N		Clinical Neurophysiology (2003) 114:1 (147-153). Date of Publication: 1 Jan 2003							10.1016/S1388-2457(02)00339-5
855	Miscio, G; Pisano, F; Mora, G; Mazzini, L	Motor neuron disease: usefulness of transcranial magnetic stimulation in improving the diagnosis	Clinical upper motor neuron (UMN) involvement is sometimes difficult to detect in motor neuron disease (MND). For this reason we performed transcranial magnetic stimulation (TMS) to find out whether this technique may be useful in revealing signs of pyramidal tract impairment. Fifty-five MND patients, clinically divided into 22 amyotrophic lateral sclerosis (ALS), 18 ALS with probable UMN signs (…	N		N	ALS	N		CLINICAL NEUROPHYSIOLOGY			CLARE	CUSTOMER RELATIONS MANAGER, BAY 15, SHANNON INDUSTRIAL ESTATE CO, CLARE, IRELAND	1388-2457	MAY	1999
856	Misra, UK; Kalita, J; Kumar, S	A clinical, MRI and neurophysiological study of acute transverse myelitis	There is paucity of studies correlating the MRI and evoked potential changes in acute transverse myelitis (ATM). We studied ten patients with ATM (age range 14-57 years; 8 men, 2 women) who were subjected to clinical. MRI and neurophysiological evaluation. The latter included median and tibial somatosensory evoked potentials (SEP) motor evoked potentials (MEP) to upper and lower limbs and concent…	N		N	Acute transverse myelitis	N		JOURNAL OF THE NEUROLOGICAL SCIENCES			AMSTERDAM	PO BOX 211, 1000 AE AMSTERDAM, NETHERLANDS	0022-510X	JUN	1996
857	MISRA, UK; SHARMA, VP	PERIPHERAL AND CENTRAL CONDUCTION STUDIES IN NEUROLATHYRISM	To study the involvement of motor and sensory pathways in neurolathyrism, 19 patients with lathyrism from Unnao, India, where lathyrism is endemic, were studied. The mean age of the patients at the time of the onset of illness was 35.8 (range 18-70) years. The mean duration of illness was 15.6 (range 2-30) years. The clinical picture comprised walking difficulty due to stiffness and mild weakness…	N		N	Neurolathyrism	N		JOURNAL OF NEUROLOGY NEUROSURGERY AND PSYCHIATRY			LONDON	BRITISH MED ASSOC HOUSE, TAVISTOCK SQUARE, LONDON, ENGLAND WC1H 9JR	0022-3050	MAY	1994
858	Mistry S., Michou E., Rothwell J., Hamdy S.	Remote effects of intermittent theta burst stimulation of the human pharyngeal motor system	Intermittent theta burst stimulation (iTBS) is a novel, non-invasive form of brain stimulation capable of facilitating excitability of the human primary motor cortex with therapeutic potential in the treatment of neurological conditions, such as multiple sclerosis. The objectives of this study were to evaluate the effects of iTBS on cortical properties in the human pharyngeal motor system. Transc…	N		N	Healthy controls only	N		European Journal of Neuroscience (2012) 36:4 (2493-2499). Date of Publication: August 2012							10.1111/j.1460-9568.2012.08157.x
861	Mjaset, C; Russell, MB	Secondary chronic cluster headache due to trigeminal nerve root compression	A 50-year-old woman had a gradual onset of chronic headache located in the right temporal region and a burning sensation in the root of the tongue which over a year evolved into chronic cluster headache with a milder chronic headache in-between the severe cluster headache attacks. A cerebral magnetic resonance imaging (MRI) showed vascular compression of the trigeminal nerve root on the pain side…	N		N	Chronic headache	N		ACTA NEUROLOGICA SCANDINAVICA	2010	122	6	373	376		10.1111/j.1600-0404.2010.01322.x
862	Monninghoff, C; Ladd, ME; Forsting, M	7-Tesla-MRI in Neuroradiology Possibilities and Perspectives		N		N	Irrelevant Review	N		NERVENHEILKUNDE	2013	32	7	485	492
863	Montano, N; Conforti, G; Di Bonaventura, R; Meglio, M; Fernandez, E; Papacci, F	Advances in diagnosis and treatment of trigeminal neuralgia	Various drugs and surgical procedures have been utilized for the treatment of trigeminal neuralgia (TN). Despite numerous available approaches, the results are not completely satisfying. The need for more contemporaneous drugs to control the pain attacks is a common experience. Moreover, a number of patients become drug resistant, needing a surgical procedure to treat the neuralgia. Nonetheless, …	N		N	Trigeminal Neuralgia	N		THERAPEUTICS AND CLINICAL RISK MANAGEMENT	2015	11		289	299		10.2147/TCRM.S37592
864	Morgante F., Dattola V., Crupi D., Russo M., Rizzo V., Ghilardi M.F., Terranova C., Girlanda P., Quartarone A.	Is central fatigue in multiple sclerosis a disorder of movement preparation?	We tested the hypothesis that fatigue in MS is related to a dysfunction in cortical areas involved in movement preparation. Thirty-three patients with clinically definite MS (16 with fatigue MS-F, 17 without fatigue MS-NF) and a relapsing-remitting course, matched for disease severity and duration, disability scores and level of depression were enrolled. They underwent a combined assessment with …	Y		U	Demographics for controls not provided.	Y		Journal of Neurology (2011) 258:2 (263-272). Date of Publication: February 2011							10.1007/s00415-010-5742-x
867	Mori F., Codecà C., Kusayanagi H., Monteleone F., Boffa L., Rimano A., Bernardi G., Koch G., Centonze D.	Effects of intermittent theta burst stimulation on spasticity in patients with multiple sclerosis	Background and purpose: Spasticity is a common disorder and a major cause of long-term disability in patients with multiple sclerosis (MS). Our aim was to evaluate whether a recently developed repetitive transcranial magnetic stimulation protocol, the intermittent theta burst stimulation (iTBS) is effective in modulating lower limb spasticity in MS patients. Methods: Twenty MS patients were pseud…	N		N	No healthy control group	N		European Journal of Neurology (2010) 17:2 (295-300). Date of Publication: February 2010							10.1111/j.1468-1331.2009.02806.x
869	Mori F., Koch G., Foti C., Bernardi G., Centonze D.	The use of repetitive transcranial magnetic stimulation (rTMS) for the treatment of spasticity	Spasticity is a common disorder in patients with injury of the brain and spinal cord, especially in patients affected by multiple sclerosis (MS). In MS, spasticity is a major cause of long-term disability, it significantly impacts daily activities and quality of life and is only partially influenced by traditional spasmolytic drugs. Transcranial magnetic stimulation (TMS) is a noninvasive tool th…	N		N		N	IRRELEVANT REVIEW	Progress in Brain Research (2009) 175 (429-439). Date of Publication: 2009							10.1016/S0079-6123(09)17528-3
871	Mori F., Kusayanagi H., Buttari F., Centini B., Monteleone F., Nicoletti C.G., Bernardi G., Di Cantogno E.V., Marciani M.G., Centonze D.	Early treatment with high-dose interferon beta-1a reverses cognitive and cortical plasticity deficits in multiple sclerosis	Acute inflammation is associated with cognitive deficits and alterations of cortical plasticity in multiple sclerosis (MS). We tested whether early treatment with high-dose interferon (IFN) beta-1a, known to reduce inflammatory activity, improves cortical function and cognitive deficits in MS. Eighty treatment-naïve relapsing-remitting MS (RRMS) patients received IFN beta-1a (44 mcg) subcutaneous…	N		N	No healthy control group	N		Functional Neurology (2012) 27:3 (163-168). Date of Publication: July-September 2012
873	Mori F., Kusayanagi H., Buttari F., Nicoletti C.G., Bernardi G., Centonze D.	Glatiramer acetate reverses plasticity and cognitive deficits associated with acute inflammation in MS	Objective: Evaluating the effects of Glatiramer acetate (GA) therapy on inflammation, cognitive performance and synaptic plasticity in MS. Background Cognitive dysfunction is frequent in multiple sclerosis (MS). It is associated with gray matter pathology, brain atrophy, and altered connectivity. Recent evidence showed that acute inflammation alters amyloid-beta metabolism reducing its concentrat…	N		N	No healthy control group	N		Neurology (2012) 78:1 Meeting Abstract. Date of Publication: 22 Apr 2012							10.1212/WNL.78.1
874	Mori F., Kusayanagi H., Monteleone F., Moscatelli A., Nicoletti C.G., Bernardi G., Centonze D.	Short interval intracortical facilitation correlates with the degree of disability in multiple sclerosis	Background: The Expanded Disability Status Scale (EDSS) is the most widely used measure of disability in MS, however because of its limitations surrogate markers of clinical disability progression are of high interest. Transcranial magnetic stimulation (TMS) measures of demyelination and cortical excitability correlate with disability levels in MS. Objective: Aim of this study was testing whether…	N		N	No healthy control group	N		Brain Stimulation (2013) 6:1 (67-71). Date of Publication: January 2013							10.1016/j.brs.2012.02.001
876	Mori F., Kusayanagi H., Nicoletti C.G., Weiss S., Marciani M.G., Centonze D.	Cortical plasticity predicts recovery from relapse in multiple sclerosis	Background: Relapsing-remitting multiple sclerosis (RRMS) is characterized by the occurrence of clinical relapses, followed by remitting phases of a neurological deficit. Clinical remission after a relapse can be complete, with a return to baseline function that was present before, but is sometimes only partial or absent. Remyelination and repair of the neuronal damage do contribute to recovery, …	N		N	No healthy control group	N		Multiple Sclerosis (2014) 20:4 (451-457). Date of Publication: 1 Apr 2014							10.1177/1352458513512541
881	Mori F., Ljoka C., Magni E., Codecà C., Kusayanagi H., Monteleone F., Sancesario A., Bernardi G., Koch G., Foti C., Centonze D.	Transcranial magnetic stimulation primes the effects of exercise therapy in multiple sclerosis	Exercise therapy (ET) can be beneficial in disabled multiple sclerosis (MS) patients. Intermittent transcranial magnetic theta burst stimulation (iTBS) induces long-term excitability changes of the cerebral cortex and may ameliorate spasticity in MS. We investigated whether the combination of iTBS and a program of ET can improve motor disability in MS patients. In a double-blind, sham-controlled …	N		N	No healthy control group	N		Journal of Neurology (2011) 258:7 (1281-1287). Date of Publication: July 2011							10.1007/s00415-011-5924-1
882	Mori F., Ljoka C., Nicoletti C.G., Kusayanagi H., Buttari F., Giordani L., Rossi S., Foti C., Centonze D.	CB1 receptor affects cortical plasticity and response to physiotherapy in multiple sclerosis	Objectives: Therapeutic effects of physical therapy in neurologic disorders mostly rely on the promotion of use-dependent synaptic plasticity in damaged neuronal circuits. Genetic differences affecting the efficiency of synaptic plasticity mechanisms could explain why some patients do not respond adequately to the treatment. It is known that physical exercise activates the endo-cannabinoid system…	N		N	No healthy control group	N		Neurology: Neuroimmunology and NeuroInflammation (2014) 1:4 Article Number: e48. Date of Publication: 1 Dec 2014							10.1212/NXI.0000000000000048
883	Mori F., Nicoletti C.G., Rossi S., Motta C., Kusayanagi H., Bergami A., Studer V., Buttari F., Barbieri F., Weiss S., Nisticò R., Martino G., Furlan R., Centonze D.	Growth factors and synaptic plasticity in relapsing-remitting multiple sclerosis	During multiple sclerosis (MS) inflammatory attacks, and in subsequent clinical recovery phases, immune cells contribute to neuronal and oligodendroglial cell survival and tissue repair by secreting growth factors. Animal studies showed that growth factors also play a substantial role in regulating synaptic plasticity, and namely in long-term potentiation (LTP). LTP could drive clinical recovery …	N		N	No healthy control group	N		NeuroMolecular Medicine (2014) 16:2 (490-498). Date of Publication: June 2014							10.1007/s12017-014-8297-7
886	Mori F., Nisticò R., Mandolesi G., Piccinin S., Mango D., Kusayanagi H., Berretta N., Bergami A., Gentile A., Musella A., Nicoletti C.G., Nicoletti F., Buttari F., Mercuri N.B., Martino G., Furlan R., Centonze D.	Interleukin-1β promotes long-term potentiation in patients with multiple sclerosis	The immune system shapes synaptic transmission and plasticity in experimental autoimmune encephalomyelitis (EAE), the mouse model of multiple sclerosis (MS). These synaptic adaptations are believed to drive recovery of function after brain lesions, and also learning and memory deficits and excitotoxic neurodegeneration; whether inflammation influences synaptic plasticity in MS patients is less cl…	N		N	No healthy control group	N		NeuroMolecular Medicine (2014) 16:1 (38-51). Date of Publication: March 2014							10.1007/s12017-013-8249-7
887	Mori F., Nisticò R., Nicoletti C.G., Zagaglia S., Mandolesi G., Piccinin S., Martino G., Finardi A., Rossini P.M., Marfia G.A., Furlan R., Centonze D.	RANTES correlates with inflammatory activity and synaptic excitability in multiple sclerosis	Background: Alterations of synaptic transmission induced by inflammatory activity have been linked to the pathogenic mechanisms of multiple sclerosis (MS). Regulated upon activation, normal T-cell expressed, and secreted (RANTES) is a pro-inflammatory chemokine involved in MS pathophysiology, potentially able to regulate glutamate release and plasticity in MS brains, with relevant consequences on…	N		N	No healthy control group	N		Multiple Sclerosis (2016) 22:11 (1405-1412). Date of Publication: 1 Oct 2016							10.1177/1352458515621796
888	Mori F., Rossi S., Piccinin S., Motta C., Mango D., Kusayanagi H., Bergami A., Studer V., Nicoletti C.G., Buttari F., Barbieri F., Mercuri N.B., Martino G., Furlan R., Nisticò R., Centonze D.	Synaptic plasticity and PDGF signaling defects underlie clinical progression in multiple sclerosis	Neuroplasticity is essential to prevent clinical worsening despite continuing neuronal loss in several brain diseases, including multiple sclerosis (MS). The precise nature of the adaptation mechanisms taking place in MS brains, ensuring protection from disability appearance and accumulation, is however unknown. Here, we explored the hypothesis that long-term synaptic potentiation (LTP), potentia…	N		N	No healthy control group	N		Journal of Neuroscience (2013) 33:49 (19112-19119). Date of Publication: 2013							10.1523/JNEUROSCI.2536-13.2013
890	Mori F., Rossi S., Sancesario G., Codecá C., Mataluni G., Monteleone F., Buttari F., Kusayanagi H., Castelli M., Motta C., Studer V., Bernardi G., Koch G., Bernardini S., Centonze D.	Cognitive and cortical plasticity deficits correlate with altered amyloid-Β CSF levels in multiple sclerosis	Cognitive dysfunction is of frequent observation in multiple sclerosis (MS). It is associated with gray matter pathology, brain atrophy, and altered connectivity, and recent evidence showed that acute inflammation can exacerbate mental deficits independently of the primary functional system involved. In this study, we measured cerebrospinal fluid (CSF) levels of amyloid-Β 142 and protein in MS an…	N		N	No healthy control group	N		Neuropsychopharmacology (2011) 36:3 (559-568). Date of Publication: February 2011							10.1038/npp.2010.187
893	Mori, F; Codeca, C; Kusayanagi, H; Monteleone, F; Buttari, F; Fiore, S; Bernardi, G; Koch, G; Centonze, D	Effects of Anodal Transcranial Direct Current Stimulation on Chronic Neuropathic Pain in Patients With Multiple Sclerosis	Neuropathic pain in patients with MS is frequent and is associated with a great interference with daily life activities. In the present study, we investigated whether anodal transcranial direct current stimulation (tDCS) may be effective in reducing central chronic pain in MS patients. Patients received sham tDCS or real tDCS in a 5-day period of treatment in a randomized, double blind, sham-cont…	N		N	No TMS	N		JOURNAL OF PAIN	2010	11	5	436	442		10.1016/j.jpain.2009.08.011
900	Mori, F; Nistico, R; Mandolesi, G; Piccinin, S; Mango, D; Kusayanagi, H; Berretta, N; Bergami, A; Gentile, A; Musella, A; Nicoletti, CG; Nicoletti, F; Buttari, F; Mercuri, NB; Martino, G; Furlan, R; Centonze, D	Interleukin-1 beta Promotes Long-Term Potentiation in Patients with Multiple Sclerosis	The immune system shapes synaptic transmission and plasticity in experimental autoimmune encephalomyelitis (EAE), the mouse model of multiple sclerosis (MS). These synaptic adaptations are believed to drive recovery of function after brain lesions, and also learning and memory deficits and excitotoxic neurodegeneration; whether inflammation influences synaptic plasticity in MS patients is less cl…	N		N	Animal model	N		NEUROMOLECULAR MEDICINE	2014	16	1	38	51		10.1007/s12017-013-8249-7
904	Morita, H; Olivier, E; Baumgarten, J; Petersen, NT; Christensen, LOD; Nielsen, JB	Differential changes in corticospinal and Ia input to tibialis anterior and soleus motor neurones during voluntary contraction in man	Motor-evoked potentials (MEPs) were recorded in the tibialis anterior and soleus muscles following transcranial magnetic stimulation (TMS) of the motor cortex. In the soleus, the H-reflex amplitude increased with the contraction level to the same extent as that of MEPs, whereas in the tibialis anterior, the H-reflex amplitude increased significantly less than that of MEPs. The latency of the MEPs…	N		N	Healthy controls only	N		ACTA PHYSIOLOGICA SCANDINAVICA	2000	170	1	65	76		10.1046/j.1365-201x.2000.00762.x
905	Moschou M., Kimiskidis V., Notas K., Haidich A.-B., Orologas A.	The effect of repetitive transcranial magnetic stimulation on spasticity: A meta-analysis of randomized controlled trials	Background and aims: Spasticity is a common feature and major cause of long-term disability in various neurological disorders. Small-scale clinical trials reported that repetitive transcranial magnetic stimulation (rTMS) may improve spasticity. However, its' efficacy has not been conclusively proved. Accordingly, the objective of this study is to perform a meta-analysis of trials exploring the ef…	N		N		N	IRRELEVANT REVIEW	European Journal of Neurology (2017) 24 Supplement 1 (66). Date of Publication: 1 Jul 2017							10.1111/ene.13366
906	Moseley, ME; deCrespigny, A; Spielman, DM	Magnetic resonance imaging of human brain function	BACKGROUND Previously the exclusive domain of the technology of positron emission tomography, functional MRI is now proving capable of mapping functional regions of the human cortex in near real time during specific task activations or in response to any hemodynamic stress. Of particular interest is the opportunity to observe secondary cortical responses, activation due to imagined tasks, memory …	N		N	Irrelevant Review	N		SURGICAL NEUROLOGY			NEW YORK	655 AVENUE OF THE AMERICAS, NEW YORK, NY 10010	0090-3019	APR	1996
907	MULLER, K; HOMBERG, V; AULICH, A; LENARD, HG	MAGNETOELECTRICAL STIMULATION OF MOTOR CORTEX IN CHILDREN WITH MOTOR DISTURBANCES	Transcranial magnetoelectrical stimulation (TMS) is now widely used as a diagnostic tool in adults. In this study we report our experiences with this technique in children with central motor disturbances. We used a Cadwell MES10 magnetoelectrical stimulator with a maximal magnetic field of 2 tesla. The stimulation procedure followed a standardized protocol, with the patients being as relaxed as p…	N		N	Pediatric motor disturbances	N		ELECTROENCEPHALOGRAPHY AND CLINICAL NEUROPHYSIOLOGY			CLARE	CUSTOMER RELATIONS MANAGER, BAY 15, SHANNON INDUSTRIAL ESTATE CO, CLARE, IRELAND	0013-4694	APR	1992
[truncated: 455 more rows]
