# Supplementary material for: Transcranial Magnetic Stimulation as a Potential Biomarker in Multiple Sclerosis: A Systematic Review with Recommendations for Future Research
Source: Neural Plast. 2019 Sep 16;2019:6430596. doi: 10.1155/2019/6430596 (PMC6766108; doi:10.1155/2019/6430596)
Supplement: Supplementary Materials — Figure S1: key potential confounding variable findings. In-depth descriptions of the TMS and clinical outcomes employed in reviewed studies can be found in Tables S1 and S2, respectively. See Tables S3 and S4 for results pertaining to article screening and data extraction, respectively. Original review protocol can be found in Supplemental Methods 1-2. [file 6430596.f1.zip › Supplemental Table S4 - Data Extraction.xlsx]

## Sheet: Table5
Authors	Number of MS Participants	Number of RRMS	Number of Progressive MS	Number of Female MS Participants	Age of MS Participants (yr)	EDSS	MS Diagnostic Criteria	MS Disease Duration (yr)	MS Disease-modifying Therapy	Number of HC Participants	Number of Female HC Participants	Age of HC Participants (yr)	MS Clinical Measures (Disease Severity, Motor, Cognitive, Fatigue)	MS+HC Clinical Measures (Motor, Cognitive, Fatigue)	TMS Target	TMS Coil Type	TMS Measures	Significant TMS Findings	Significant Clinical Findings	Significant Clinical:TMS Correlations
Bridoux et al. 2015	12	11	SPMS: n = 1	9	M = 44.0, SEM = 3.0	M = 2.5, SD = 1.5	2010 Revised McDonald (Polman et al. 2011)	NA	Glatiramer Acetate: n = 3 Interferon-β: n = 6, Methotrexate: n = 1 Natalizumab: n = 1, No Treatment: n = 1	12	6	M = 37, SEM = 3	EDSS	FSS	Non-dominant M1 (APB)	C, Diameter = 11 cm	Resting: MEP Amplitude (Absolute)	↓ MEP Amplitude in MS vs. HC (p = 0.03)	↑ FSS in MS vs. HC (p = 0.0003)	NA
Codecà et al. 2010	36	RRMS Without Disability: n = 18, RRMS With Disability: n = 18	0	19	RRMS Without Disability: M = 33.7, SD = 7.4, RRMS With Severe Diability: M = 42.1, SD = 7.0	RRMS Without Disability: M = 0.4, SD = 0.6, RRMS With Disability: M = 3.8, SD = 1.3	McDonald (McDonald et al. 2001)	RRMS Without Disability: M = 8.4, SD = 5.8, RRMS With Disability: M = 8.6, SD = 7.7	Azathioprine: n = 6, Glatiramer Acetate: n = 6, Interferon-β: n = 34, Mitoxantrone: n = 4, Natalizumab: n = 7	12	Sex-matched to MS	Age-matched to MS	EDSS	NA	R-M1 (FDI), L-PMd	M1: F8, Diameter = 5.5 cm, PMd: F8, Diameter = 7 cm	Resting: PMd-M1 Inhibition (%TS), PMd-M1 Facilitation (%TS), SICI (%TS), LICI (%TS), SICF (%TS), ICF (%TS)	↓PMd-M1 Facilitation in RRMS With and Without Disability vs. HC (p < 0.05), ↑ PMd-M1 Inhibition in RRMS With Disability vs. HC (p < 0.05)	NA	NS (p > 0.05)
Conte et al. 2016	25	RRMS Without Fatigue: n = 13, RRMS With Fatigue: n = 12	0	13	RRMS Without Fatigue: M = 38.3, SD = 8.4, RRMS With Fatigue: M = 41.3, SD = 7.7	RRMS Without Fatigue: Median = 1.1, Range = 0.0-3.5, RRMS With Fatigue: Median = 1.0, Range = 0.0-3.5	2010 Revised McDonald (Polman et al. 2011)	RRMS Without Fatigue: M = 6.3, SD = ± 7.1, RRMS With Fatigue: M = 5.2, SD = 4.3	Not Specified: n = 25	18	9	M = 37.0, SD = 8.0	EDSS, FAB, MSFC, MFIS, MFIS-physical, MFIS-cognitive, MFIS-social, SRT-LTS, SRT-CLTR, SRT-D, SPART, SPART-D, SDMT, PASAT-3, WLG, Stroop Test	Posner Test	L-M1 (FDI, APB)	F8, Diameter = NA	Resting: MEP Amplitude (Absolute)	↓ FDI MEP Amplitude in MS vs. HC (p = 0.03), ↓ APB MEP Amplitude in MS vs. HC (p = 0.004)	↑ MFIS in RRMS With Fatigue vs. RRMS Without Fatigue (p = 0.00003), ↑ MFIS-physical in RRMS With Fatigue vs. RRMS Without Fatigue (p < 0.000001)	NS (p > 0.05)
Cucurachi et al. 2008	20	16	SPMS: n = 4	16	M = 43.9, SD = 10.7	M = 3.1, SD = 1.7	2005 Revised McDonald (Polman et al. 2005)	M = 8.5, SD = 7.0	Azathioprine: n = 6, Glatiramer Acetate: n = 1, Interferon-β: n = 10, Methotrexate: n = 1, Mitoxantrone: n = 4, No Treatment: n = 4	20	Sex-matched to MS	Age-matched to MS	EDSS, SRT-LTS, SRT-CLTR, SRT-D, SPART, SPART-D, SDMT, PASAT-3, PASAT-2, WLG	NA	R-M1 (FDI)	RMT, MEP, CMCT: C, Diameter = 12 cm, SAI: F8, Diameter = 9 cm	Resting: RMT (%MSO), MEP Amplitude (%Mmax), CMCT (ms), SAI (CS/TS)	↓ SAI in MS vs. HC (p = 0.03)	NA	SRT-LTS:SAI in MS (ρ = 0.75, p = 0.0001), SRT-CLTR:SAI in MS (ρ = 0.70, p = 0.0005), SRT-D:SAI in MS (ρ = 0.59, p = 0.006)
Facchetti et al. 1997	53	40	SPMS: n = 13	40	RRMS: M = 36.0, SD = 10.0, SPMS: M = 40.0, SD = 7.4	RRMS: M = 1.6, SD = 1.1, SPMS: M = 5.1, SD = 1.3	Poser (Poser et al. 1983)	RRMS: M = 8.1, SD = 7.5, SPMS: M = 11.8, SD = 5.8	NA	20	10	M = 30.1, SD = 5.5	EDSS, Kurtzke FSS	NA	Bilateral M1 (ADM)	NA	Active: MEP Abnormalities, CMCT (ms)	↑ MEP Abnormalities in SPMS vs. RRMS (p < 0.01), ↑ CMCT in RRMS vs. HC (p < 0.05), ↑ CMCT in SPMS vs. HC (p < 0.001), ↑ CMCT in SPMS vs. RRMS (p < 0.05)	↑ EDSS in SPMS vs. RRMS (p < 0.001), ↑ Kurtzke Pyramidal in SPMS vs. RRMS (p < 0.001)	NS (p > 0.05)
Firmin et al. 2012	16	10	Not Specified: n = 6	7	RRMS: M = 36.2, Range = 21.0-47.0, Progressive MS: M = 48.5, Range = 31.0-60.0	RRMS: M = 2.9, Range = 0.0-6.0, Progressive MS: M = 6.3, Range = 5.0-7.0	2005 Revised McDonald (Polman et al. 2005)	RRMS: M = 6.6, Range = 0.5-14.0, Progressive MS: M = 9.2, Range = 4.0-17.0	NA	29	15	M = 25.0, Range = 21.0-31.0	EDSS	NA	R-M1 (ADM)	C, Diameter = NA	Active: MEP Latency (ms), CMCT (ms), TST Latency, TST Latency Variability	↑ TST Latency in MS vs. HC (p ≤ 0.02), ↑ TST Latency Variability in RRMS vs. HC (p < 0.01), ↑ TST Latency Variability in Progressive MS vs. HC (p < 0.01), ↑ TST Latency Variability in Progressive MS vs. RRMS (p < 0.01)	NA	NA
Ho et al. 1999	14	NA	NA	4	M = 48.8, SD = 8.3	M = 5.7, SD = 1.8	Poser (Poser et al. 1983)	NA	NA	8	1	Range = 26.0-51.0	EDSS, FSS, MAS, Grip Strength	NA	4 MS, 4 HC: Bilateral M1 (FDI), 4 MS, 4 HC: Unilateral M1 (FDI)	F8, Diameter = 8 cm	Resting: RMT (%MSO), MEP Area, MEP Latency (ms), SICF (CS/TS), CMCT (ms)	↑ RMT in MS vs. HC (p ≤ 0.03), ↑ CMCT in MS vs. HC (p < 0.001), ↑ CMCT Abnormality in More Impaired vs. Less Impaired Side in MS (p = 0.01)	NA	EDSS:CMCT in MS (p < 0.001)
Hulst et al. 2017	17	13	SPMS: n = 4	10	M = 43.3, SD = 8.3	Median = 3.5, Interquartile Range = 1.5-4.5	2005 Revised McDonald (Polman et al. 2005)	M = 11.9, SD = 6.8	NA	11	6	M = 42.3, SD = 11.1	EDSS	Digit Span, LDST, LLT, LNS, N-Back, VLGT, WLG	L-M1 (FDI)	F8, Diameter = 6.5 cm	Resting: RMT (%MSO)	NS (p > 0.061)	NS (p > 0.05)	NA
Ingram et al. 1988	20	20	0	12	M = 38.2, SD = 9.1	M = 3.4, SD = 1.8	Poser (Poser et al. 1983)	M = 8.2, SD = 5.9	NA	10	NA	M = 37.0, Range = 24.0-53.0	EDSS, T25FW, MRC Scale, Reflexes	NA	Bilateral M1 (BB, APB)	C, Diameter = 10 cm	Active: MEP Amplitude (Absolute), MEP Latency (ms), CMCT (ms)	NS (p > 0.05)	NA	NS (p > 0.05)
Kale et al. 2010	79	60	SPMS: n = 19	51	M = 35.3, SD = 7.6	Range = 0.0-2.0: n = 41, Range = 2.0-4.0: n = 19, Range ≥ 4.0: n = 19	McDonald (McDonald et al. 2001)	Range ≤ 5: n = 32, Range = 5-10: n = 31, Range ≥ 10: n = 16	NA	50	31	M = 34.5, SD = 10.4	EDSS, MRC Scale, Reflexes	NA	Bilateral M1 (APB)	C, Diameter = NA	Resting: MEP Amplitude (Absolute), MEP Latency (ms), CMCT (ms)	↓ MEP Amplitude in MS vs. HC (p < 0.001), ↑ MEP Latency in MS vs. HC (p < 0.001), ↑ CMCT in MS vs. HC (p < 0.001)	NA	EDSS:MEP Amplitude in MS (p < 0.05)
Lenzi et al. 2007	18	18	0	12	M = 36.0, SD = 8.0	Median = 1.5, Range = 0.0-4.5	McDonald (McDonald et al. 2001)	M = 7.0, SD = 5.0	Interferon-β: n = 17	18	Sex-matched to MS	Age-matched to MS	EDSS	NA	Dominant M1 (FDI)	F8, Diameter = NA	Resting: RMT (%MSO), MEP Amplitude (Absolute), MEP Latency (ms), CMCT (ms), Active: iSP Latency (ms), iSP Duration (ms), iSP Conduction Time (ms)	↑ MEP Latency in MS vs. HC (p < 0.0001), ↑ CMCT MS vs. HC (p < 0.0001), ↑ iSP Latency in MS vs. HC (p < 0.0001), ↓ iSP Duration in MS vs. HC, (p < 0.0001), ↑ iSP Conduction Time in MS vs. HC (p < 0.0001)	NA	NS (p > 0.05)
Liepert et al. 2005	16	RRMS Without Fatigue: n = 8, RRMS With Fatigue: n = 8	0	13	RRMS Without Fatigue: M = 40.3, SD = 4.5, RRMS With Fatigue: M = 42.5, SD = 5.0	RRMS Without Fatigue: M = 3.0, SD = 0.9, RRMS With Fatigue: M = 3.2, SD = 0.9	Poser (Poser et al. 1983)	NA	NA	16	6	M = 32.8, SD = 10.3	EDSS, FSS	Grip Strength	L-M1 (FDI)	F8, Diameter = NA	Resting: RMT (%MSO), MEP Amplitude (Absolute), MEP Latency (ms), SICI (%TS), ICF (%TS)	↓ SICI in RRMS With Fatigue vs. HC (p = 0.0004), ↓ SICI in RRMS With Fatigue vs. RRMS Without Fatigue (p = 0.0053)	↑ FSS in RRMS With Fatigue vs. RRMS Without Fatigue (p = 0.012), ↓ Grip Strength in RRMS With Fatigue vs. HC (p = 0.0094)	NA
Llufriu et al. 2012	21	21	0	12	M = 37.2, SD = 6.9	Median = 2.0, Range = 0.0-6.0	2005 Revised McDonald (Polman et al. 2005)	M = 9.5, SD = 5.4	Not Specified: n = 21	13	8	M = 35.2, SD = 7.4	EDSS, MSFC, SRT-LTS, SRT-CLTR, SRT-D, SPART, SPART-D, SDMT, PASAT-3, WLG, BRB	NA	Bilateral M1 (FDI)	F8, Diameter = NA	Resting: RMT (%MSO), Active: AMT (%MSO), CMCT (ms), iSP Duration (ms), iSP Latency (ms)	↑ iSP Latency in MS vs. HC (p = 0.001), ↑ CMCT in MS vs. HC (p = 0.007)	NA	EDSS:iSP Latency in MS (r = 0.66, p = 0.001)
Morgante et al. 2011	33	RRMS Without Fatigue: n = 17, RRMS With Fatigue: n = 16	0	22	RRMS Without Fatigue: M = 38.0, SD = 9.4, RRMS With Fatigue: M = 41.1, SD = 10.9	RRMS Without Fatigue: M = 1.6, SD = 0.6, RRMS With Fatigue: M = 1.8, SD = 0.6	Poser (Poser et al. 1983)	RRMS Without Fatigue: M = 7.9, SD = 3.8, RRMS With Fatigue: M = 8.4, SD = 3.4	Azathioprine, Glatiramer Acetate, or Interferon-β: n = 32 No Treatment: n = 1	12	NA	Age-matched to MS	EDSS, FSS	NA	L-M1 (FDI, APB)	F8, Diameter = 9 cm	Resting: RMT (%MSO), MEP Amplitude (Absolute), SICI (CS/TS), ICF (CS/TS), CMCT (ms), Active: AMT (%MSO)	↓ MEP Amplitude in MS vs. HC (p = 0.03), ↑ CMCT in RRMS With Fatigue vs. HC (p = 0.006), ↑ CMCT in RRMS Without Fatigue vs. HC (p = 0.001)	↑ FSS in RRMS With Fatigue vs. RRMS Without Fatigue (p < 0.001)	NA
Nantes et al. 2016a	36	22	PPMS: n = 6, SPMS: n = 8	25	RRMS: M = 44.0, SD = 12.0, Progressive MS: M = 60.0, SD = 13.0	RRMS: M = 2.1, SEM = 0.3, Progressive MS: M = 4.2, SEM = 0.4	NA	RRMS: M = 10.0, SD = 7.0, Progressive MS: M = 17.0, SD = 16.0	Not Specified: n = 15	18	13	M = 45.0, SD = 14.0	EDSS	MSFC, 9HPT	Dominant M1 (FDI)	F8, Diameter = 9.5 cm	Resting: RMT (%MSO), MEP Amplitude (Absolute), MEP Latency (ms), SICI (%TS), LICI (%TS), ICF (%TS), Active: MEP Amplitude (Absolute), MEP Latency (ms), CSP Duration (ms)	↓ MEP Amplitude (Active) in SPMS vs. HC (p < 0.05), ↓ MEP Amplitude (Active) in SPMS vs. RRMS (p < 0.05), ↑ MEP Latency (Active) in Progressive MS vs. HC (p < 0.05), ↑ MEP Latency (Active) in Progressive MS vs. RRMS (p < 0.05), ↓ SICI in SPMS vs. HC (p < 0.01), ↓ SICI in SPMS vs. RRMS (p < 0.01), ↓ SICI in SPMS vs. PPMS (p < 0.05)	↑ EDSS in Progressive MS vs. RRMS (p < 0.01), ↓ MSFC in Progressive MS vs. HC (p < 0.001), ↓ MSFC in Progressive MS vs. RRMS (p < 0.001), ↓ 9HPT performance in Progressive MS vs. HC (p < 0.001), ↓ 9HPT performance in Progressive MS vs. RRMS (p < 0.001)	NS (p > 0.05)
Nantes et al. 2016b	43	RRMS With Preserved Function: n = 30, RRMS With Impaired Function: n = 13	0	28	RRMS With Preserved Function: M = 42.9, SD = 11.0, RRMS With Impaired Function: M = 48.6, SD = 12.6	RRMS With Preserved Function: Median = 1.8, Quartile 1-Quartile 3 = 1.0, 2.4, RRMS With Impaired Function: Median = 3.0, Quartile 1-Quartile 3 = 2.0-3.5	NA	RRMS With Preserved Function: Median = 8.9, Quartile 1-Quartile 3 = 3.2- 12.4, RRMS With Impaired Function: Median = 8.3, Quartile 1-Quartile 3 = 5.7-11.6	Not Specified: n = 27	29	21	M = 45.0, SD = 13.0	EDSS	MSFC, 9HPT, PASAT-3, T25FW, Pinch Strength	Dominant M1 (FDI)	F8, Diameter = 9.5 cm	Resting: RMT (%MSO), MEP Amplitude (Absolute), MEP Latency (ms), SICI (%TS), Active: MEP Amplitude (Absolute), MEP Latency (ms), CSP Duration (ms)	↓ MEP Amplitude (Resting) in RRMS With Impaired Function vs. HC (p = 0.003), ↓ MEP Amplitude (Resting) in RRMS With Impaired Function vs. RRMS With Preserved Function (p = 0.003), ↑ MEP Latency (Resting) in RRMS With Impaired Function vs. HC (p < 0.001), ↑ MEP Latency (Resting) in RRMS With Impaired Function vs. RRMS With Preserved Function (p < 0.001), ↑ MEP Latency (Active) in RRMS With Impaire…	↑ EDSS in RRMS With Impaired Function vs. RRMS With Preserved Function (p = 0.04), ↓ 9HPT performance in RRMS With Impaired Function vs. HC (p < 0.001), ↓ 9HPT performance in RRMS With Impaired Function vs. RRMS With Preserved Function (p < 0.01), ↓ T25FW in MS vs. HC (p < 0.05), ↓ PASAT-3 in RRMS With Impaired Function vs. HC (p < 0.01), ↓ PASAT-3 in RRMS With Impaired Function vs. RRMS With Pre…	EDSS:CSP Duration in RRMS (r = 0.36, p = 0.02), 9HPT Dominant Limb:CSP Duration in RRMS (r = 0.37, p = 0.01), 9HPT:MEP Latency (Active) in RRMS (r > 0.32, p < 0.05), MSFC:MEP Latency (Active) in RRMS (r > 0.32, p < 0.05)
Neva et al. 2016	26	26	0	21	M = 41.4, Range = 28.0-55.0	Median = 2.0, Range = 0.0-6.0	McDonald (McDonald et al. 2001)	M = 7.6, Range = 0.5-28.0	Glatiramer Acetate: n = 26	11	8	M = 45.6, Range = 32.0-58.0	EDSS	NA	Bilateral M1 (ECR)	F8, Diameter = 7.0 cm	Resting: RMT (%MSO), SICI (CS/TS), ICF (CS/TS), Active: AMT (%MSO), MEP Latency (ms), MEP Duration (ms), MEP Recruitment Curve Slope, iSP Latency (ms), iSP Duration (ms), iSP Amplitude (%Pre-stim), CSP Latency (ms), CSP Duration (ms)	↑ RMT in MS vs. HC (p = 0.022), ↑ AMT in MS vs. HC (p = 0.012), ↑ MEP Latency in MS vs. HC (p < 0.05), ↑ MEP Duration in MS vs. HC (p < 0.05), ↓ MEP Recruitment Curve Slope in MS vs. HC (p < 0.001), ↑ CSP Latency in MS vs. HC (p = 0.011), ↑ MEP Latency in MS Left vs. Right Hemisphere (p = 0.015)	NA	EDSS:RMT in MS (r = 0.41, p = 0.048), EDSS:MEP Recruitment Curve Slope in MS (r = -0.56, p = 0.003)
Perretti et al. 2004	41	RRMS Without Fatigue: n = 9 RRMS With Fatigue: n = 32	0	21	RRMS Without Fatigue: M = 28.7, SD = 7.1, RRMS With Fatigue: M = 37.7, SD = 10.0	RRMS Without Fatigue: M = 2.3, SD = 0.5, RRMS With Fatigue: M = 3.4, SD = 1.0	Poser (Poser et al. 1983)	NA	Interferon-β: n = 41	13	8	M = 30.7, SD = 8.8	EDSS	FSS, MVC	L-M1 (APB)	F8, Diameter = 9.5 cm	Resting: RMT (%MSO), MEP Amplitude (Absolute), MEP Latency (ms), MEP Duration (ms), MEP Area, MEP Number of Turns	↑ RMT in MS vs. HC (p = 0.0014), ↓ MEP Amplitude in MS vs. HC (p = 0.0005), ↑ MEP Latency in MS vs. HC (p = 0.0048), ↑ MEP Duration in MS vs. HC (p = 0.0220), ↑ MEP Number of Turns in MS. Vs. HC (p = 0.0113)	↑ FSS in MS vs. HC (p < 0.05), ↑ FSS in RRMS With Fatigue vs. RRMS Without Fatigue (p < 0.05), ↑ EDSS in RRMS With Fatigue vs. RRMS Without Fatigue (p < 0.05)	NS (r≤ 0.18, p > 0.05)
Sandroni et al. 1992	10	NA	NA	8	M = 39.2, SD = 4.4	M = 5.1, SD = 1.2	"Certain" diagnosis of MS based on the criteria of two separate clinical episodes with neurological signs and multiple periventricular lesions on magnetic resonance imaging.	M = 11.5, SD = 6.5	Azathioprine: n = 6, Amitryptaline: n = 2, Amantadine: n = 1, Prednisone: n = 6, Baclofen: n = 1, Alprazolam: n = 1, Fluoxetine: n = 1, Trazodone: n = 1, Triazolam: n = 1, No Treatment: n = 2	10	NA	M = 29.0, Range = 18.0-45.0	EDSS, FSS, MMSE	NA	Unilateral M1 (OP)	NA, Diameter = 9.5 cm	Resting: CMCT (ms), Active: CMCT (ms)	NS (p > 0.05)	NA	NS (p > 0.05)
Santarnecchi et al. 2015	10	8	SPMS: n = 2	10	M = 35.9, SD = 12.3	M = 2.1, SD = 1.4	2005 Revised McDonald (Polman et al. 2005)	M = 12.0, SD = 7.6	Interferon-β: n = 5, No Treatment: n = 5	10	7	M = 32.4, SD = 6.7	EDSS, FSS, FIS	NA	L-M1 (FDI, ADM)	F8, Diameter = 9 cm	Active: CSP Duration (ms)	↓ FDI CSP Duration in MS vs. HC, (p = 0.033)	NA	NA
Scheidegger et al. 2012	23	NA	NA	4	M = 39.7, SD = 11.4	M = 3.2, SD = 1.6	2010 Revised McDonald (Polman et al. 2011)	NA	Interferon-β: n = 12, Mitoxantrone: n = 2, No Treatment: n = 9	13	3	M = 28.0, Range = 23.0-54.0	EDSS, FSS	NA	L-M1 (ADM)	C, Diameter = 9 cm	Resting: TST Amplitude Ratio	NS (p > 0.05)	NA	NS (p > 0.05)
Schmierer et al. 2002	118	96	PPMS: n = 19, SPMS: n = 3	76	M = 37.0, Range = 16.0-65.0	M = 2.9, Range = 0.0-6.5	Poser (Poser et al. 1983)	M = 4.9, Range = 0.5-21.0	NA	35	18	M = 36.0, Range = 20.0-62.0	EDSS	NA	Bilateral M1 (FDI)	F8, Diameter = 8.5 cm	Resting: RMT (%MSO), Active: CMCT (ms), iSP Latency (ms), iSP Duration (ms), iSP Conduction Time (ms)	↑ CMCT in MS vs. HC (p < 0.05), ↑ iSP Latency in MS vs. HC (p < 0.05), ↑ iSP Duration in MS vs. HC (p < 0.05), ↑ iSP Conduction Time in MS vs. HC (p < 0.05)	NS (p > 0.05)	EDSS:CMCT in MS (r = 0.36, p < 0.01), EDSS:iSP Latency in MS (r = 0.36, p < 0.01), EDSS:iSP Duration in MS (r = 0.31, p < 0.01) EDSS:iSP Latency in PPMS (r = 0.40, p = 0.01)
Tataroglu et al. 2003	58	37	Not Specified: n = 21	38	M = 35.4, SD = 11.1	RRMS: M = 1.7, SD = 1.2, Progressive MS: M = 4.5, SD = 1.9	McDonald (McDonald et al. 2001)	M = 6.7, Range = 1.0-22.0	NA	31	18	M = 33.4, SD = 9.6	EDSS, Kurtzke FSS	NA	Bilateral M1 (FDI)	NA, Diameter = 9 cm	Resting: MEP Amplitude (Absolute), MEP Latency (ms), Active: CSP Latency (ms), CSP Duration (ms)	↓ MEP Amplitude in MS vs. HC (p < 0.001), ↑ CMCT in RRMS vs. HC (p = 0.001), ↑ CMCT in Progressive MS vs. HC (p = 0.0001), ↑ CSP Duration in RRMS vs. HC (p = 0.002), ↑ CSP Duration in Progressive MS vs. HC (p = 0.014)	↑ EDSS in Progressive MS vs. RRMS (p < 0.001), ↑ Kurtzke FSS Pyramidal Domain in Progressive MS vs. RRMS (p < 0.001), ↑ Kurtzke FSS Cerebellar Domain in Progressive MS vs. RRMS (p < 0.001), ↑ Kurtzke FSS Sensory Domain in Progressive MS vs. RRMS (p < 0.001), ↑ Kurtzke FSS in Progressive MS vs. RRMS (p < 0.001)	EDSS:MEP Amplitude in MS (r = 0.52, p < 0.01), EDSS:MEP Latency in MS (r = 0.64, p < 0.01), EDSS: CMCT in MS (r = 0.61, p < 0.01), Kurtzke FSS Pyramidal Domain:MEP Amplitude in MS (r = 0.60, p < 0.01), Kurtzke FSS Pyramidal Domain:CMCT in MS in MS (r = 0.64, p < 0.01), Kurtzke FSS Cerebellar Domain:MEP Amplitude in MS (r = 0.35, p < 0.05), Kurtzke FSS Cerebellar Domain:CSP Duration in MS (r = 0.3…
Tataroglu et al. 2004	28	18	Not Specified: n = 10	18	M = 33.5, SD = 8.3	M = 2.8, SD = 2.0	McDonald (McDonald et al. 2001)	M = 6.4, SD = 4.3	NA	22	14	M = 32.8, SD = 5.2	EDSS, FSS, Kurtzke FSS	NA	Bilateral M1 (APB)	C, Diameter = 9 cm	Active: MEP Latency (ms), CMCT (ms)	↑ MEP Latency in Progressive MS vs. HC (p < 0.05), ↑ CMCT in MS vs. HC (p < 0.0001), ↑ MEP Latency in Progressive MS vs. RRMS (p < 0.0001), ↑ CMCT in Progressive MS vs. RRMS (p < 0.0001)	↑ EDSS in Progressive MS vs. RRMS (p < 0.0001)	EDSS:MEP Latency in MS (r = 0.79, p < 0.01), FSS:MEP Latency in MS (r = 0.48, p < 0.01), Kurtzke FSS Pyramidal Domain:MEP Latency in MS (r = 0.62, p < 0.01), Kurtzke FSS Cerebellar Domain:MEP Latency in MS (r = 0.53, p < 0.01)
Vucic et al. 2012	40	25	SPMS: n = 15	28	RRMS: M = 39.4, Range = 27.0-56.0, SPMS: M = 48.6, Range = 31.0-68.0	RRMS: M = 1.6, SEM = 0.2, SPMS: M = 5.9, SEM = 0.3	2005 Revised McDonald (Polman et al. 2005)	RRMS: M = 5.8, SEM = 1.6, SPMS: M = 9.9, SEM = 1.9	Alemtuzumab: n = 7, Glatiramer Acetate: n = 6, Interferon-β: n = 21, No Treatment: n = 13	66	34	M = 44.0, Range = 23.0-73.0	EDSS, MFIS	NA	Unilateral M1 (APB)	C, Diameter = 9 cm	Resting: RMT (%MSO), MEP Amplitude (%Mmax), MEP Latency (ms), SICI (%TS), ICF (%TS), CMCT (ms), Active: CSP Duration (ms)	↑ RMT in SPMS vs. HC (p < 0.001), ↑ RMT in SPMS vs. RRMS (p < 0.01), ↓ MEP Amplitude in SPMS vs. HC (p < 0.01), ↓ MEP Amplitude in SPMS vs. RRMS (p < 0.05), ↓ SICI in SPMS vs. HC (p < 0.01), ↓ SICI in SPMS vs. RRMS (p < 0.01), ↑ ICF in SPMS vs. HC (p < 0.01), ↑ ICF in SPMS vs. RRMS (p < 0.05), ↑ CMCT in RRMS vs. HC (p < 0.05), ↑ CMCT in SPMS vs. HC (p < 0.001), ↑ CMCT in SPMS vs. RRMS (p = 0.05)	NA	EDSS:RMT in MS (ρ = 0.50, p < 0.01), EDSS:MEP Amplitude in MS (ρ = -0.42, p < 0.05), EDSS:SICI in MS (ρ = -0.72, p < 0.001), EDSS:CMCT in MS (ρ = 0.6, p < 0.001)
Wahl et al. 2011	16	16	0	12	M = 32.9, SD = 6.8	M = 1.5, SD = 0.5	2005 Revised McDonald (Polman et al. 2005)	M = 1.6, SD = 1.2	Glatiramer Acetate: n = 4, Interferon-β: n = 7, Natalizumab: n = 1, No Treatment: n = 4	12	5	M = 32.6, SD = 9.0	EDSS	9HPT	Bilateral M1 (FDI)	F8, Diameter = 7 cm	Resting: CMCT (ms), SIHI (%TS), LIHI (%TS)	↓ SIHI in MS vs. HC (p ≤ 0.037)	NS (p ≥ 0.10)	NA
White et al. 2013	11	11	0	7	M = 38.9, SD = 6.9	M = 1.9, Range = 1.0-3.0	McDonald (McDonald et al. 2001)	M = 5.6, SD = 2.0	NA	11	7	M = 37.4, SD = 9.6	EDSS	FIS	R-M1 (APB)	DC, Diameter = 7 cm	Resting: MEP Amplitude (%Mmax), MEP Latency (ms), MEP Recruitment Curve Slope, CMCT (ms), Active: CSP Duration (ms)	NS (p > 0.05)	↑ FIS in MS vs. HC (p < 0.05), ↑ FIS Physical Domain in MS vs. HC (p < 0.05), ↑ FIS Cognitive Domain in MS vs. HC (p < 0.05), ↑ FIS Social Domain in MS vs. HC (p < 0.05)	NA
Zeller et al. 2010	22	19	SPMS: n = 3	16	M = 36.6, SD = 10.7	M = 2.5, Range = 0.0-6.0	McDonald (McDonald et al. 2001)	M = 8.9, SD = 5.9	Azathioprine: n = 2, Glatiramer Acetate: n = 5, Interferon-β: n = 10, Mitoxanthrone: n = 3, No Treatment: n = 2	22	16	M = 34.8, SD = 11.4	EDSS	9HPT	Dominant M1 (APB)	F8, Diameter = NA	Resting: MEP Amplitude (Absolute), MEP Latency (ms)	↑ MEP Latency in MS vs. HC (p = 0.002)	↓ 9HPT performance in MS vs. HC (p < 0.001)	EDSS:MEP Latency in MS (r = 0.55, p = 0.009)
Zeller et al. 2012	14	14	0	8	M = 30.1, SD = 6.8	Median = 1.5, Range = 0.0-3.5	2005 Revised McDonald (Polman et al. 2005)	M = 5.9, SD = 2.5	Fingolimod: n = 2, Glatiramer Acetate: n = 1, Interferon-β: n = 9, Natalizumab: n = 2	14	8	M = 30.5, SD = 6.9	EDSS	NA	Dominant M1 (APB)	F8, Diameter = NA	Resting: RMT (%MSO), MEP Amplitude (Absolute), MEP Latency (ms)	↑ MEP Latency in MS vs. HC (p = 0.05)	NA	NA
Zipser et al. 2018	13	13	0	9	M = 37.0, SD = 8.0	Median = 1.0, Range = 0.0-2.5	2010 Revised McDonald (Polman et al. 2011)	Median = 1.0, Range = 0.25-12.0	Glatiramer Acetate: n = 5, Interferon-β: n = 5, No Treatment: n = 3	16	8	M = 30.0, SD = 8.0	EDSS	NA	Bilateral M1 (APB)	F8, Diameter = 9.0 cm	Resting: RMT (%MSO)	↑ RMT in MS vs. HC (p < 0.05)	NA	NA
